# Supplementary material for: NHC catalysed direct addition of HMF to diazo compounds: synthesis of acyl hydrazones with antitumor activity
Source: Royal Society of Chemistry journal article supplement (doi:10.1039/c4ra03710c), 2014-01-01
Supplement: c4ra03710c1.pdf [file c4ra03710c1.pdf]

*Supplementary information for*

**NHC Catalysed direct addition of HMF to diazo compounds: Synthesis of Acyl Hydrazones with antitumor activity**

João P.M. António,<sup>[a]</sup> Raquel F.M. Frade,<sup>a</sup> Fábio M. F. Santos,<sup>[a]</sup> Jaime A. S. Coelho,<sup>[a]</sup> Carlos A. M. Afonso,<sup>[a]</sup> Pedro M. P. Gois,<sup>\*,[a]</sup> and Alexandre F. Trindade<sup>\*,[a,b]</sup>

<sup>a</sup>Instituto de Investigação do Medicamento (iMed.U LISBOA), Faculdade de Farmácia, Universidade de Lisboa, Av. Prof. Gama Pinto, 1649-003 Lisboa, Portugal, Fax: (+351) 217 946 470

<sup>b</sup>CQFM, Centro de Química-Física Molecular and IN - Institute of Nanosciences and Nanotechnology, Instituto Superior Técnico, 1049-001 Lisboa, Portugal. Fax: + 351 21 846 4455/7;

|                                            |    |
|--------------------------------------------|----|
| General Remarks                            | 1  |
| Synthesis of HMF protected derivatives     | 2  |
| Synthetic procedures                       | 3  |
| N-acyl hydrazones characterization         | 4  |
| Selectivity studies of reaction 1 table 2. | 39 |
| Biological Evaluation                      | 48 |
| Toxicity assay with CaCo-2 monolayer       | 48 |
| References                                 | 48 |

**General Remarks**

**Synthesis**

Dichloromethane (DCM), toluene, methanol and acetonitrile were freshly dried and distilled over calcium hydride, while THF was dried from sodium/benzophenone. All reactions were performed in oven-dried glassware under argon atmosphere. N-heterocyclic carbenes (NHCs) were prepared following reported procedures<sup>1-3</sup>, with exception of 1-Mesityl-3,4-dimethyl-4H-1,2,4-triazolium tetrafluoroborate and (5*R*,6*S*)-2-Mesityl-5,6-diphenyl-6,8-dihydro-5H-[1,2,4]triazolo[3,4-*c*][1,4]oxazin-2-ium tetrafluoroborate which were purchased from Aldrich. All bases were acquired from Sigma-Aldrich and used without any previous purification with exception of potassium *t*-butoxide which was freshly sublimed before use. Diazo compounds were prepared according to procedures described in the literature<sup>4-9</sup>. HMF<sup>10</sup> and 2,5-furan dicarbaldehyde<sup>11</sup> were prepared according to the literature procedures. Preparative thin layer chromatography (TLC) plates were prepared with silica gel 60 GF254 Merck (Ref.1.07730.1000). Reaction mixtures were analysed by TLC using ALUGRAM® SIL G/UV254 from MN (Ref. 818133, silica gel 60), and visualisation of TLC spots was effected using ultraviolet (UV) and phosphomolybdic acid solution. Nuclear magnetic resonance (NMR) spectra were recorded in a Bruker AMX 400 and in a Bruker Avance II 300 using CDCl<sub>3</sub> and (CD<sub>3</sub>)<sub>2</sub>SO as solvents and (CH<sub>3</sub>)<sub>4</sub>Si (<sup>1</sup>H) as internal standard. All coupling constants are expressed in Hz. Electrospray ionization (ESI) mass spectra were recorded in a mass spectrometer (Micromass Quattro Micro API, Waters, Ireland) with a Triple Quadrupole (TQ) and with an electrospray ion source operating in positive mode. Elemental analysis was S2 performed in a Flash 2000 CHNS-O analyzer (ThermoScientific, UK).

## Synthesis of HMF protected derivatives

### 5-(Benzyloxy)methylfuran-2-carbaldehyde

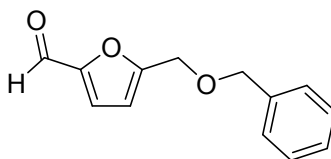

Benzyl bromide (3.8 g, 22.2 mmol) and silver oxide (2.6 g, 11.1 mmol) were successively added to a stirred solution of HMF (1.4 g, 11.1 mmol) dissolved in DMF (15 mL). The mixture was stirred for 50 h at RT. The solution was evaporated under reduced pressure and the residue was chromatographed (silica; hexane-EtOAc, 1:1) to give the desired product (1.2 g, 50 % yield).

$^1\text{H}$  NMR (300 MHz,  $\text{CDCl}_3$ )  $\delta$  0.87 (t,  $J = 6.9$  Hz, 3H), 1.27-1.31 (m, 4H), 1.63 (quint,  $J = 7.4$  Hz, 2H), 2.35 (t,  $J = 7.6$ , 2H), 5.12 (s, 2H), 6.58 (d,  $J = 3.55$  Hz, 1H), 7.21 (d,  $J = 3.55$  Hz, 1H), 9.63 (s, 1H);  $^{13}\text{C}$  NMR (300 MHz,  $\text{CDCl}_3$ )  $\delta$  64.2, 73.0, 111.4, 122.0, 128.0, 128.1, 128.6, 137.3, 152.7, 158.5, 177.8. The NMR spectra are in good accordance with the literature.<sup>12</sup>

### 5-(tert-Butyldimethylsilyloxy)methylfuran-2-carbaldehyde

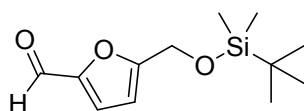

To a solution of HMF (1.6 g, 12.7 mmol) in DMF (3.2 mL) were added imidazole (2.2 g, 31.7 mmol, 2.5 equiv.) and *tert*-butyldimethylsilyl chloride (2.3 g, 15.2 mmol, 1.2 equiv.). The solution was stirred for 22 h. The silylated compound was extracted with hexane (5 x 20 mL). The collected organic layers were washed with brine, dried over  $\text{Na}_2\text{SO}_4$ , and the solvent removed to give the crude product that was distilled (100°C/0.8 mbar) giving the product (1.9 g, 63 % yield) as a light yellow liquid that solidifies in the freezer (0°C).

$^1\text{H}$  NMR (300 MHz,  $\text{CDCl}_3$ )  $\delta$  0.08 (s, 6H), 0.89 (s, 9H), 4.71 (s, 2H), 6.45 (d,  $J = 3.53$  Hz, 1H), 7.19 (d,  $J = 3.53$  Hz, 1H), 9.56 (s, 1H);  $^{13}\text{C}$  NMR (300 MHz,  $\text{CDCl}_3$ )  $\delta$  -5.3, 18.4, 25.8, 57.9, 58.7, 109.5, 122.6, 152.3, 161.5, 175.6. The NMR spectra are in good accordance with the literature.<sup>13</sup>

### (5-Formylfuran-2-yl)methyl acetate

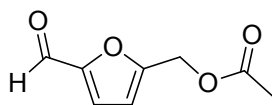

To a flame dried round-bottom flask, HMF (3.5 g, 27.8 mmol), MeCN (50 mL) and acetic anhydride (4.3 mL, 45.6 mmol) were added followed by catalytic amount of pyridine (0.5 mL, 6.2 mmol). The reaction mixture was allowed to stir at room temperature for 22h under argon atmosphere. The solvent was removed and the product purified by column chromatography with silica gel (hexane/ethyl acetate 8:2) to give the product (4.3 g, 93% yield) as a pale yellow oil that crystallized in the freezer (0°C).

$^1\text{H}$  NMR (300 MHz,  $\text{CDCl}_3$ )  $\delta$  2.11 (s, 3H), 5.12 (s, 2H), 6.58 (d,  $J = 3.55$  Hz, 1H), 7.21 (d,  $J = 3.55$  Hz, 1H), 9.64 (s, 1H);  $^{13}\text{C}$  NMR (300 MHz,  $\text{CDCl}_3$ )  $\delta$  20.8, 57.9, 112.7, 121.8, 153.0, 160.8, 155.6, 170.5, 178.0. The NMR spectra are in good accordance with the literature.<sup>12</sup>

### (5-Formylfuran-2-yl)methyl hexanoate

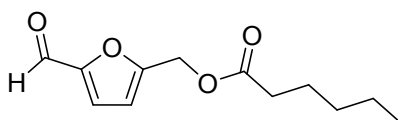

To a flame dried round-bottom flask, HMF (0.250 g, 1.98 mmol), MeCN (10 mL) and hexanoic anhydride (0.51 mL, 2.2 mmol, 1.1 equiv.) were added followed by catalytic amount of pyridine (32  $\mu$ L, 0.4 mmol, 0.2 equiv.). The reaction mixture was allowed to stir at room temperature for 66 h under argon atmosphere. The mixture was quenched with cold water, acidified with HCl 1M and extracted with Et<sub>2</sub>O. The combined organic layers were dried over MgSO<sub>4</sub>, filtered and the solvent removed to give the crude product that was purified by column chromatography with silica gel (hexane/ethyl acetate 8:2) to give the product (0.315 g, 71% yield) as a pale yellow oil.

<sup>1</sup>H NMR (300 MHz, CDCl<sub>3</sub>)  $\delta$  0.87 (t, J = 6.9 Hz, 3H), 1.27-1.31 (m, 4H), 1.63 (quint, J = 7.4 Hz, 2H), 2.35 (t, J = 7.6, 2H), 5.12 (s, 2H), 6.58 (d, J = 3.55 Hz, 1H), 7.21 (d, J = 3.55 Hz, 1H), 9.63 (s, 1H); <sup>13</sup>C NMR (300 MHz, CDCl<sub>3</sub>)  $\delta$  14.0, 22.4, 24.6, 31.3, 34.06, 57.8, 112.6, 121.9, 152.9, 155.8, 173.3, 178.0. The NMR spectra are in good accordance with the literature.<sup>14</sup>

### (5-Formylfuran-2-yl)methyl benzoate

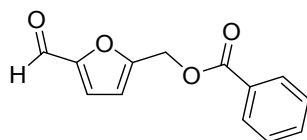

To a flame dried round-bottom flask, HMF (1.0 g, 7.9 mmol) and pyridine (4 mL) were added followed by benzoyl chloride (1 mL, 8.7 mmol, 1.1 equiv.). The reaction mixture was allowed to stir at reflux for 1.5 h under argon atmosphere. The mixture was quenched with cold water (50 mL), acidified with HCl 1M and extracted with Et<sub>2</sub>O. The combined organic layers were dried over MgSO<sub>4</sub>, filtered and the solvent removed to give the crude product that was recrystallized from Et<sub>2</sub>O/hexane as a pale orange solid (0.86 g, 47% yield).

<sup>1</sup>H NMR (300 MHz, CDCl<sub>3</sub>)  $\delta$  5.38 (s, 2H), 6.68 (d, J = 3.55 Hz, 1H), 7.24 (d, J = 3.55 Hz, 1H), 7.46 (t, J = 7.7 Hz, 2H), 7.58 (tt, J = 7.45, 1.30 Hz, 1H), 8.06 (m, 2H), 9.65 (s, 1H). The NMR spectra are in good accordance with the literature.<sup>15</sup>

## Synthetic procedures

### Optimization of the reaction conditions Table 1

NHC precursor (x mol %) and base (x mol %) were dissolved in freshly dry solvent (0.5 mL) inside a round bottom flask under argon. The mixture was stirred for 10 minutes at room temperature. Then a solution of diazo compound (0.24 mmol in 0.5 mL of solvent) was added. Immediately after, HMF (x eq. in 0.5 mL of solvent) was slowly added over the specified amount of time. The mixture was left reacting until most of diazo compound was consumed, usually 16 hours. The final product, N-Acylhydrazone, was isolated by preparative thin layer chromatography (eluent: Hexane/Ethyl acetate).

### Substrate scope Table 2 and scheme 2

NHC precursor **4** (20 mol %) and DBU (40 mol %) were dissolved in freshly dry DCM (0.5 mL) inside a round bottom flask under argon. The mixture was stirred for 10 minutes at room temperature. Then a solution of diazo compound (0.24 mmol in 0.5 mL of DCM) was added. Immediately after, HMF (1.2 eq., 40 mg in 0.5 mL of DCM) (or protected HMF) was slowly added over two hours. The mixture was left reacting until most of diazo

compound was consumed, usually 16 hours. The final product, N-Acylhydrazone, was isolated by flash chromatography (eluent: Hexane/Ethyl acetate).

## N-acyl hydrazones characterization

### Methyl 2-(2-(5-(hydroxymethyl)furan-2-carbonyl)hydrazono)-2-phenylacetate<sup>3</sup>

Isolated as a slightly yellow powder (60 mg, 80 % yield), an inseparable mixture of geometric isomers isomer ratio 1/9. The broadening of N-H does not allow the determination which isomer is the major.

<sup>1</sup>H NMR (400 MHz, CDCl<sub>3</sub>) δ 10.0-8.5 (broad signal, N-H), 7.56-7.34 (6H, m, protons 6-10 and 18), 6.45 (1H, m, proton 17), 4.65-4.59 (2H, m, protons 20), 3.90 (3H, s, protons 22). <sup>13</sup>C NMR (101 MHz, CDCl<sub>3</sub>) δ 164.03 (C1), 158.59 (C19), 144.39 (C16), 130.71 (C8), 129.63 (C6 and C10), 128.29 (C7 and C9), 119.82 (C17), 109.93 (C18), 57.38 (C21), 53.04 (C22).

Elementar analysis for (C<sub>15</sub>H<sub>14</sub>N<sub>2</sub>O<sub>5</sub>)<sub>3</sub>H<sub>2</sub>O calc. %C 58,44; %H 4,79; %N 9,09 found %C 58,41; %H 4,45; %N 8,84.

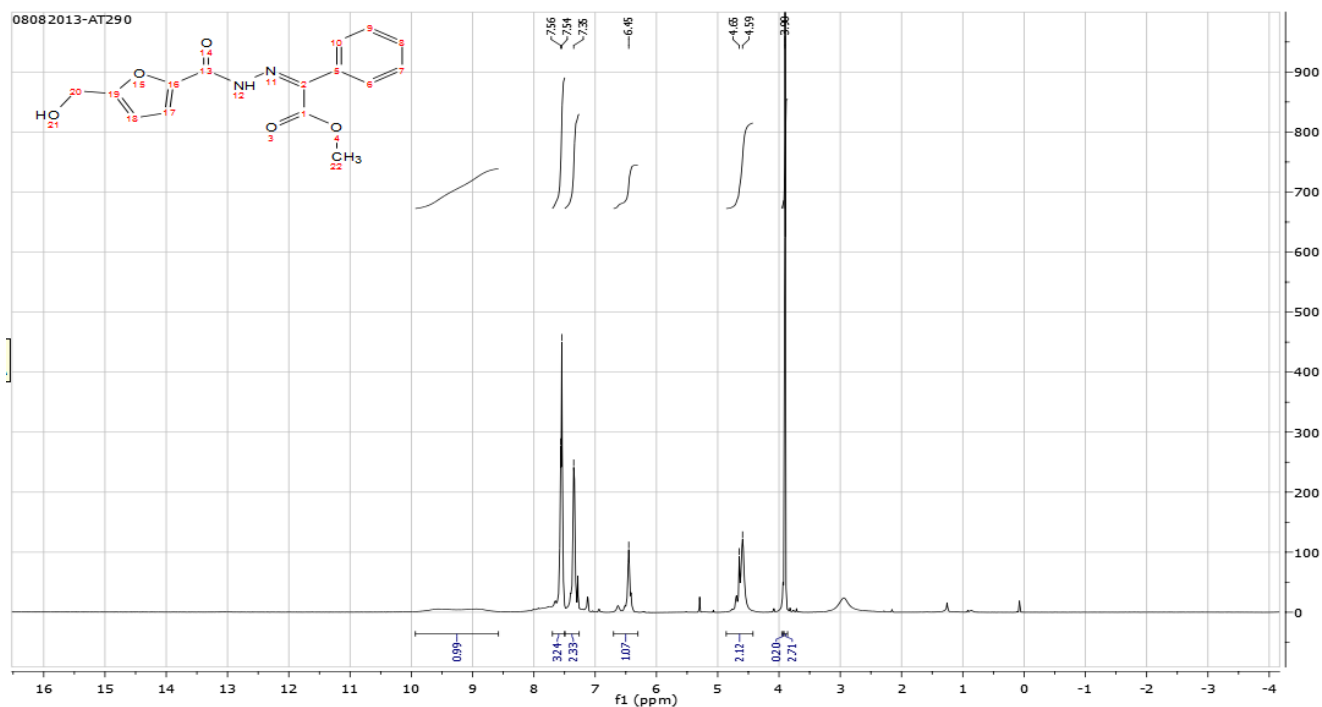

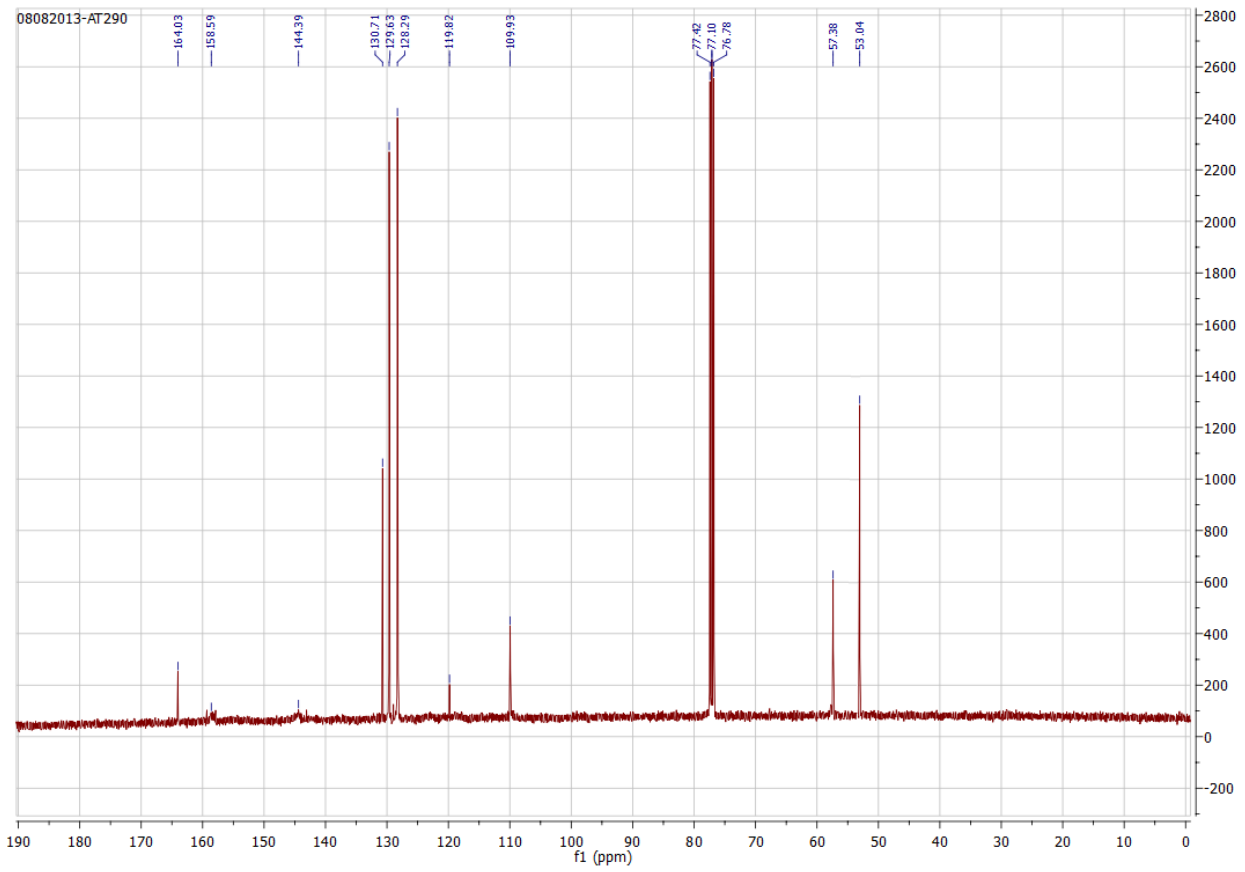

### (E)-Isopropyl 2-(2-(5-(hydroxymethyl)furan-2-carbonyl)hydrazono)-2-phenylacetate12

Isolated as a slightly yellow oil (53 mg, 68 % yield), isolated as a single geometric isomer in DMSO with the structure depicted in <sup>13</sup>C spectra, indicating that isomerization occurs in deuterated chloroform.

<sup>1</sup>H NMR (400 MHz, DMSO) δ 10.31 (1H, bs, N-H), 7.57-7.41 (6H, m, phenyl aromatics + H ortho to carbonyl in furan), 6.54-6.53 (1H, d, H meta to carbonyl in furan), 5.09-5.06 (1H, COOCH(CH<sub>3</sub>)<sub>2</sub>), 4.45-4.43 (2H, d, HOCH<sub>2</sub>), 1.30-1.28 (6H, d, COOCH(CH<sub>3</sub>)<sub>2</sub>). <sup>13</sup>C NMR (101 MHz, DMSO) δ 163.50 (COOCH(CH<sub>3</sub>)<sub>2</sub>), 160.04 (furan quaternary linked to HOCH<sub>2</sub>), 144.69 (Ph quaternary), 130.43 (Ph), 129.70 (Ph), 129.39 (Ph), 129.14 (Ph), 120.58 (furan C ortho to carbonyl), 109.61 (furan C meta to carbonyl), 69.64 (HOCH<sub>2</sub>), 56.27 (COOCH(CH<sub>3</sub>)<sub>2</sub>), 22.02 (COOCH(CH<sub>3</sub>)<sub>2</sub>).

MS (ESI+, M+Na)=353.1; MS (ESI+, 353.1)=311.0 (loss of propylene); MS (ESI+, 311.0)=267.1 (loss of CO<sub>2</sub>). HRMS (EI, M+) calc. 331.1294 found 331.1296.

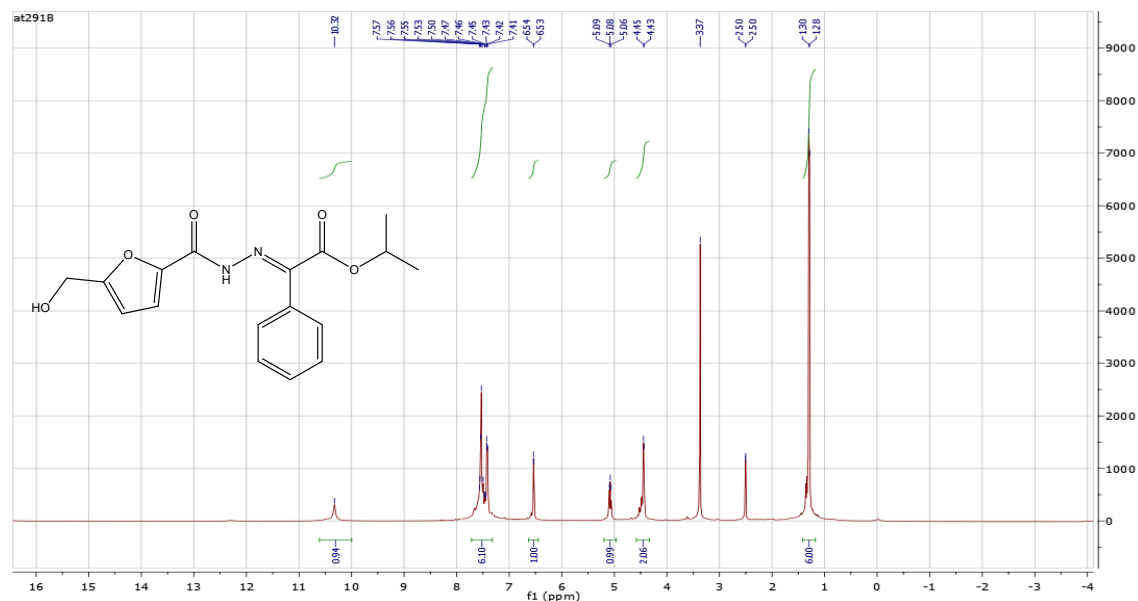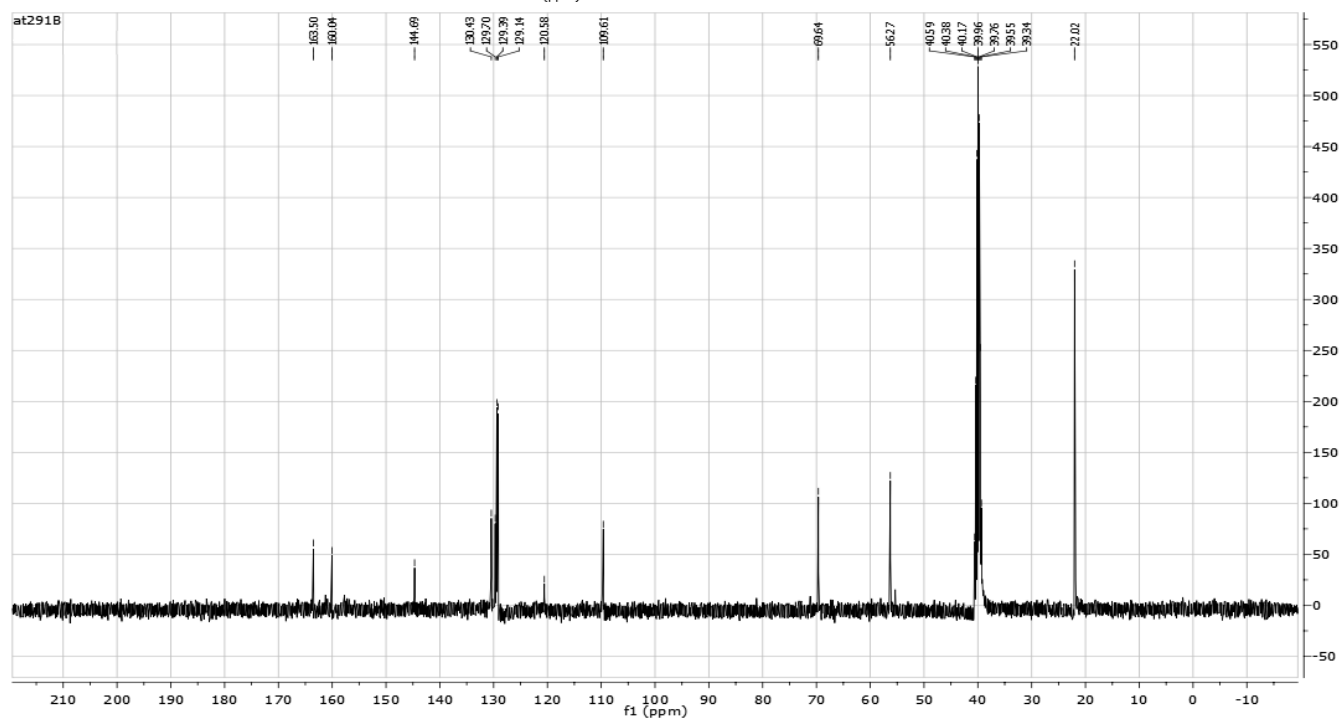

1295 Na MS #1 RT: 0.00 AV: 1 NL: 1.29E5  
ITMS + c ESI Full ms2.353.00@cid26.00 [95.00-1000.00]

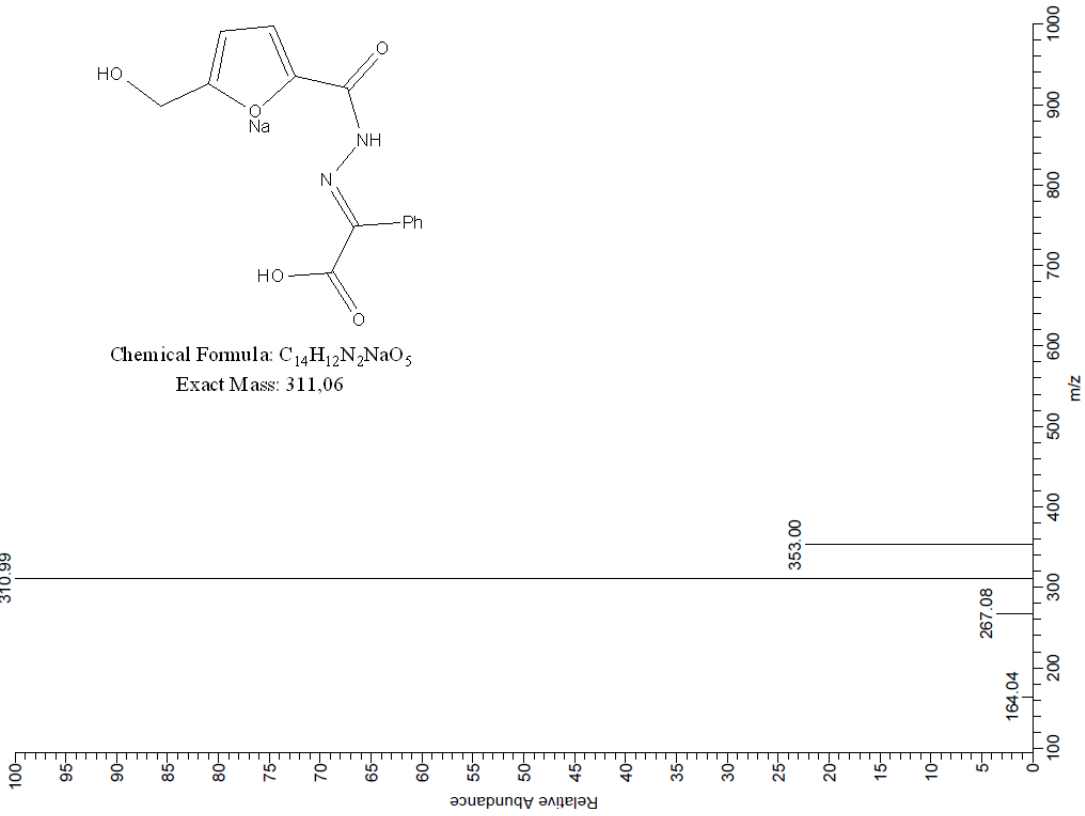

1295 Na #1 RT: 0.00 AV: 1 NL: 1.69E6  
ITMS + c ESI Full ms [150.00-1000.00]

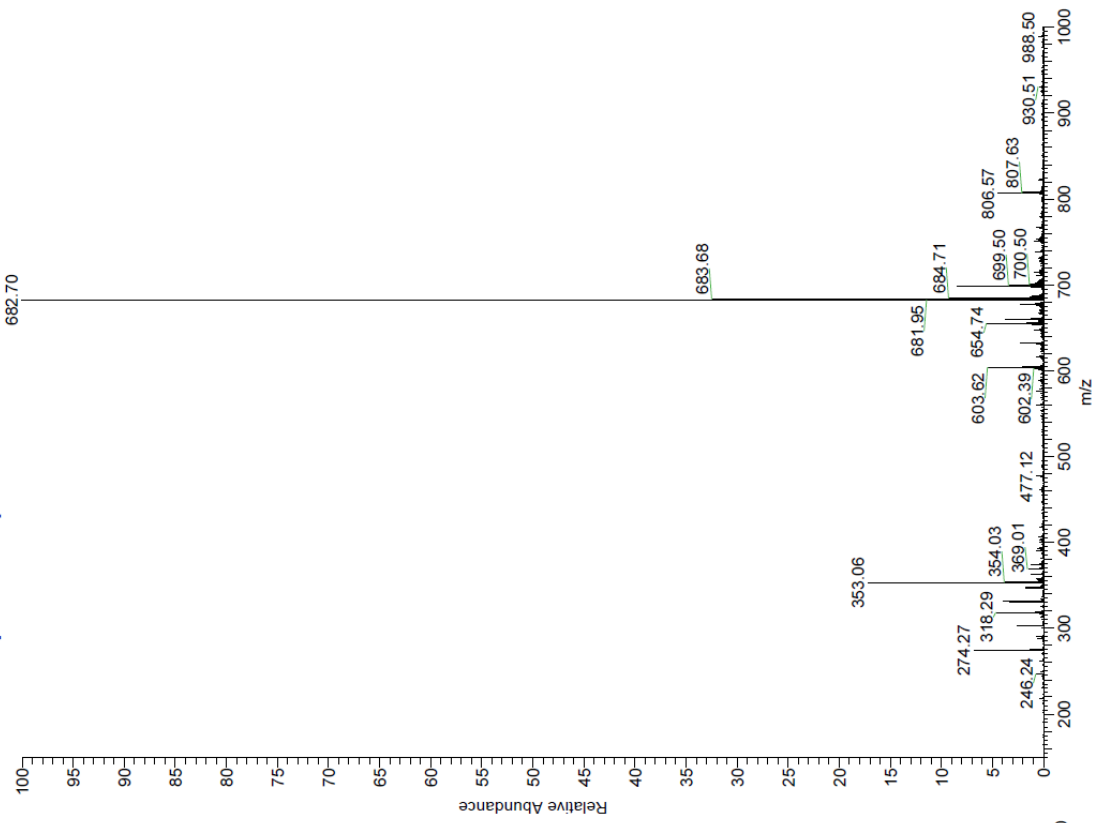

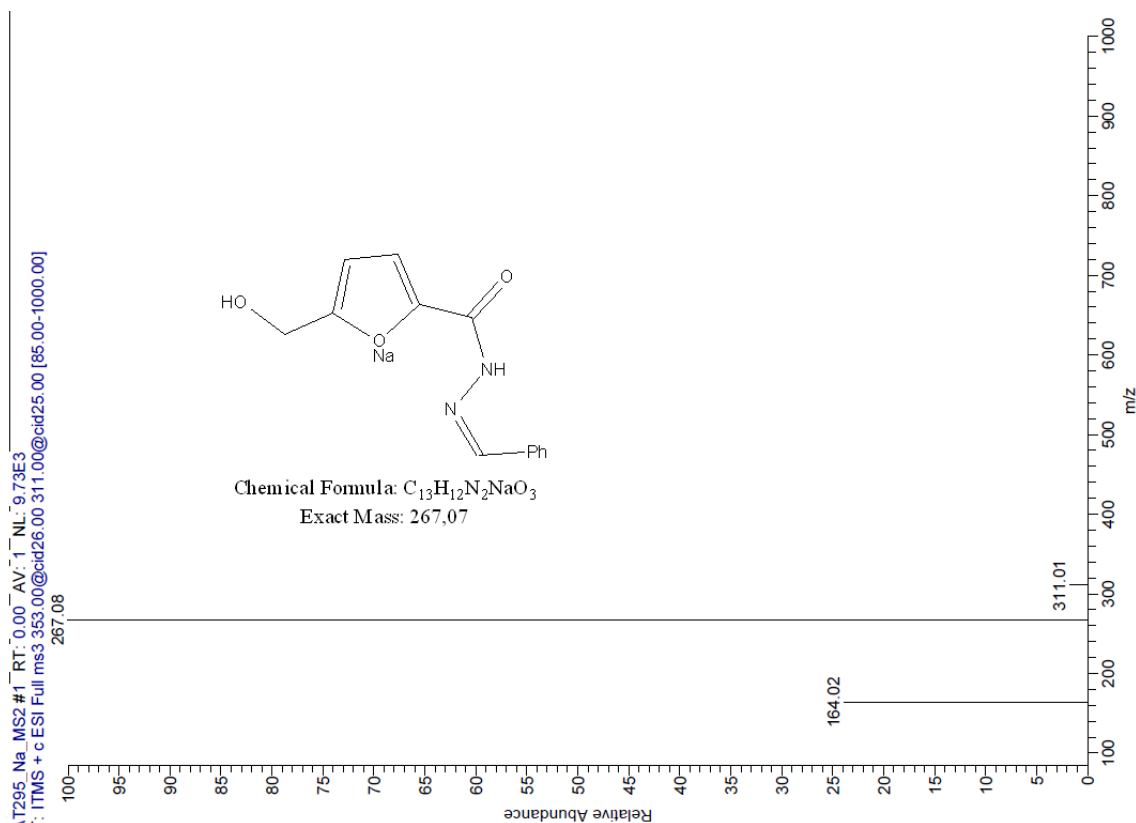

Page 1

### Elemental Composition Report

#### Multiple Mass Analysis: 46 mass(es) processed - displaying only valid results

Tolerance = 5.0 PPM / DBE: min = -1.5, max = 100.0

Selected filters: None

Monoisotopic Mass, Odd and Even Electron Ions

49 formula(e) evaluated with 1 results within limits (up to 50 best isotopic matches for each mass)

Elements Used:

C: 17-17 H: 19-19 N: 2-2 O: 5-5 127I: 0-1

AFONSO IEA\_CARLOS\_AT295\_331  
 AFONSO IEA\_CARLOS\_AT295\_331 12 (1.041) Cm (12:13)  
 Voltage E1+

UNIDADE DE MASAS E PROTEOMICA\_USC  
 18-Mar-2014  
 2.09e3

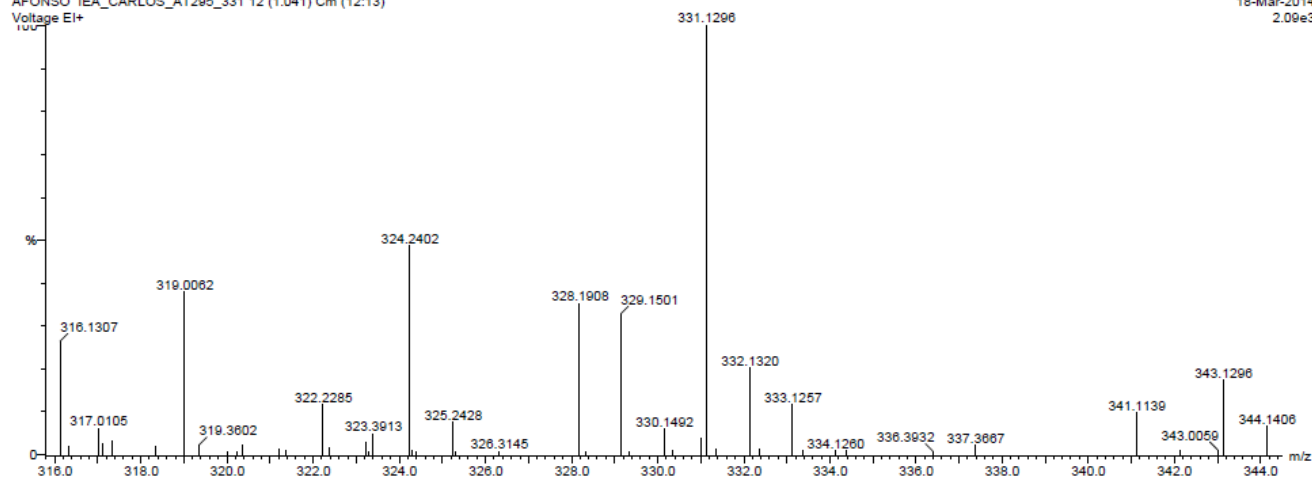

| Mass     | RA     | Calc. Mass | mDa | PPM | DBE | i-FIT | Formula       |
|----------|--------|------------|-----|-----|-----|-------|---------------|
| 331.1296 | 100.00 | 331.1294   | 0.2 | 0.6 | 9.5 | 66.3  | C17 H19 N2 O5 |

### Methyl 2-(2-(5-(hydroxymethyl)furan-2-carbonyl)hydrazono)-2-(naphthalen-1-yl)acetate13

Isolated as a yellow powder (26 mg, 31 % yield), isolated as an inseparable mixture of geometric isomers 1:9. The broadening of N-H does not allow the determination which isomer is the major.

<sup>1</sup>H NMR (400 MHz, CDCl<sub>3</sub>) δ 8.03-7.94 (2H, m, naphthalene H2 and H4 position), 7.61-7.52 (5H, m, naphthalene H3, H5, H6, H7 and H8), 7.20-6.42 (2H, m, furan protons), 4.68-4.52 (2H, m, HOCH<sub>2</sub>) 3.89



(3H, s, OCH<sub>3</sub>).<sup>13</sup>C NMR (101 MHz, CDCl<sub>3</sub>) δ 164.20(COOCH<sub>3</sub>), 133.79, 131.18, 129.69, 129.09, 127.92, 127.36, 127.07, 125.64, 124.02, 119.79(furan C ortho to carbonyl), 109.91-109.44 (furan C meta to carbonyl), 57.45-57.34(HOCH<sub>2</sub>), 53.15 (COOCH(CH<sub>3</sub>)).

MS (ESI+, M+Na)=375.1; MS (ESI+, 375.1)=315.1(loss of 2 formaldehydes). HRMS (ESI-TOF, M+Na) calc. 375.0957 found 375.0955.

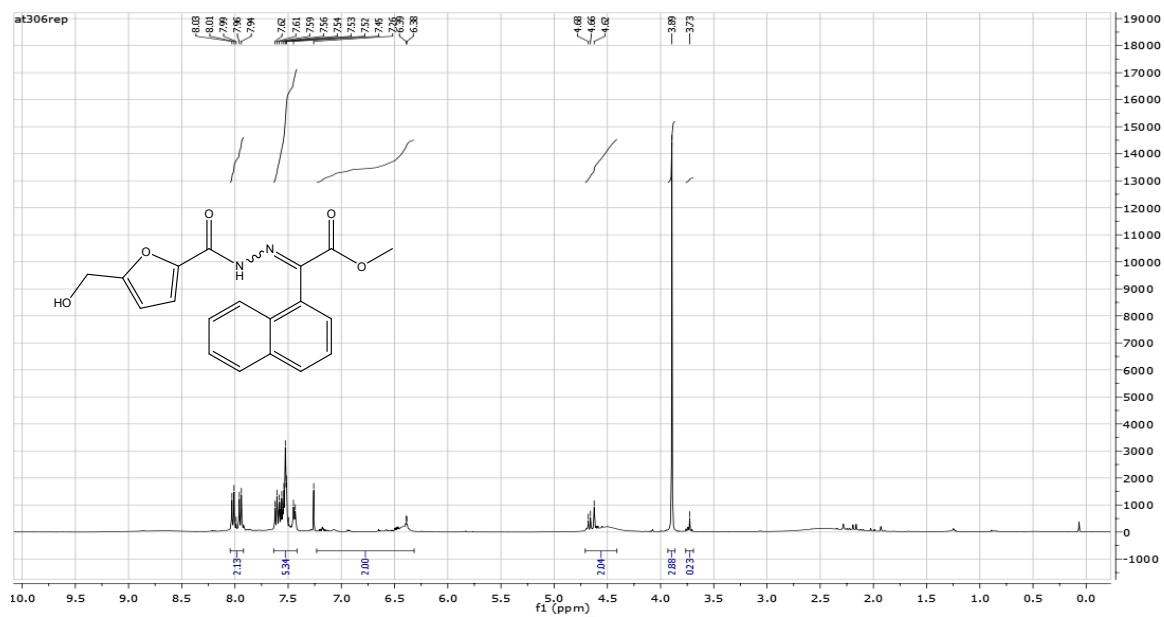

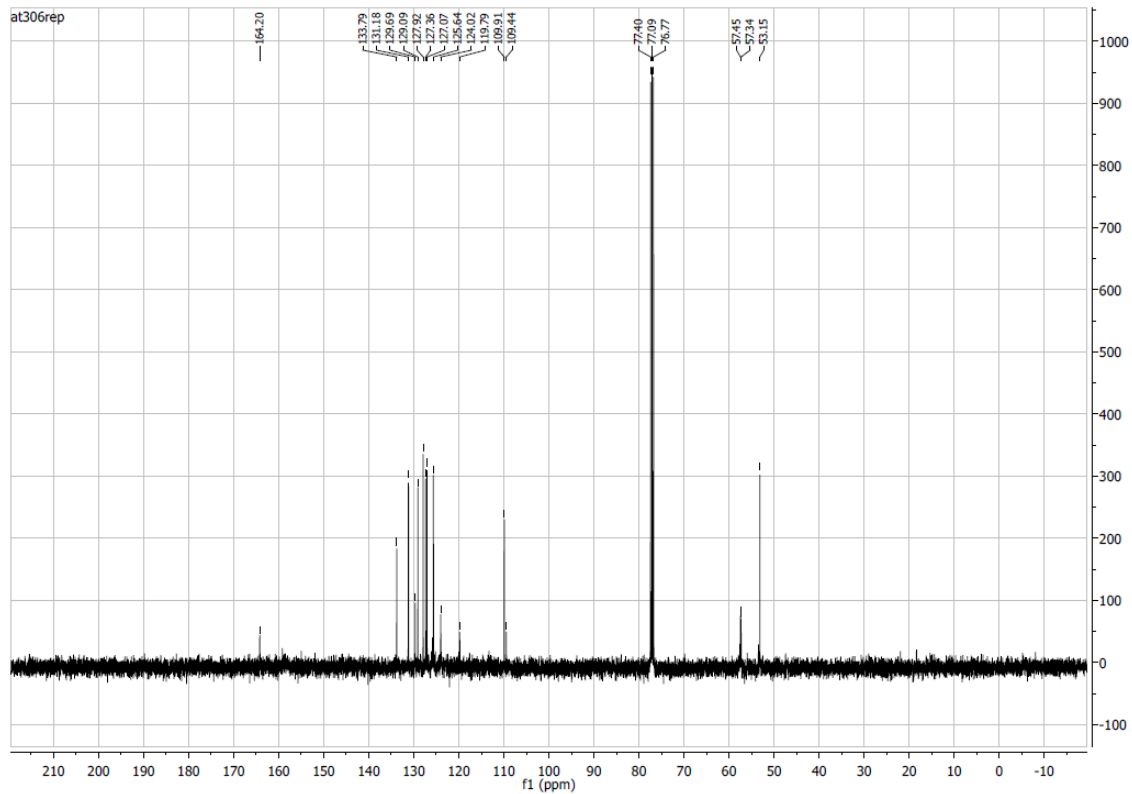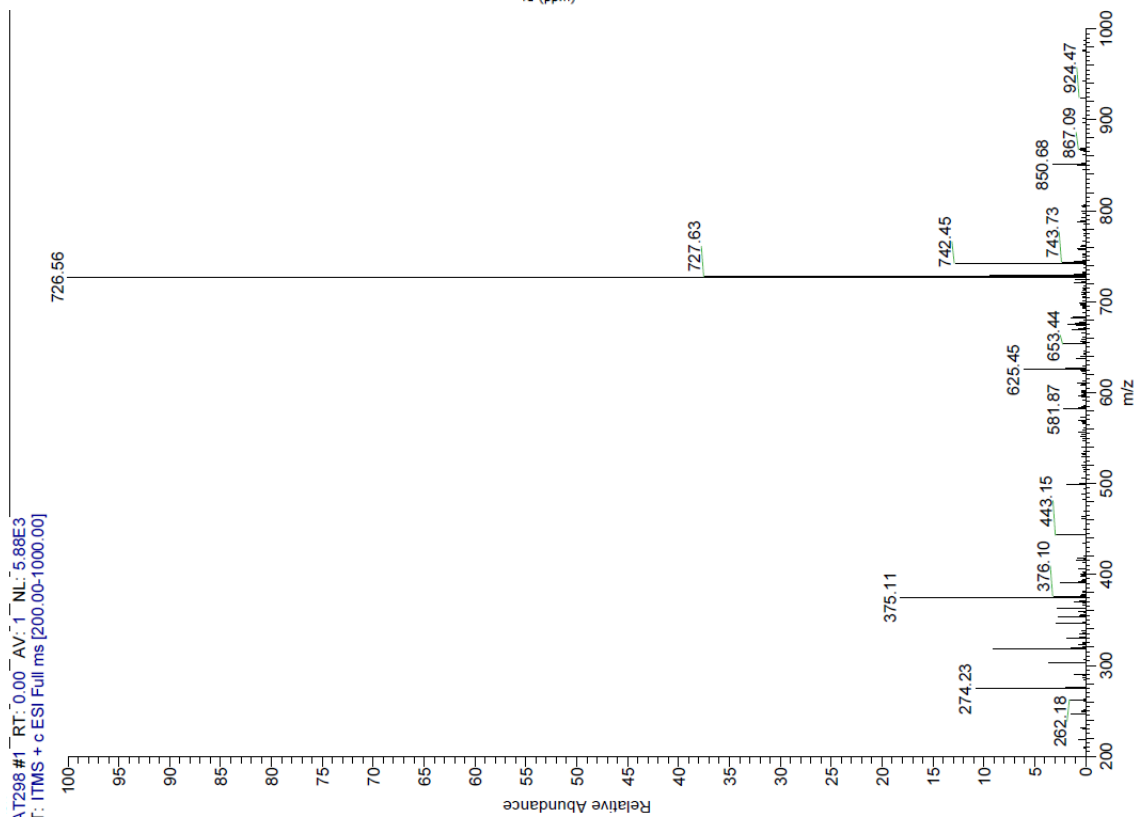

LT298\_MS#1\_RT: 0.00\_AV: 1\_NL: 6.72E1  
F: ITMS + c ESI Full ms2 375.00@cid32.00 [100.00-1000.00]

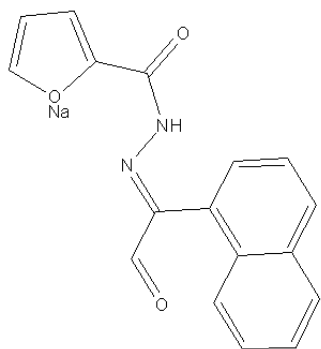

Chemical Formula: C<sub>17</sub>H<sub>12</sub>N<sub>2</sub>NaO<sub>3</sub>  
Exact Mass: 315,07

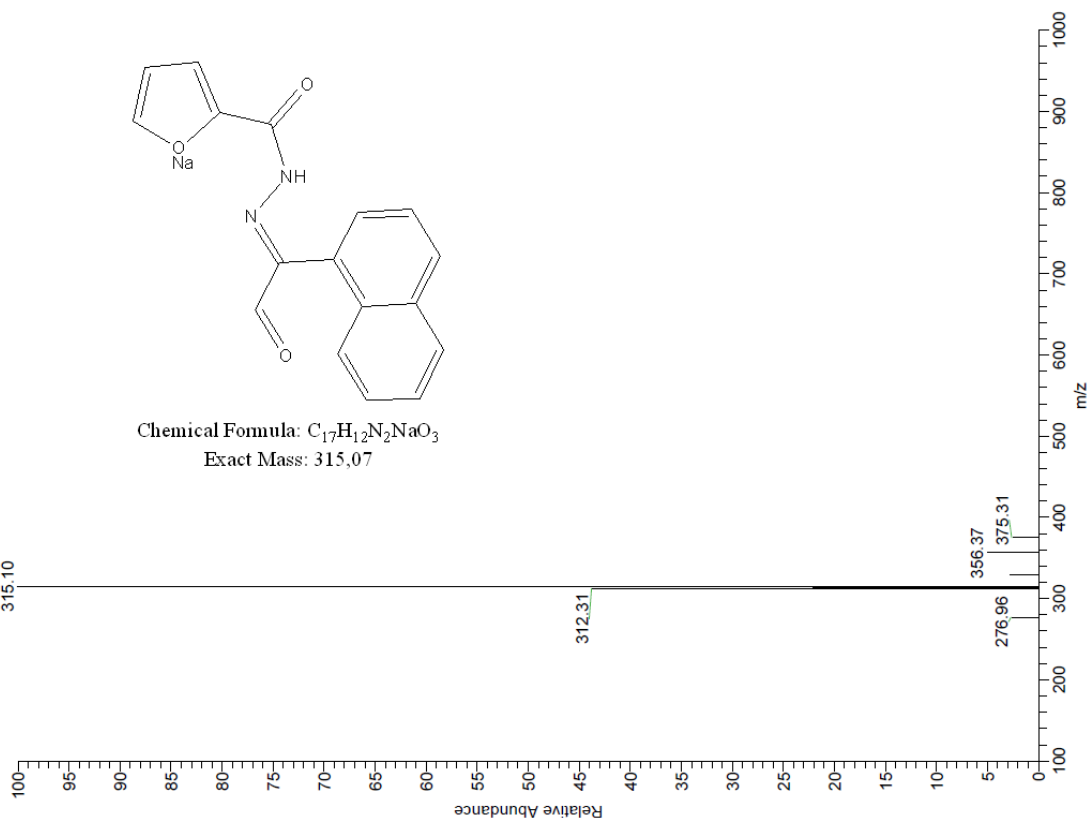

## ESPECTRO ESI-FIA-TOF-Medida de Masas Exactas

### Analysis Info

Sample Name AT298\_352\_1-E\_4\_01\_13227.d  
Method fia\_pos\_bajo\_50-450\_egf.m

Acquisition Date 3/19/2014 12:17:10 PM  
Instrument micrOTOF

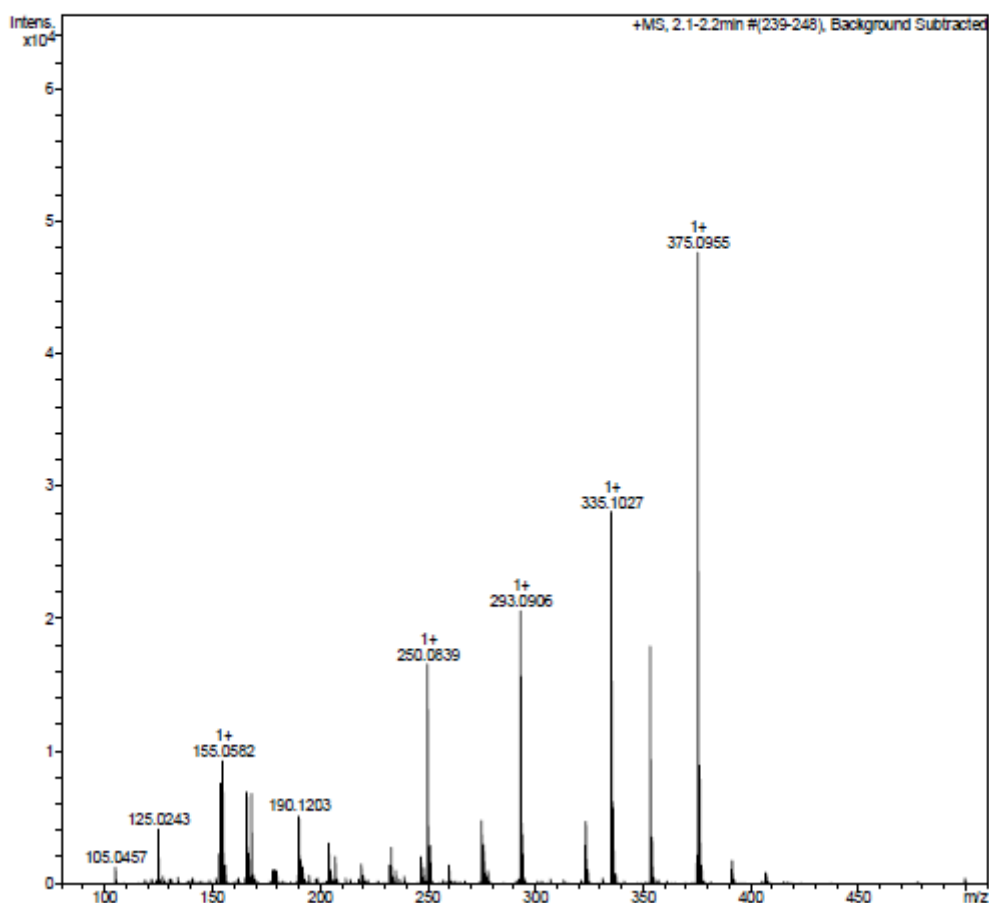

### Ethyl 2-(2-(5-(hydroxymethyl)furan-2-carbonyl)hydrazono)-2-(4-tolyl)acetate 14

Isolated as a slightly yellow oil (33 mg, 42 % yield) isolated as an inseparable mixture of geometric isomers 1:9. The broadening of N-H does not allow the determination which isomer is the major.

<sup>1</sup>H NMR (400 MHz, CDCl<sub>3</sub>) δ 7.37-7.23 (5H, m, protons 8,9,11 and 12 and proton 18), 6.47 (1H, m, proton 17), 4.70-4.66 (2H, m, proton 21), 4.39-4.34 (2H, quartet, proton 13), 2.43 (3H, proton 24), 1.40-1.37 (3H, t, proton 23). <sup>13</sup>C NMR (101 MHz, CDCl<sub>3</sub>) δ 163.68 (C1), 158.84 (C19), 140.97 (C7), 130.26 (C8+C12), 128.22 (C9+C11), 119.78 (C17), 109.85 (C18), 62.16 (C21), 57.46 (C13), 21.49 (C24), 14.18 (C23). C2, C7, C14 and C16 do not appear with more accumulation time.

Elementar analysis for (C<sub>17</sub>H<sub>18</sub>N<sub>2</sub>O<sub>5</sub>)<sub>4</sub>H<sub>2</sub>O calc. %C 60.98; %H 5.57; %N 8.37 found %C 61.24; %H 5.31; %N 7.99.

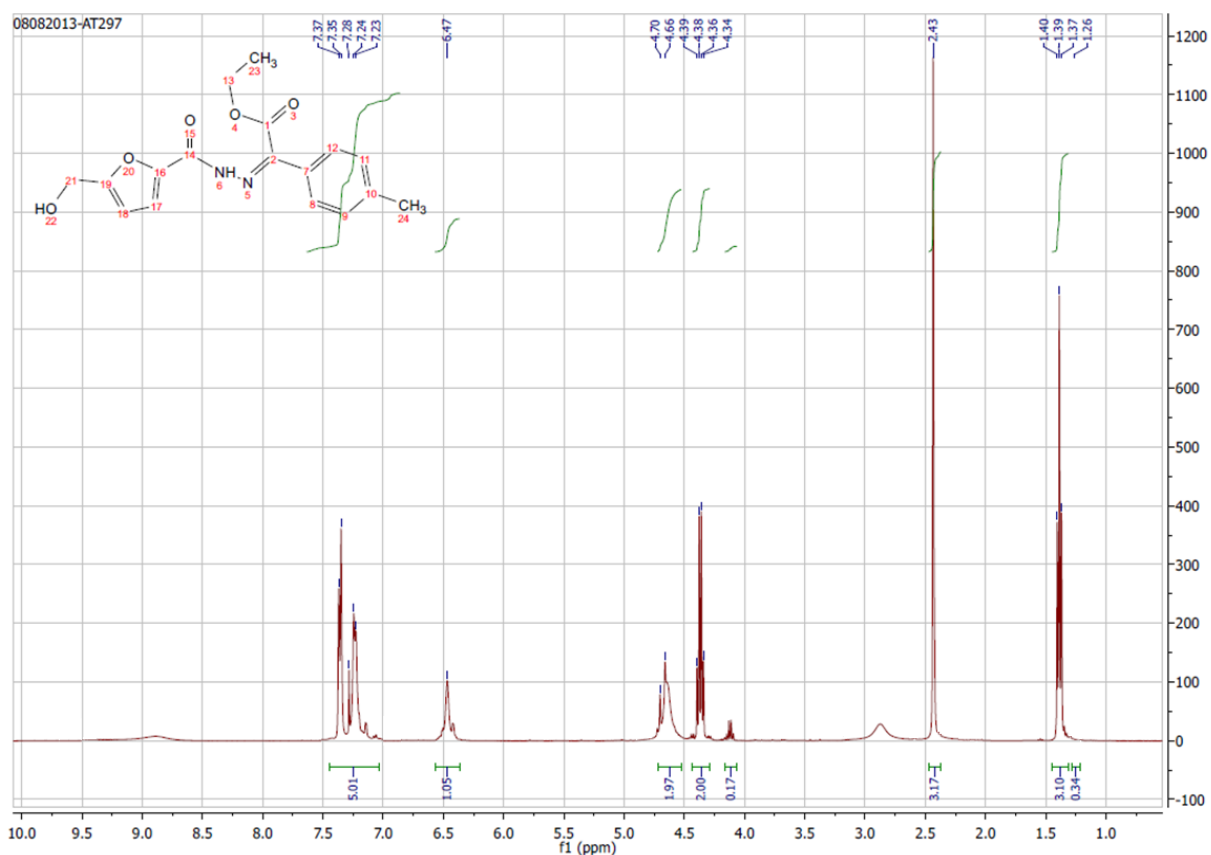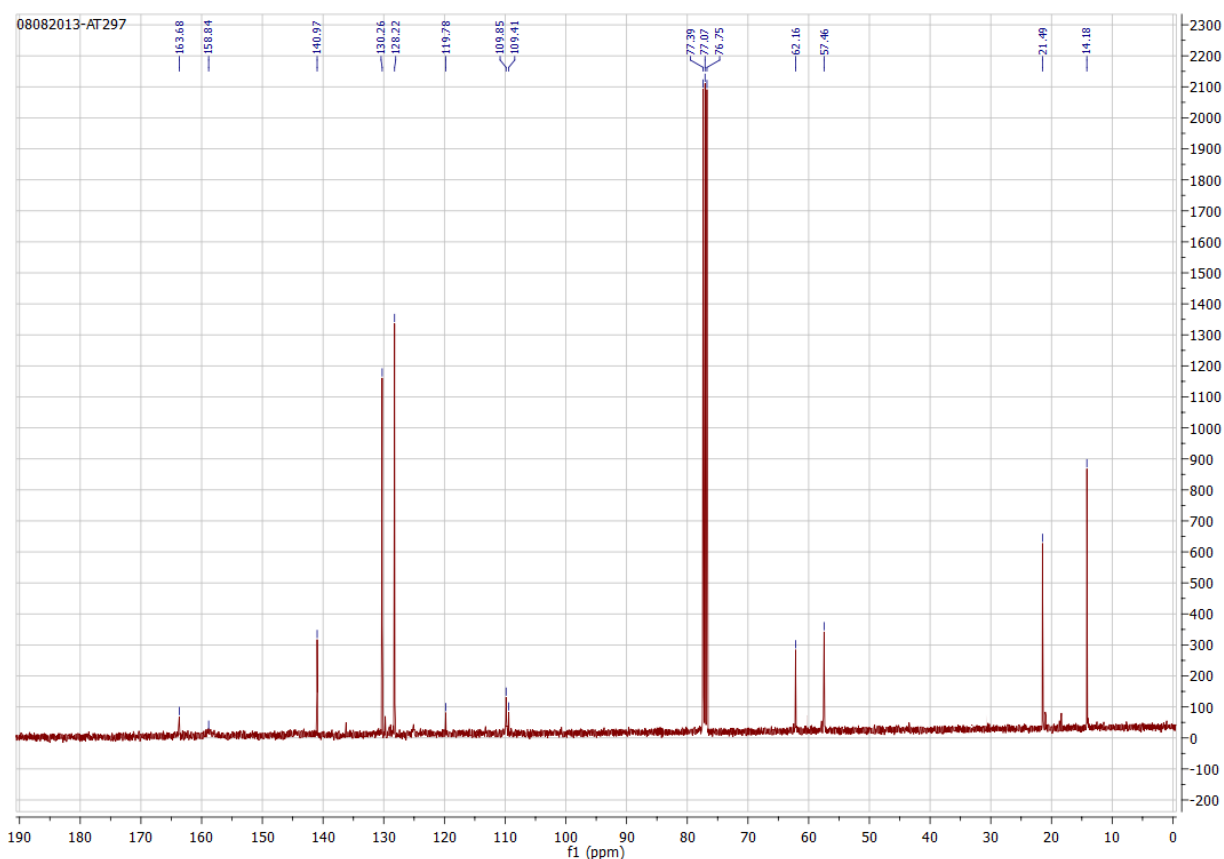

**Ethyl 2-(4-bromophenyl)-2-(2-(5-(hydroxymethyl)furan-2-carbonyl)hydrazono)acetate 15**

Isolated as a slightly yellow powder (58 mg, 64 % yield) isolated as an inseparable mixture of geometric isomers 1:9. The broadening of N-H does not allow the determination which isomer is the major.

<sup>1</sup>H NMR (400 MHz, CDCl<sub>3</sub>) δ 7.69-7.67 (2H, d, protons 9-11), 7.28-7.23 (3H, m, protons 8, 12 and 17), 6.44 (1H, m, proton 18), 4.67-4.60 (2H, m, proton 21), 4.37-4.31 (2H, quartet, proton 13), 3.36 (1H, bs,

OH), 1.37-1.24 (3H, proton 23).  $^{13}\text{C}$  NMR (101 MHz,  $\text{CDCl}_3$ )  $\delta$  177.63 (C14), 163.25 (C1), 157.93 (C19), 152.19 (C16), 143.02 (C7), 132.82 (C9-C11), 130.13 (C8-C12), 125.14 (C10), 120.01 (C17), 109.85(C18), 62.36 (C21), 57.31 (C13), 14.14 (C23). C2 does not appear with more accumulation time. Elemental analysis for  $(\text{C}_{16}\text{H}_{15}\text{BrN}_2\text{O}_5)_3\text{H}_2\text{O}$  calc. %C 47.90; %H 3.94; %N 6.98 found %C 48.05; %H 3.72; %N 6.62.

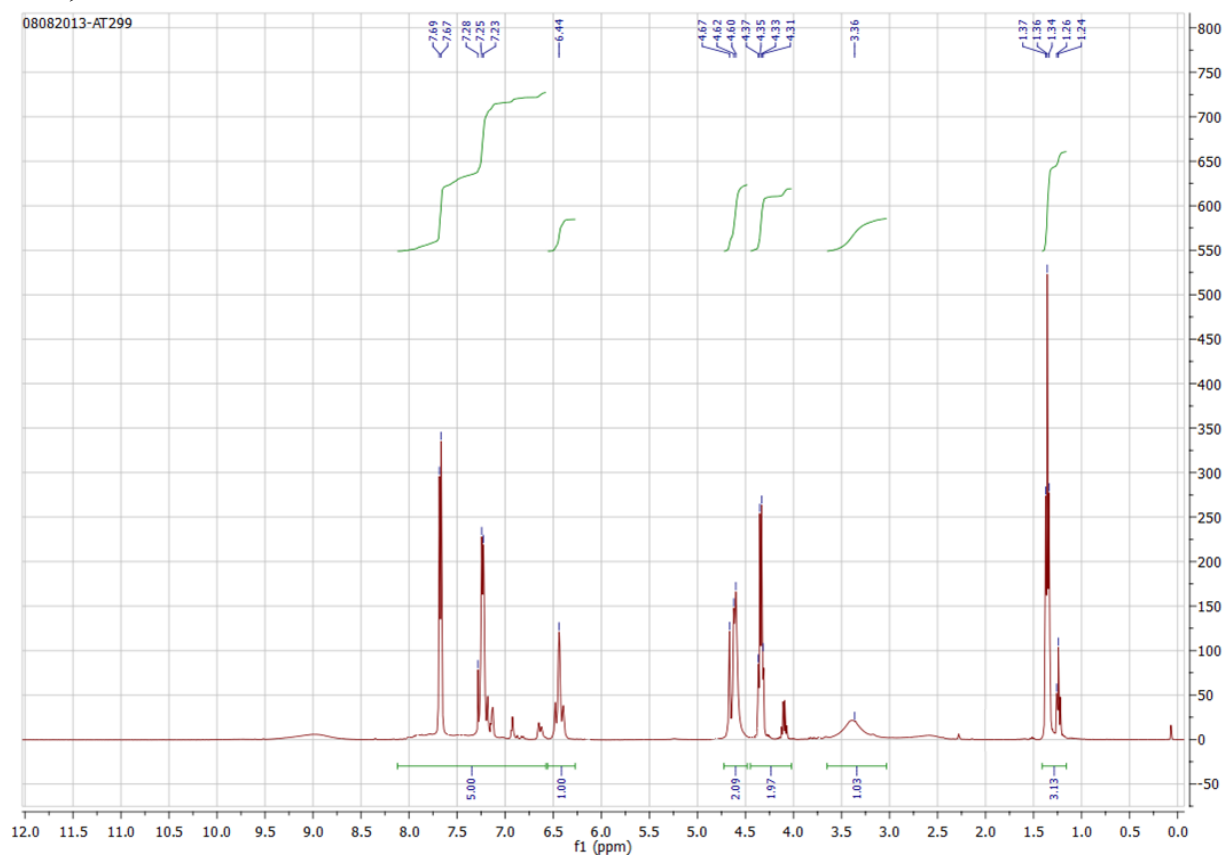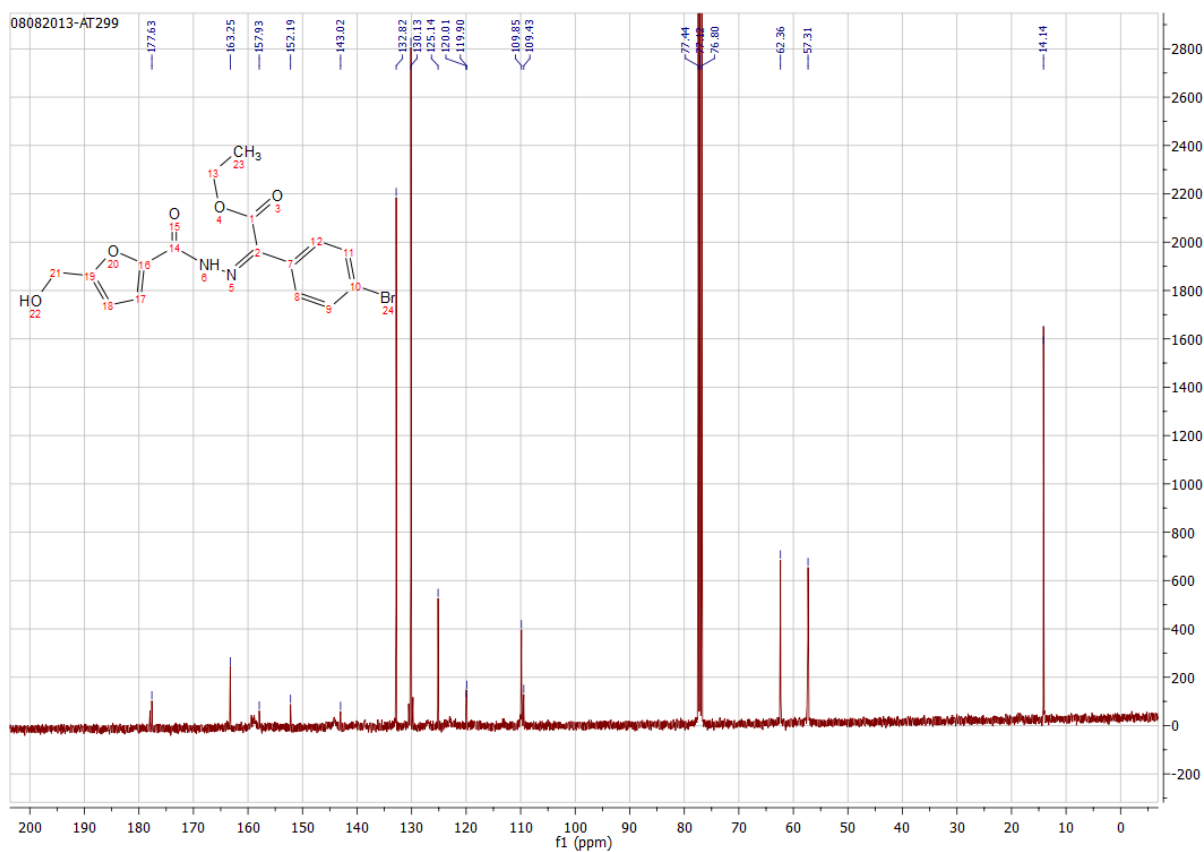

### Dimethyl 2,2'-(2,2'-(furan-2,5-dicarbonyl)bis(hydrazin-2-yl-1-ylidene))bis(2-phenylacetate)16

Isolated as a yellow powder (60 mg, 53 % yield) isolated as an inseparable mixture of 3 geometric isomers 4:8:8.

$^1\text{H}$  NMR (400 MHz,  $\text{CDCl}_3$ )  $\delta$  10.0-7.93 (2H, three bs, N-H), 7.54-6.50 (12H, m, phenyl + furan ring), 3.90 (6H, s, methyl ester).  $^{13}\text{C}$  NMR (101 MHz,  $\text{CDCl}_3$ )  $\delta$  163.89 (ester carbonyl), 130.83 (Ph para), 129.71 (Ph ortho), 128.24 (Ph meta), 53.12 (methyl ester).

MS (ESI+, M+H)=477.1; MS(ESI+, 477.1)=417 (loss of 2 formaldehyde); MS(ESI+, 417)=270 (loss 1 hydrazone); MS(ESI+, 270)=213 (loss 2 CO). HRMS(ESI+, M+H) calc. 477.1410 found.477.1404

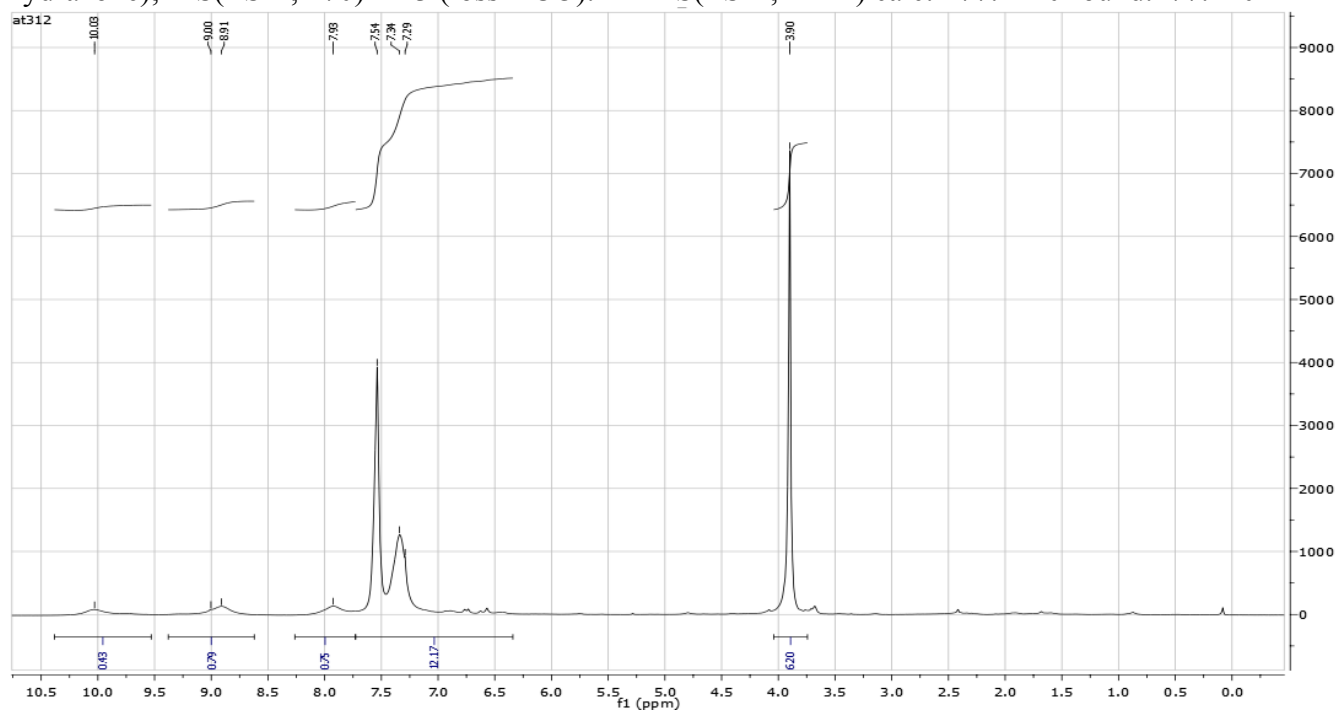

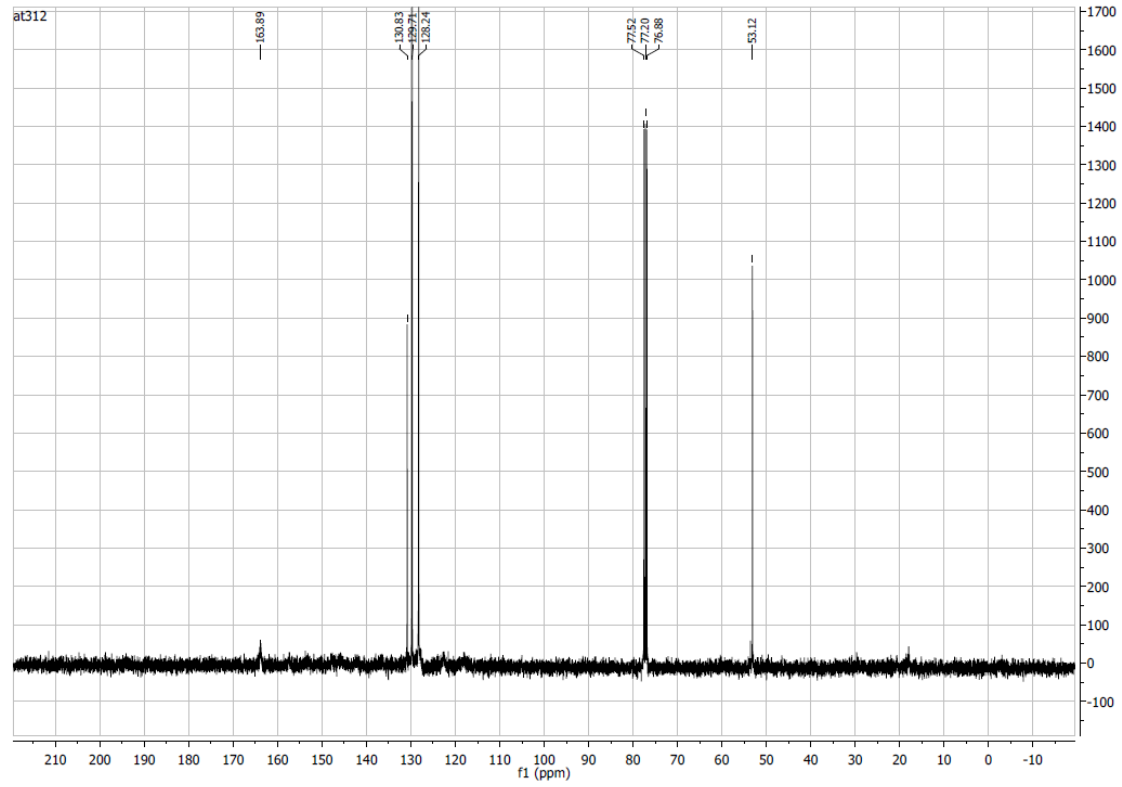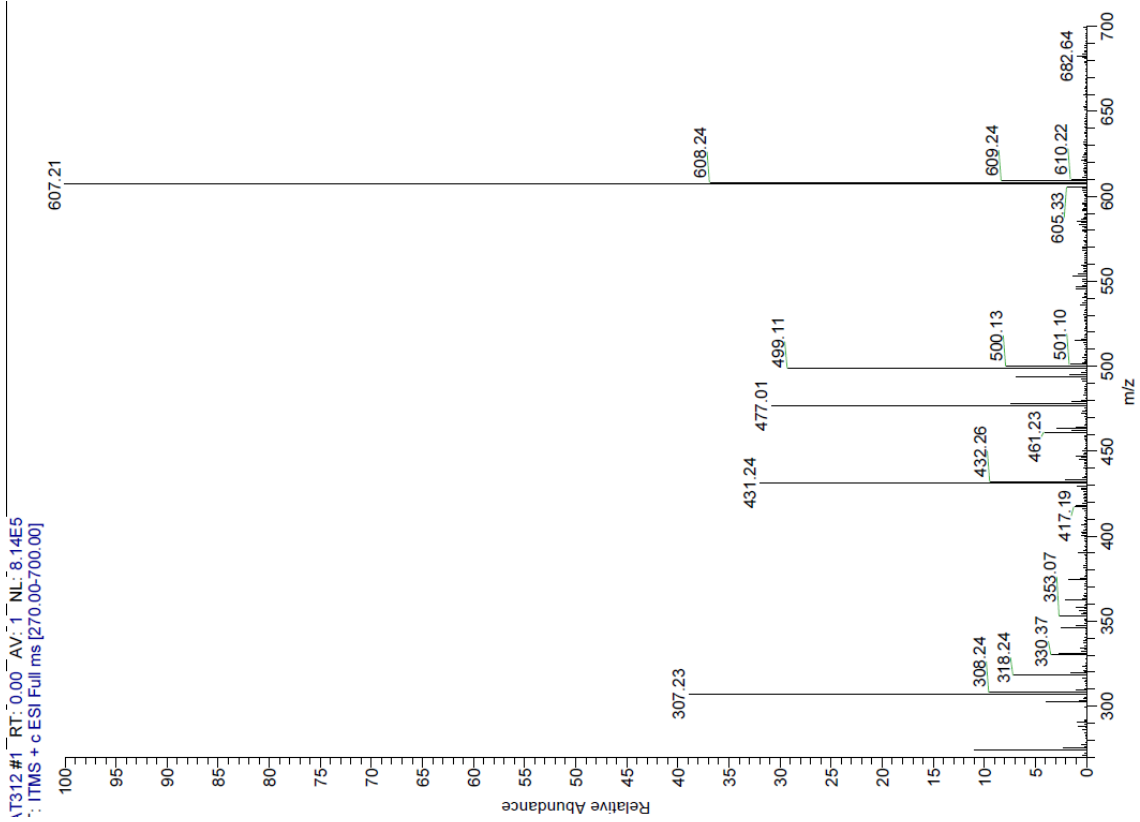



LT312\_MS2#1\_RT: 0.00\_AV: 1\_NL: 2.37E4  
ITMS + c ESI Full ms3 477.00@cid25.00 [110.00-700.00]

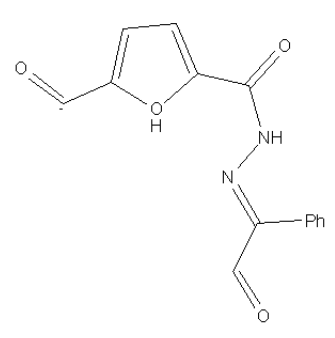

Chemical Formula:  $C_{14}H_{10}N_2O_4$   
Exact Mass: 270,06

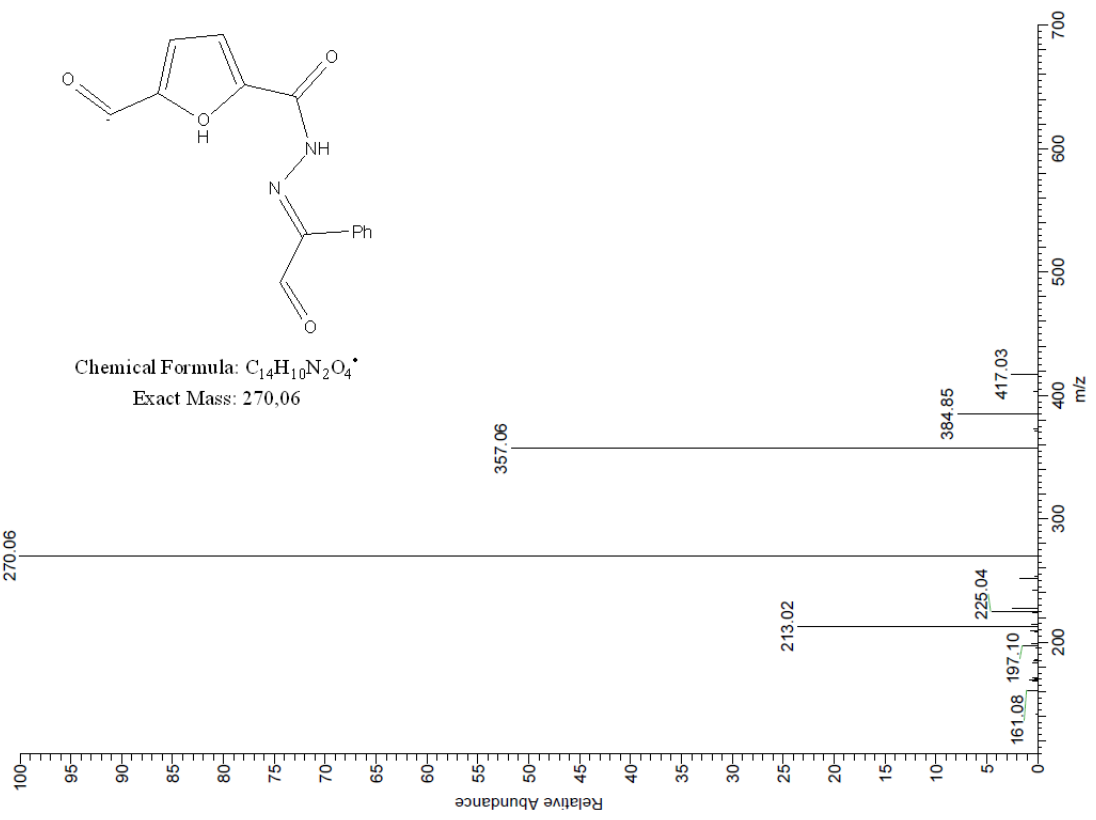

LT312\_MS#1\_RT: 0.00\_AV: 1\_NL: 9.57E4  
ITMS + c ESI Full ms2 477.00@cid25.00 [130.00-700.00]

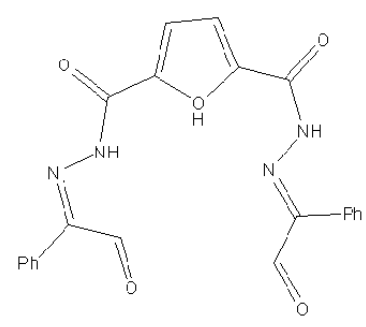

Chemical Formula:  $C_{22}H_{17}N_4O_5$   
Exact Mass: 417,12

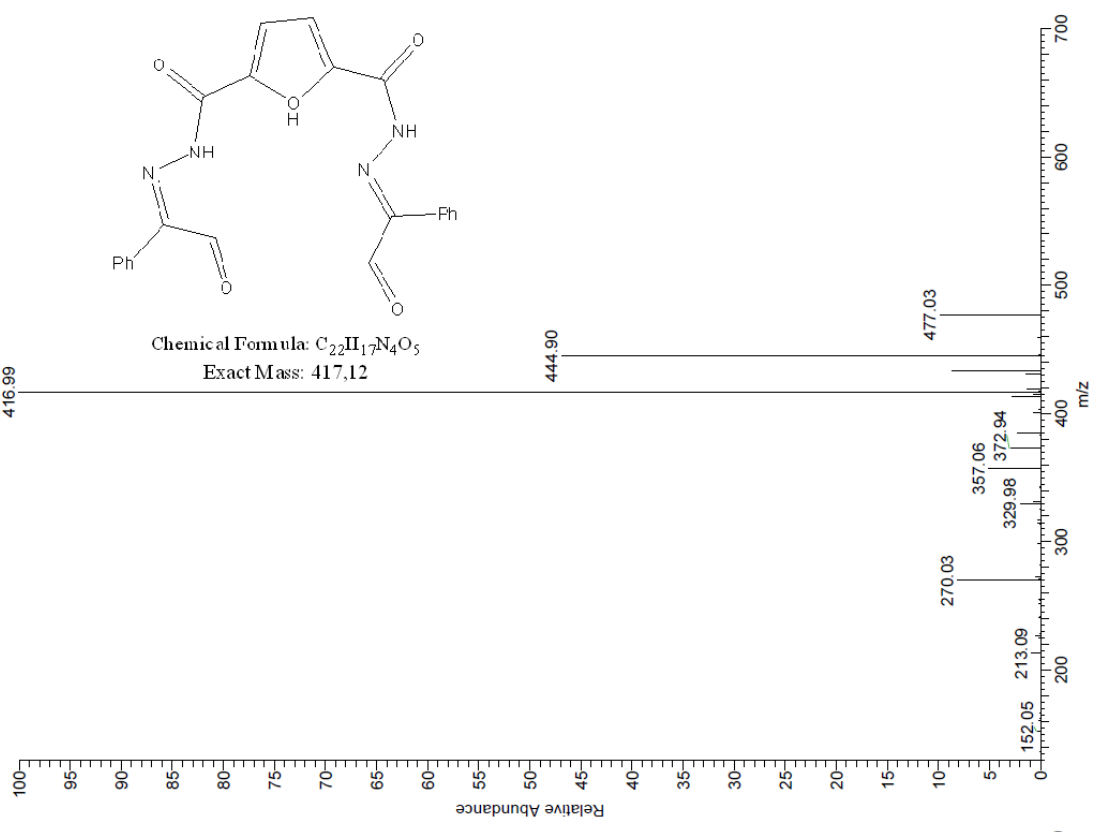

IT312\_MS3 #1\_RT: 0.00\_AV: 1\_NL: 9.73E3  
ITMS + c ESI Full ms4.477.00@cid25.00@cid426.00 270.00@cid30.00 [70.00-700.00]

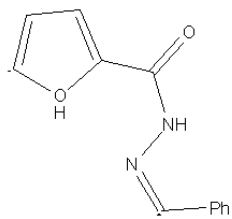

Chemical Formula:  $C_{12}H_9N_2O_2^{2+}$   
Exact Mass: 213.07

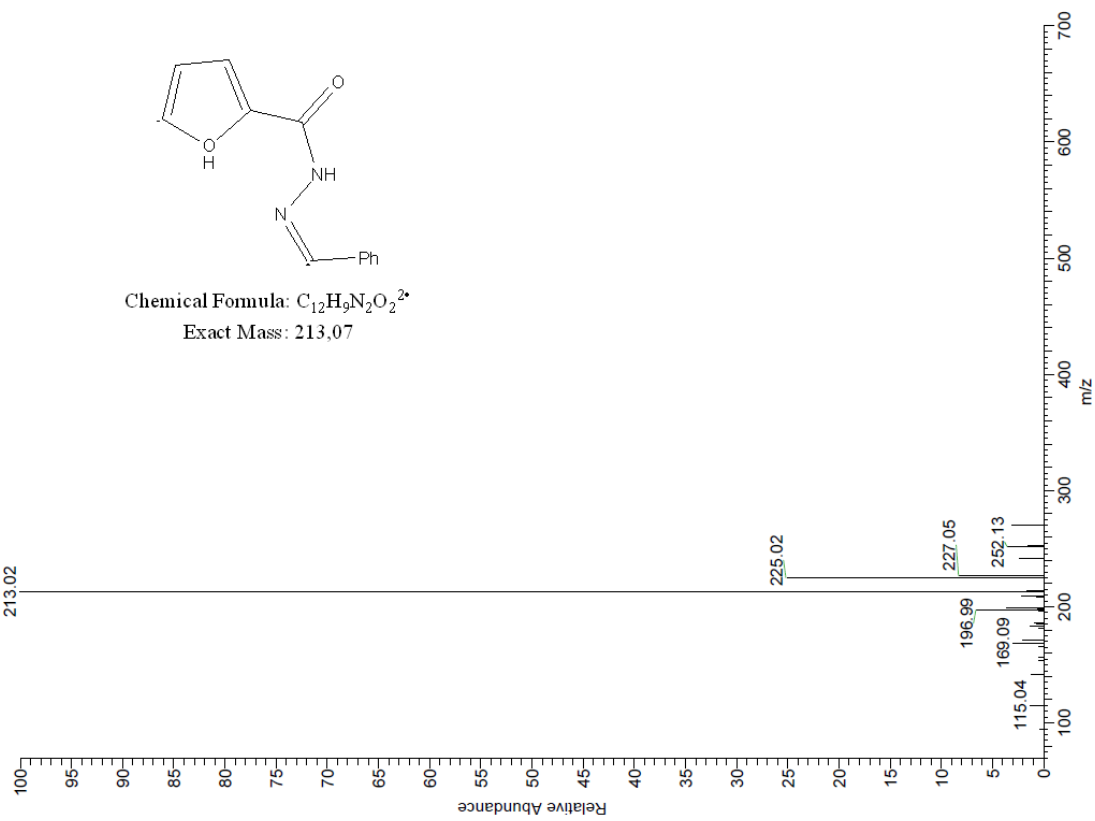

## ESPECTRO ESI-FIA-TOF-Medida de Masas Exactas

### Analysis Info

Sample Name AT312\_476\_1-B,2\_01\_13144.d  
Method fia\_pos\_medio\_350-1500\_egf.m

Acquisition Date 3/12/2014 2:22:01 PM  
Instrument micrOTOF

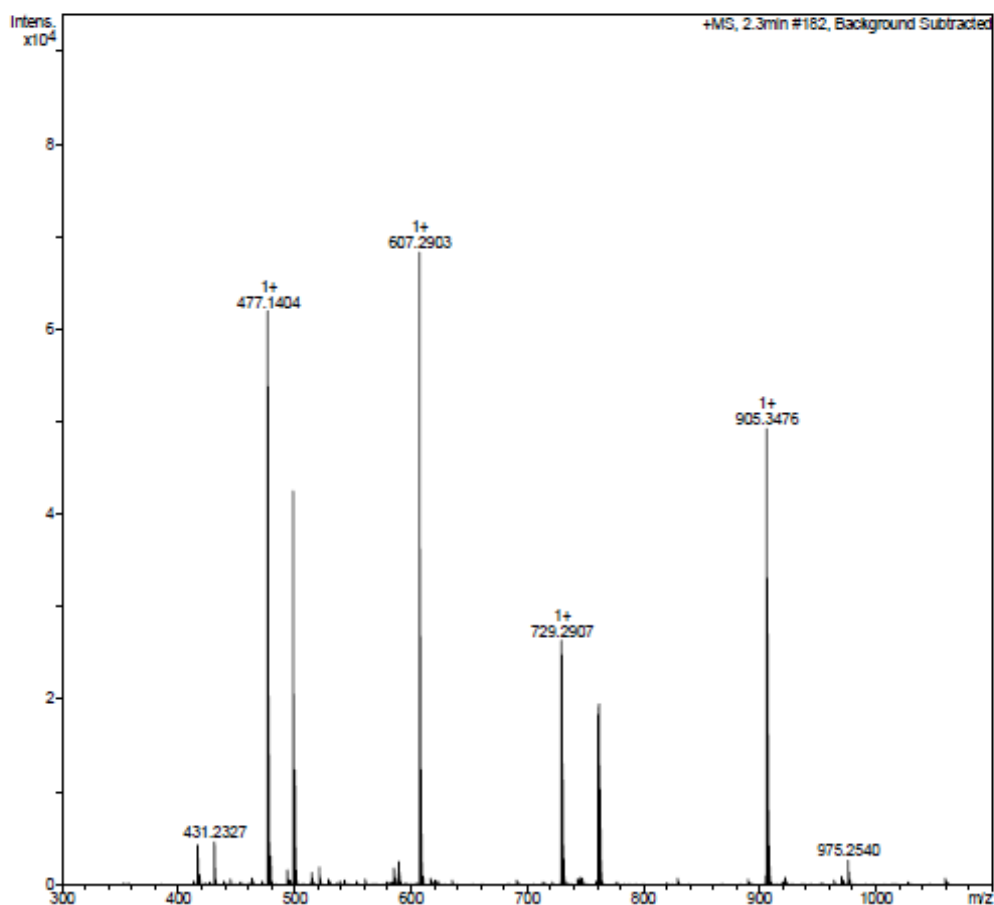

### **(E)-(5-(2-(2-methoxy-2-oxo-1-phenylethylidene)hydrazinecarbonyl)furan-2-yl)methyl benzoate**17

Isolated as a slightly yellow oil (2 mg, 3 % yield) as a single isomer.

<sup>1</sup>H NMR (400 MHz, DMSO) δ 10.17 (bs, NH), 7.98-7.92 (2H, m, ortho H benzoyl group), 7.71-7.44 (8H,m, remaining H from Ph and Bz), 7.01-6.93 (1H, m, furan ring H ortho to carbonyl), 6.84-6.36 (1H, m, furan ring H meta to carbonyl), 3.81 (2H, m, methylene Hs).

Was not possible to recover the compound from DMSO for further characterizations in pure form.

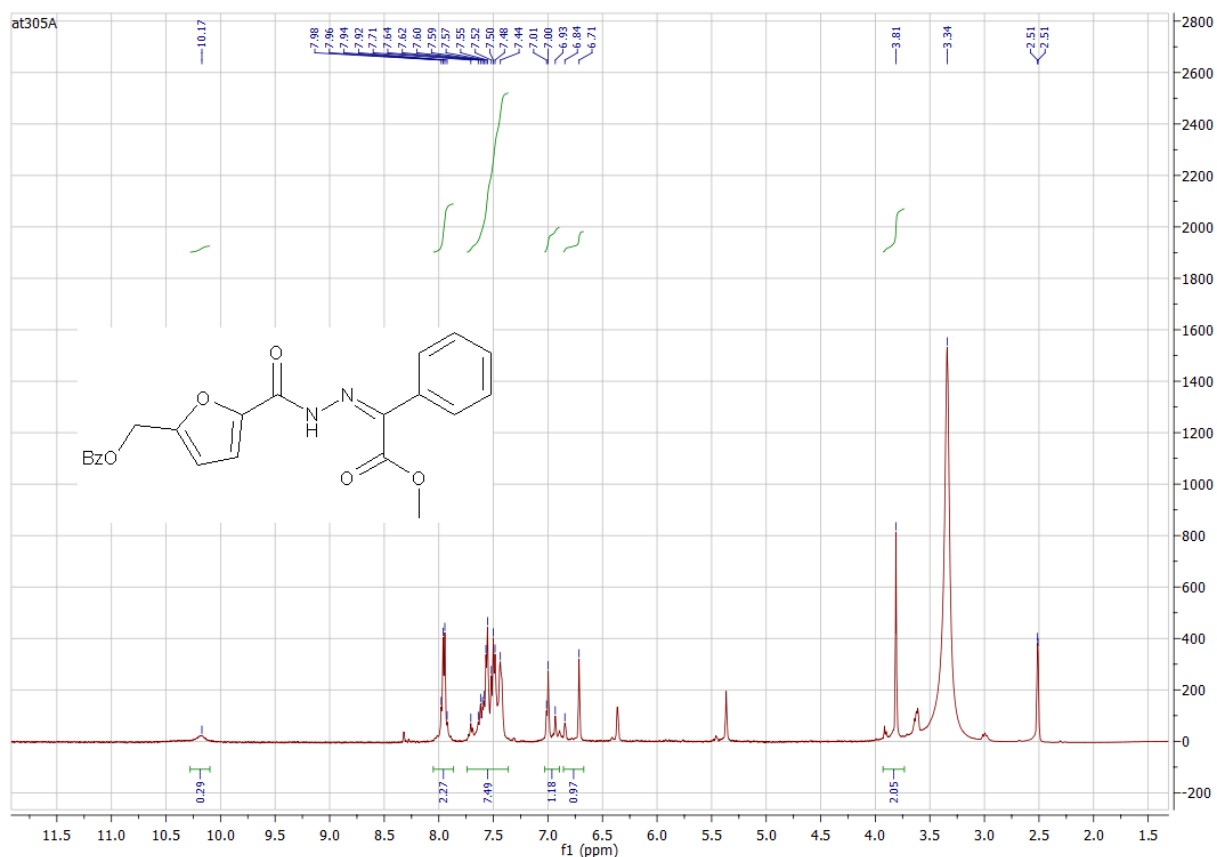

### 5-(2-(2-methoxy-2-oxo-1-phenylethylidene)hydrazinecarbonyl)furan-2-ylmethyl hexanoate 18

Isolated as a yellow powder (12 mg, 13 % yield) as a single isomer.

$^1\text{H}$  NMR (400 MHz,  $\text{CDCl}_3$ )  $\delta$  7.60-7.58(3H, m, Ph ortho + para), 7.38(2H, bs, Ph meta), 6.96-6.57(2H, m, furan ring), 5.06 (2H, bs,  $\text{HxOCH}_2$ ), 3.94 (3H, s,  $\text{COOCH}_3$ ), 2.35-2.28 (2H, t,  $\text{CH}_2\text{CO}$ ), 1.68-1.60 (2H, quintet,  $\text{CH}_2\text{CH}_2\text{CO}$ ), 1.36-1.26 (4H, m,  $\text{CH}_2\text{CH}_2\text{CH}_3$ ), 0.93-0.89 (3H, t,  $\text{CH}_2\text{CH}_3$ ).  $^{13}\text{C}$  NMR (101 MHz,  $\text{CDCl}_3$ )  $\delta$  130.87 (Ph), 129.82 (Ph), 128.41 (Ph), 112.75 (furan C meta to carbonyl), 53.19 ( $\text{HxOCH}_2$ ), 34.07 ( $\text{CH}_2\text{CH}_2\text{CO}$ ), 31.35 ( $\text{CH}_2\text{CH}_2\text{CO}$ ), 24.61 ( $\text{CH}_2\text{CH}_2\text{CH}_3$ ), 22.39 ( $\text{CH}_2\text{CH}_3$ ), 14.01 ( $\text{CH}_2\text{CH}_3$ ).

MS (ESI+,  $\text{M}+\text{M}+\text{Na}$ )=822.7; MS (ESI+,  $\text{M}+\text{Na}$ )=423.2; MS (ESI+, 423)=363.1; MS (ESI+, 363.1)=225.0; MS (ESI+, 225.0)=141.0. The fragmentation pattern suggest the gradual loss of the molecule functional groups, however rearrangements may take place. HRMS( $\text{M}+\text{Na}$ ) calc. 423.1532 found. 423.1516

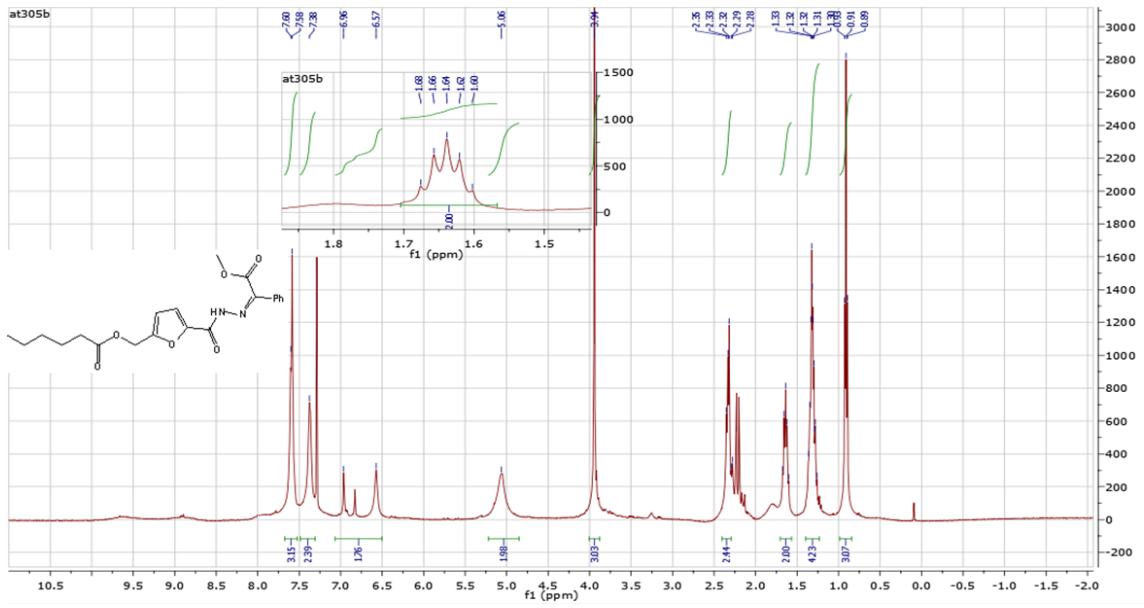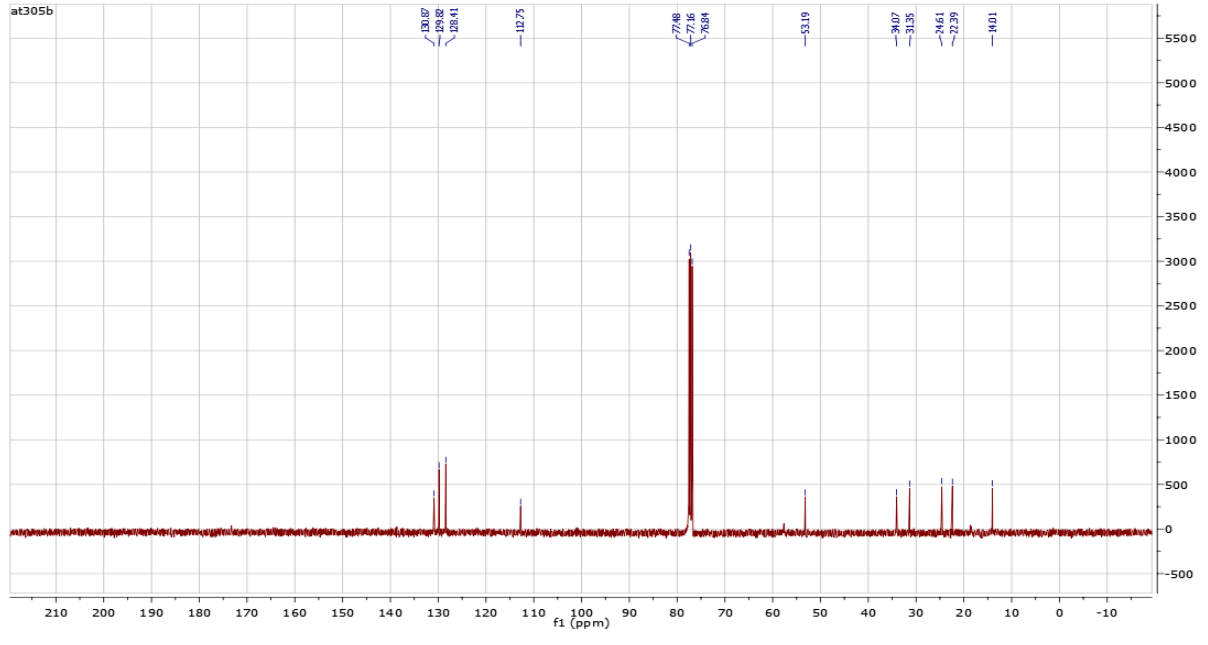

AT305B\_Na\_MS#1\_RT: 0.00\_AV: 1\_NL: 1.96E3  
T: ITMS + c ESI Full ms2.423.00@cid33.00 [115.00-1000.00]

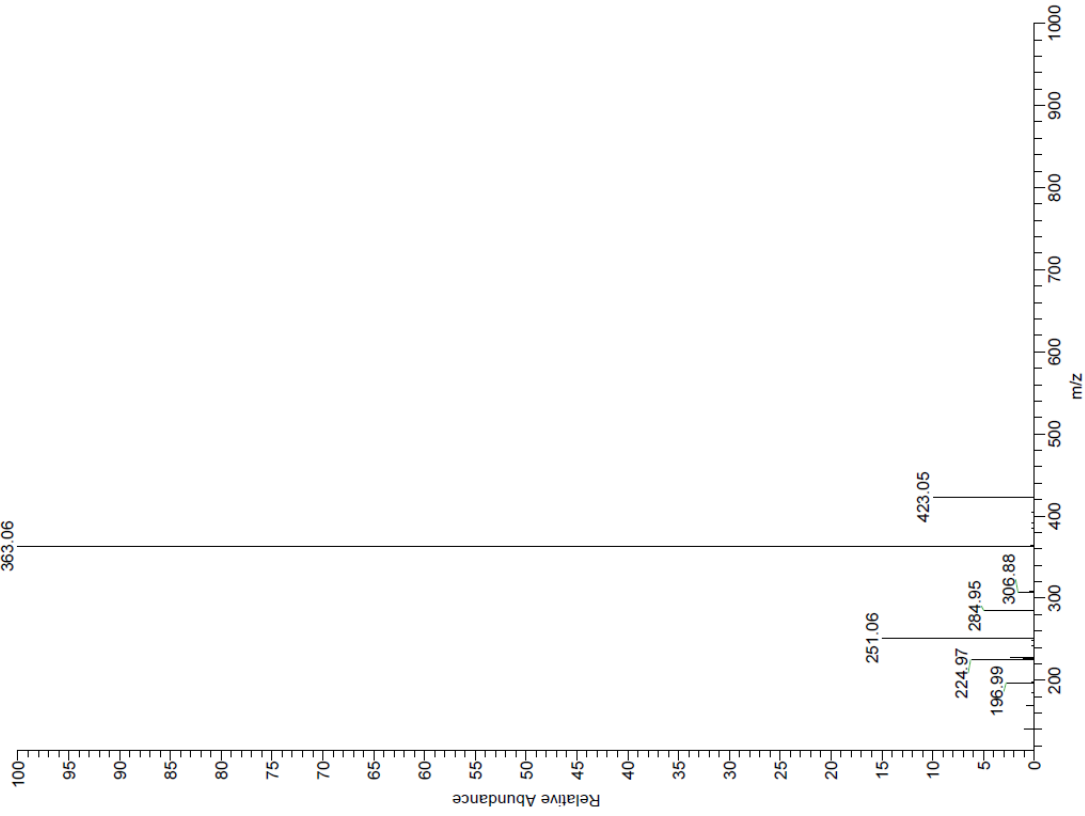

IT305B#1\_RT: 0.00\_AV: 1\_NL: 1.42E6  
T: ITMS + c ESI Full ms [270.00-1000.00]

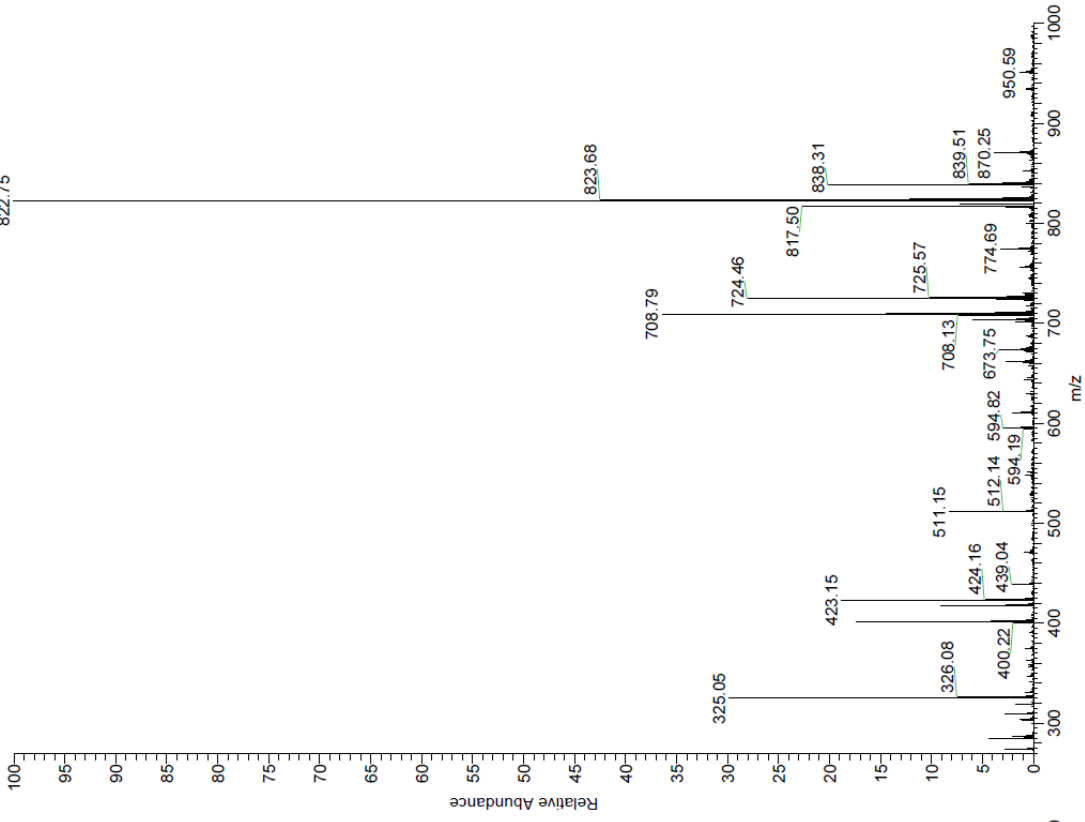

λ1305B\_Na\_MS3 #1\_RT: 0.00\_AV: 1\_NL: 6.21E1  
F: ITMS + c ESI Full ms4 423.00@cid33.00 363.00@cid30.00 225.00@cid24.00 [60.00-1000.00]

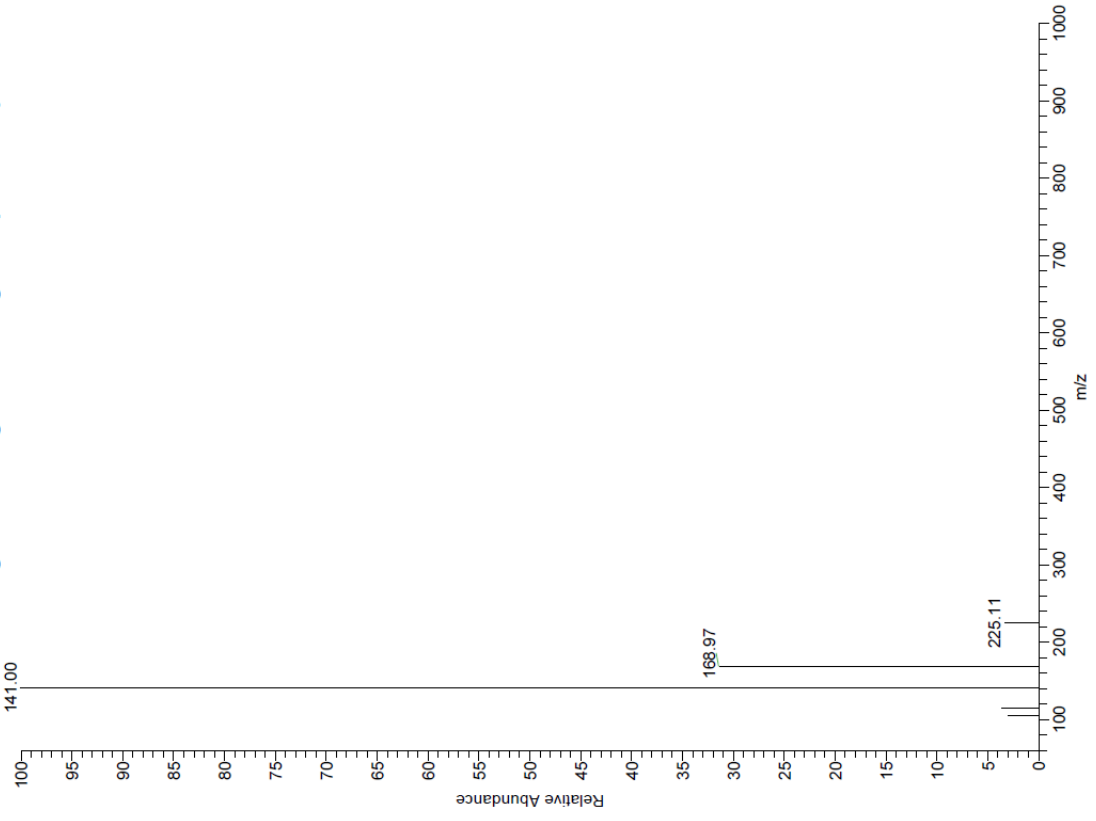

λ1305B\_Na\_MS2 #1\_RT: 0.00\_AV: 1\_NL: 1.44E2  
F: ITMS + c ESI Full ms3 423.00@cid33.00 363.00@cid30.00 [95.00-1000.00]

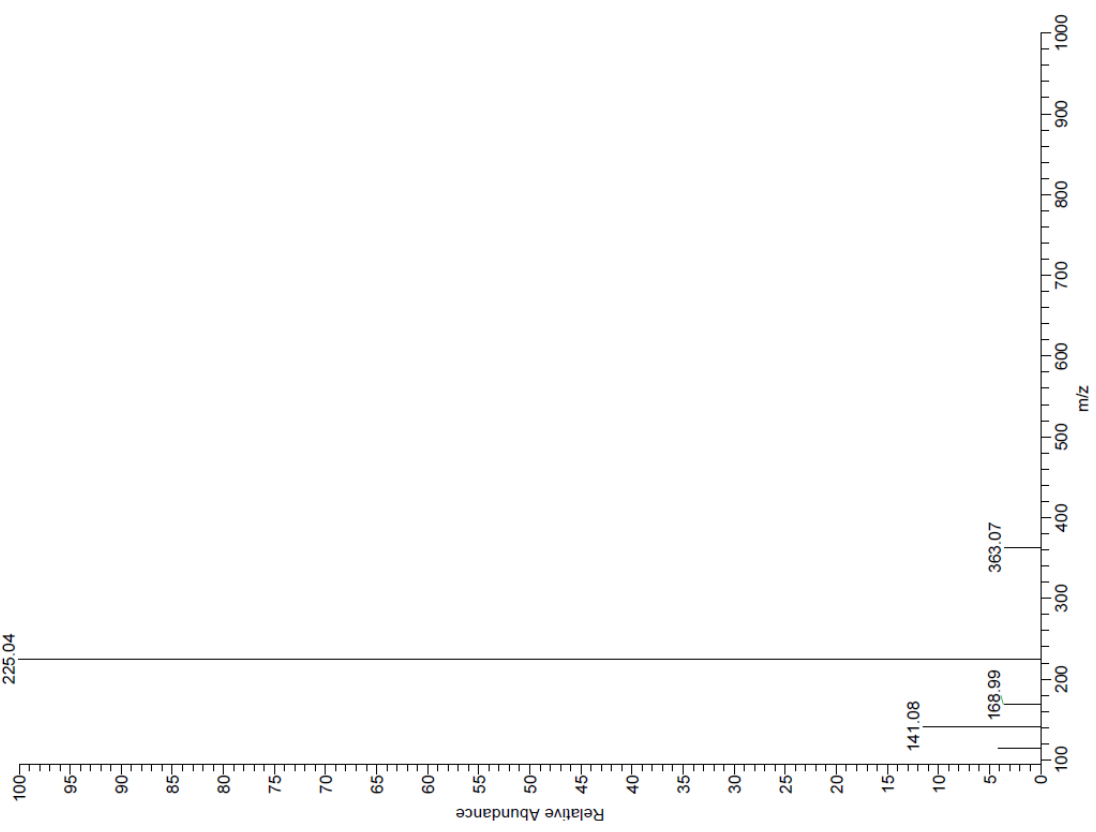

## ESPECTRO ESI-FIA-TOF-Medida de Masas Exactas

### Analysis Info

Sample Name AT305B\_400\_1-A,12\_01\_13140.d  
Method fia\_pos\_medio\_350-1500\_egf.m

Acquisition Date 3/12/2014 1:44:48 PM  
Instrument micrOTOF

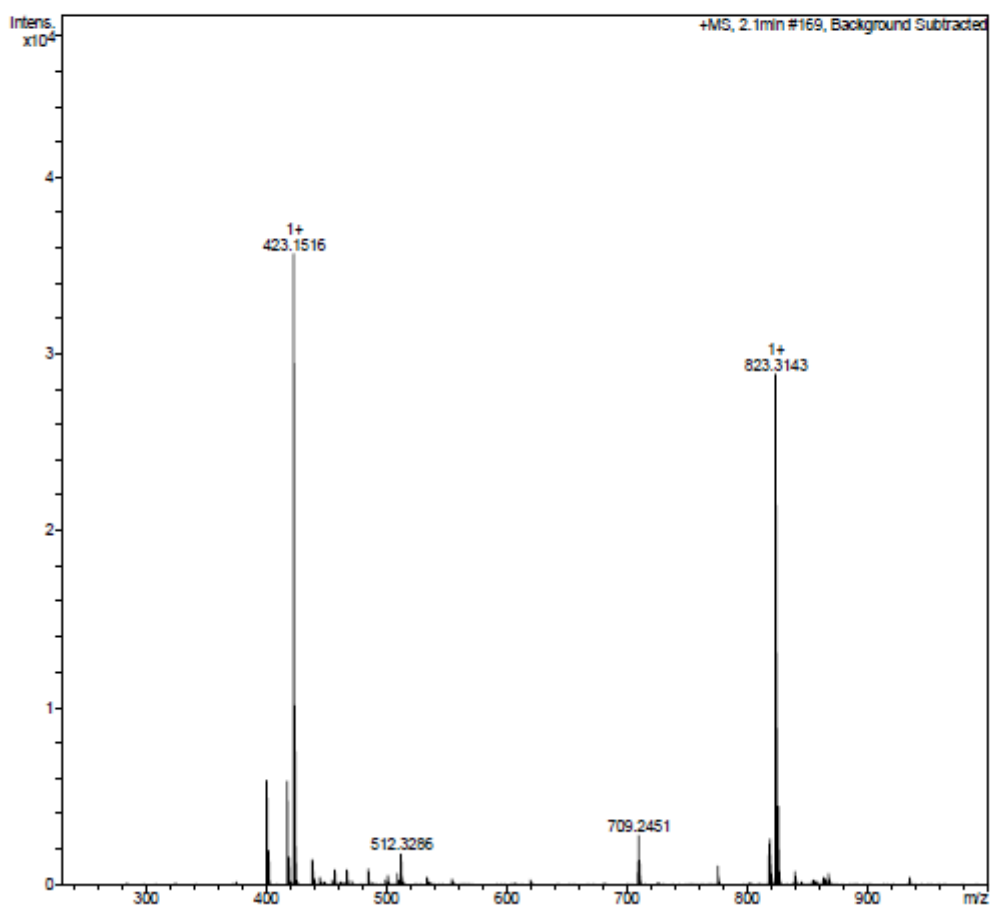

### (E)-methyl 2-(2-(5-(acetoxymethyl)furan-2-carbonyl)hydrazono)-2-phenylacetate 19

Isolated as a slightly yellow oil (28 mg, 34 % yield) as a single isomer.

<sup>1</sup>H NMR (400 MHz, DMSO) δ 10.45 (1H, bs), 7.55-7.44 (6H, m, Ph + furan ring), 6.75 (1H, bs, furan ring), 5.08 (2H, s, AcOCH<sub>2</sub>), 3.82 (3H, s, COOCH<sub>3</sub>), 2.06 (3H, s, Acetyl CH<sub>3</sub>). <sup>13</sup>C NMR (101 MHz, DMSO) δ 170.29 (C24), 164.42 (C13), 153.49 (C1), 145.81 (C4), 130.52 (C12), 129.73 (C19), 129.44 (C18+C20), 129.15 (C21+C17), 113.07 (C2), 57.77 (C5), 53.12 (C16), 20.96 (C25).

Elementar analysis for C<sub>17</sub>H<sub>16</sub>N<sub>2</sub>O<sub>6</sub> calc. %C 59.30; %H 4.68; %N 8.14 found %C 59.68; %H 5.10; %N 8.02.



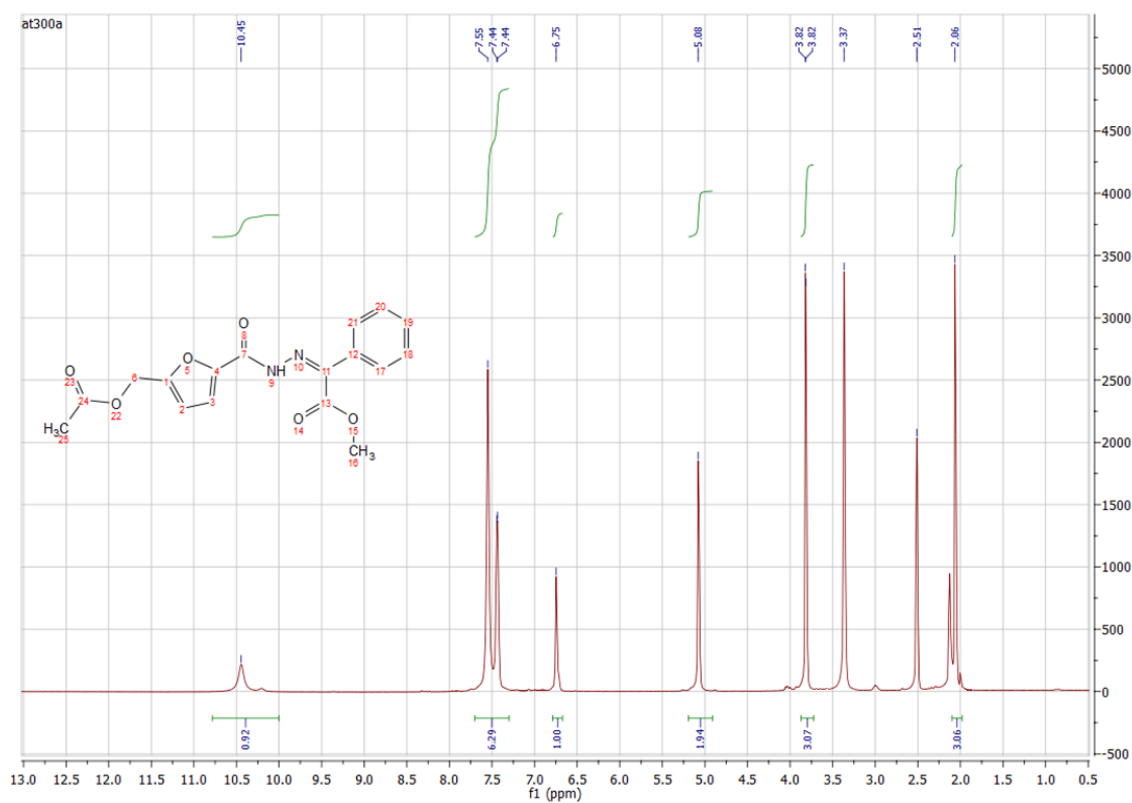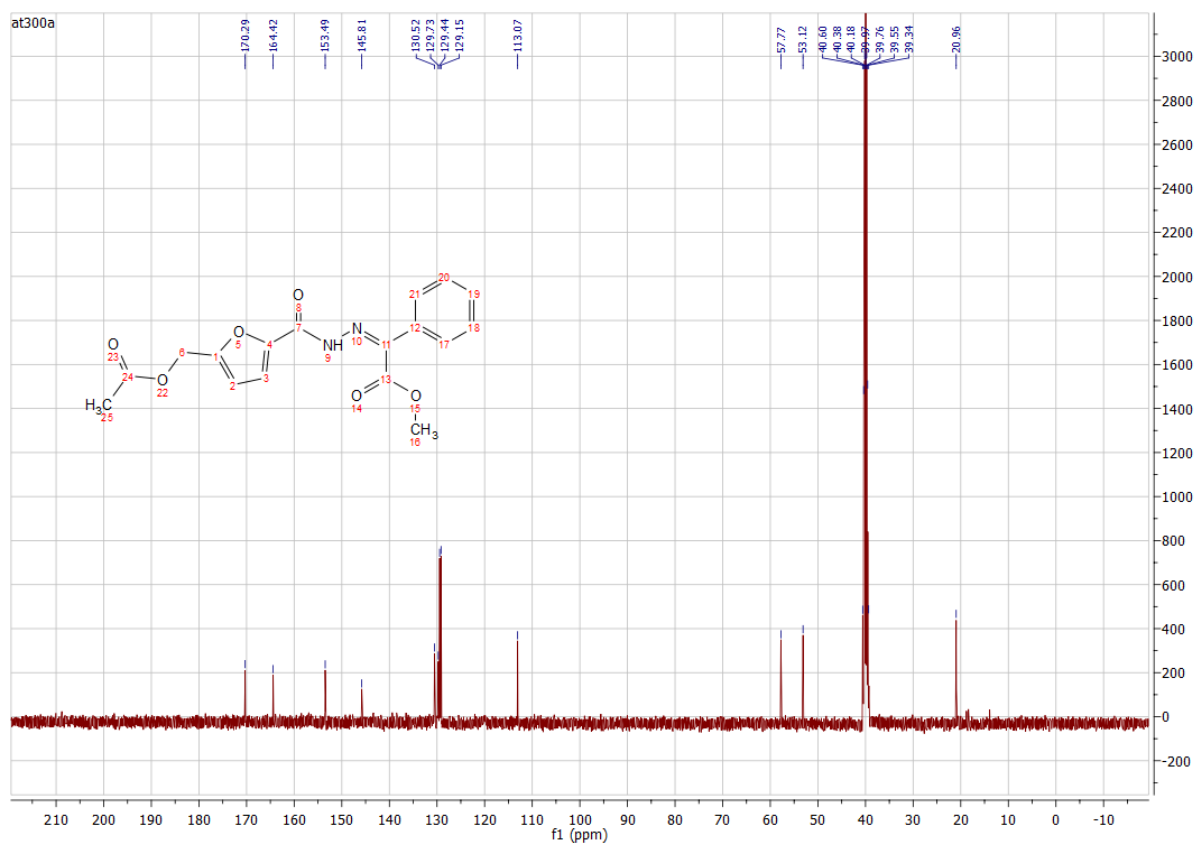

**(E)-methyl 2-(2-(5-((benzyloxy)methyl)furan-2-carbonyl)hydrazono)-2-phenylacetate**

Isolated as a slightly yellow oil (83 mg, 89 % yield) as a single isomer.

<sup>1</sup>H NMR (400 MHz, DMSO) δ 10.35 (1H, bs, N-H), 7.56-7.30 (11H, m, Phenyl groups + H ortho to carbonyl in furan), 6.70-6.69 (1H, d, H meta to carbonyl in furan), 4.50 (4H, bs, CH<sub>2</sub>OCH<sub>2</sub>), 3.82 (3H, s, COOCH<sub>3</sub>). <sup>13</sup>C NMR (101 MHz, DMSO) δ 164.40 (COOCH<sub>3</sub>), 155.95 (furan quaternary linked to

HOCH<sub>2</sub>), 145.55 (furan quaternary linked to carbonyl), 138.24 (Ph), 130.53 (Ph), 129.70 (Ph), 129.46 (Ph), 129.13 (Ph), 128.77 (Ph), 128.20 (Ph), 128.11 (Ph), 112.16 (furan C meta to carbonyl), 72.12 (CH<sub>2</sub>OCH<sub>2</sub>Ph), 63.84 (CH<sub>2</sub>OCH<sub>2</sub>Ph), 53.10 (COOCH<sub>3</sub>).

Elementar analysis for C<sub>22</sub>H<sub>20</sub>N<sub>2</sub>O<sub>5</sub> calc. %C 67.34; %H 5.14; %N 7.14 found %C 67.32; %H 5.17; %N 7.15.

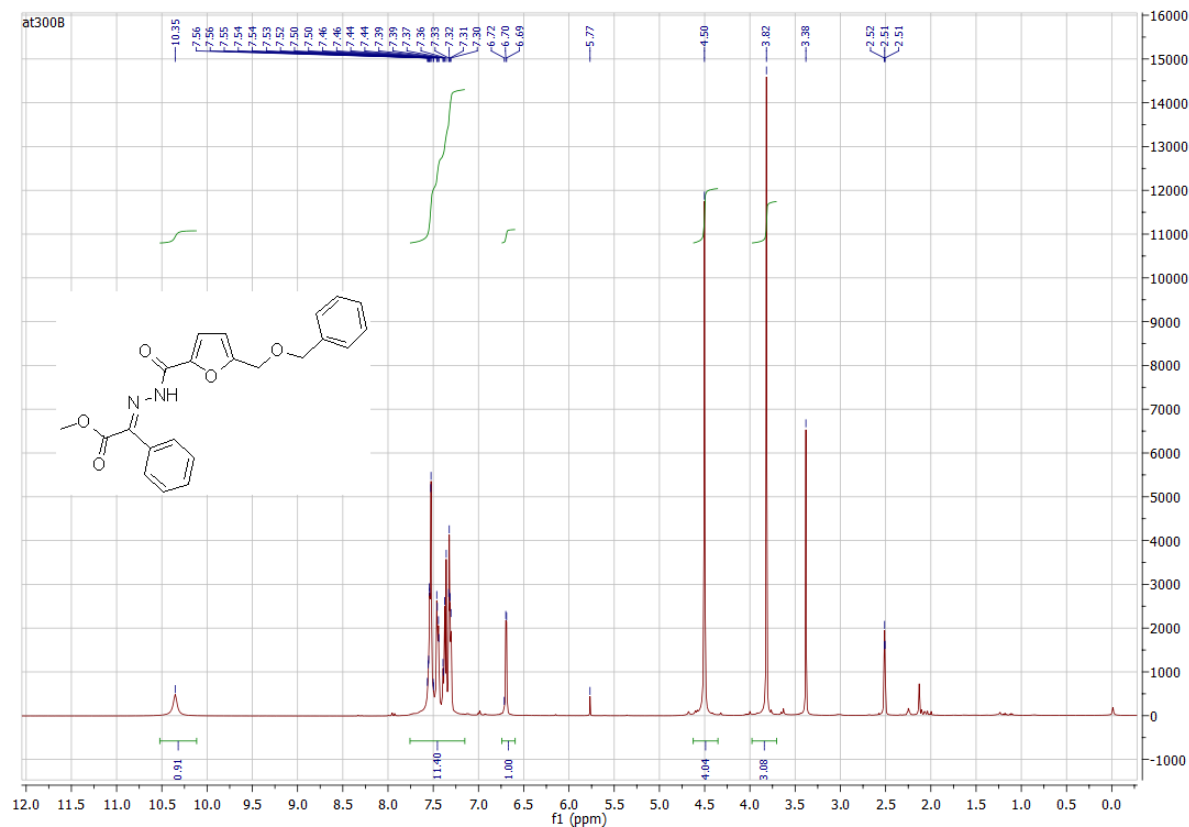

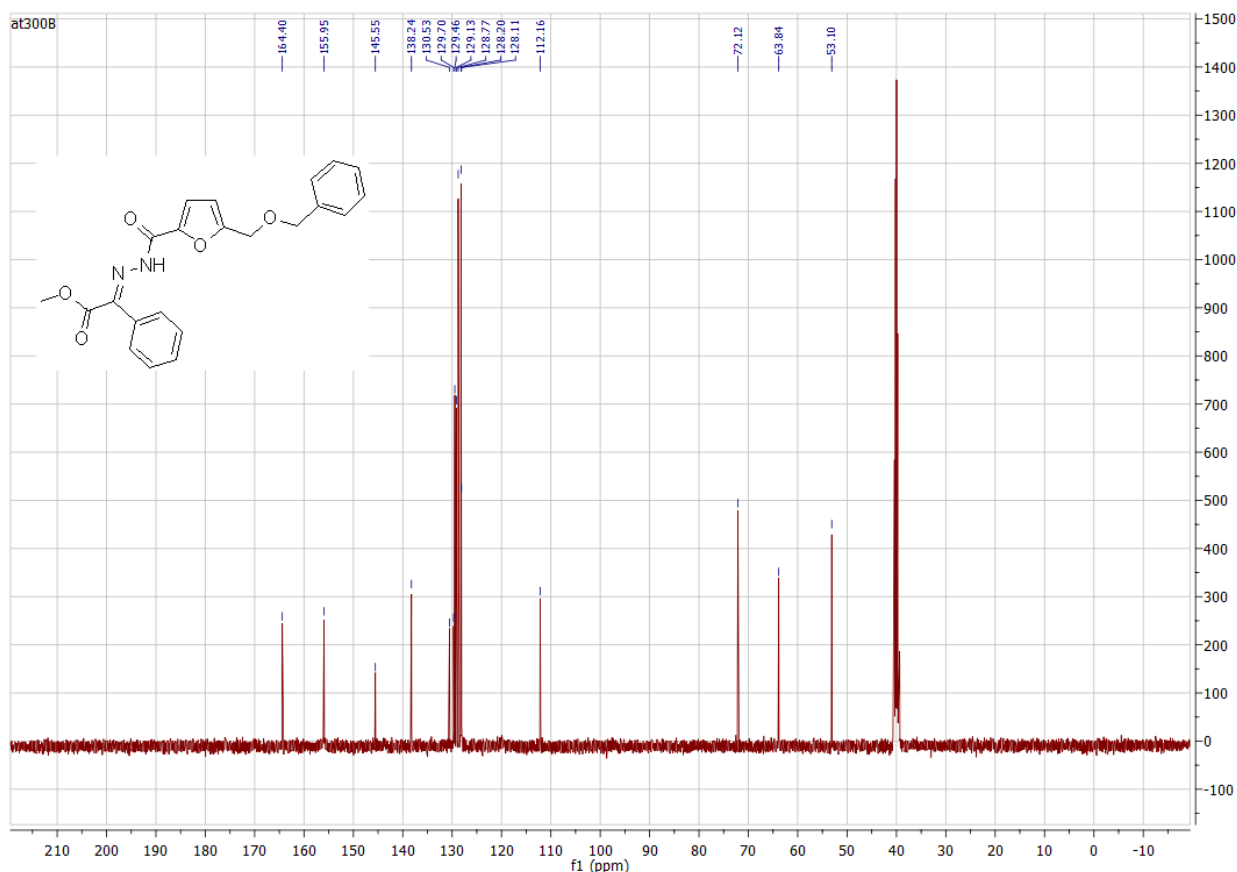

**(*E*)-methyl 2-(2-(5-(((tert-butyldimethylsilyl)oxy)methyl) furan-2-carbonyl)hydrazono)-2-(phenyl) acetate 21**

Isolated as a slightly yellow oil (98 mg, >99 % yield) as a single isomer.

$^1\text{H}$  NMR (400 MHz, DMSO)  $\delta$  10.21 (1H, s, N-H), 7.55- 7.44 (6H, m, phenyl aromatics + H ortho to carbonyl in furan), 6.59 (1H, bs, H meta to carbonyl in furan), 4.63 (2H, s,  $\text{OCH}_2$ ), 3.81 (3H, s,  $\text{COOCH}_3$ ), 0.85 (9H, s, t-butyl TBDMS), 0.02 (6H, s, methyl TBDMS).  $^{13}\text{C}$  NMR (101 MHz, DMSO)  $\delta$  163.90 ( $\text{COOCH}_3$ ), 157.70 (furan quaternary linked to  $\text{HOCH}_2$ ), 144.66 (furan quaternary linked to carbonyl), 130.11 (Ph), 129.16 (Ph), 129.05 (Ph), 128.59 (Ph), 110.13 (furan C meta to carbonyl), 57.37 ( $\text{TBDMSOCH}_2$ ), 52.61 ( $\text{COOCH}_3$ ), 25.67 (methyl carbon TBDMS), 17.91 (t-butyl carbons), -5.36 (Quaternary from TBDMS).

Elementar analysis for  $\text{C}_{21}\text{H}_{28}\text{N}_2\text{O}_5\text{Si}$  calc. %C 60.55; %H 6.78; %N 6.73 found %C 60.42; %H 6.56; %N 6.70.

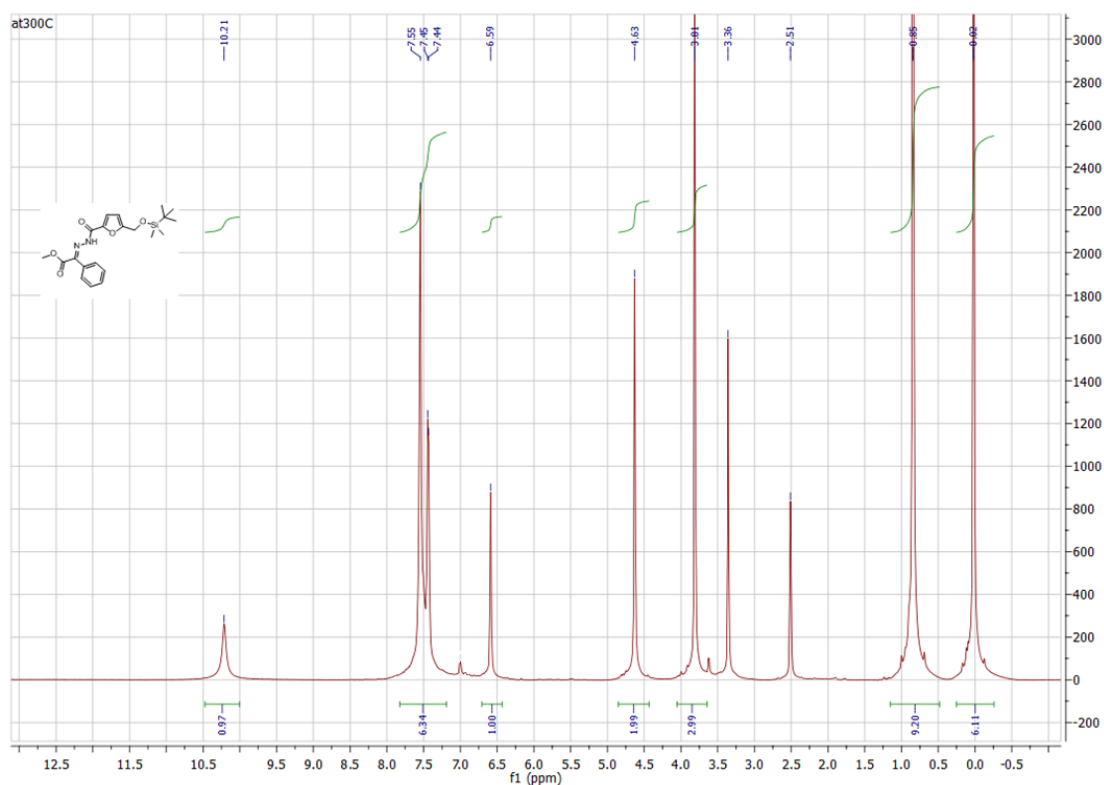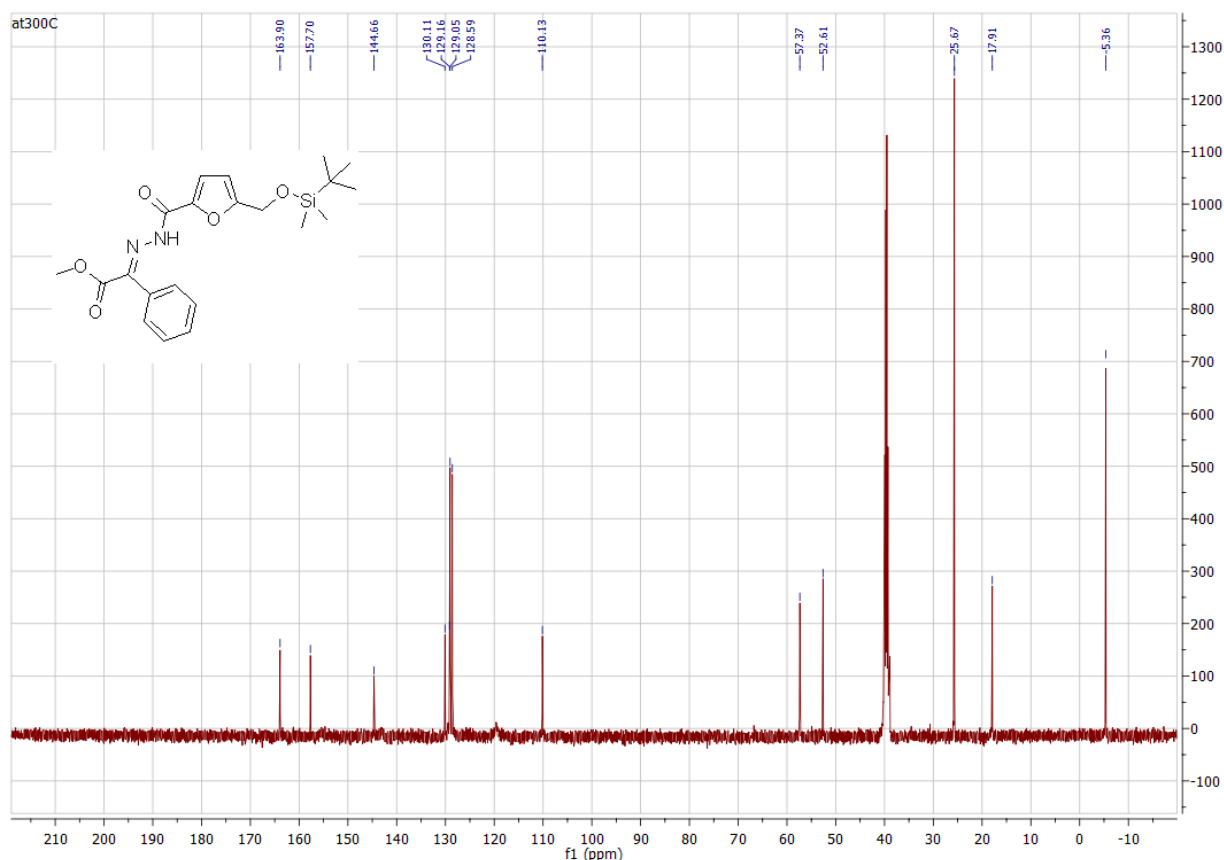

**(E)-methyl 2-(2-(5-(((tert-butyl)dimethylsilyloxy)methyl)furan-2-carbonyl)hydrazono)-2-(4-nitrophenyl)acetate**

Isolated as a yellow powder (30 mg, 27 % yield) as a single isomer.

$^1\text{H}$  NMR (400 MHz, DMSO)  $\delta$  10.85 (1H, bs, N-H), 8.36-8.34 (2H, d, H18+H20), 7.75-7.62 (3H, m, H17+H21+H3), 6.61-6.60 (1H, d, H2), 4.68 (2H, s, H6), 3.35 (3H, s, H16), 0.86 (9H, s, t-butyl TBDMS), 0.05 (6H, s, methyl TBDMS).  $^{13}\text{C}$  NMR (101 MHz, DMSO)  $\delta$  163.84 (COOCH<sub>3</sub>), 158.49 (furan quaternary linked to HOCH<sub>2</sub>), 148.67 (Ph quaternary nitro), 144.86 (furan quaternary linked to

carbonyl), 137.16 (Ph quaternary hydrazone), 131.30 (C18+C20), 124.36 (C17+C21), 110.38 (furan C meta to carbonyl), 57.94 (TBDMSOCH<sub>2</sub>), 53.22 (COOCH<sub>3</sub>), 26.14 (methyl carbon TBDMS), 18.38 (t-butyl carbons), -4.92 (Quaternary from TBDMS).

MS (ESI+, M+H)=461.8; MS (ESI+, 461.8)=330.0; MS (ESI+, 330.0)=242.0; MS (ESI+, 242.0)=214.0.

The fragmentation pattern suggests the sequential loss of functional groups from the molecule, however rearrangements may take place. HRMS (ESI-TOF, M+Na) calc. 484.1516 found 484.1516

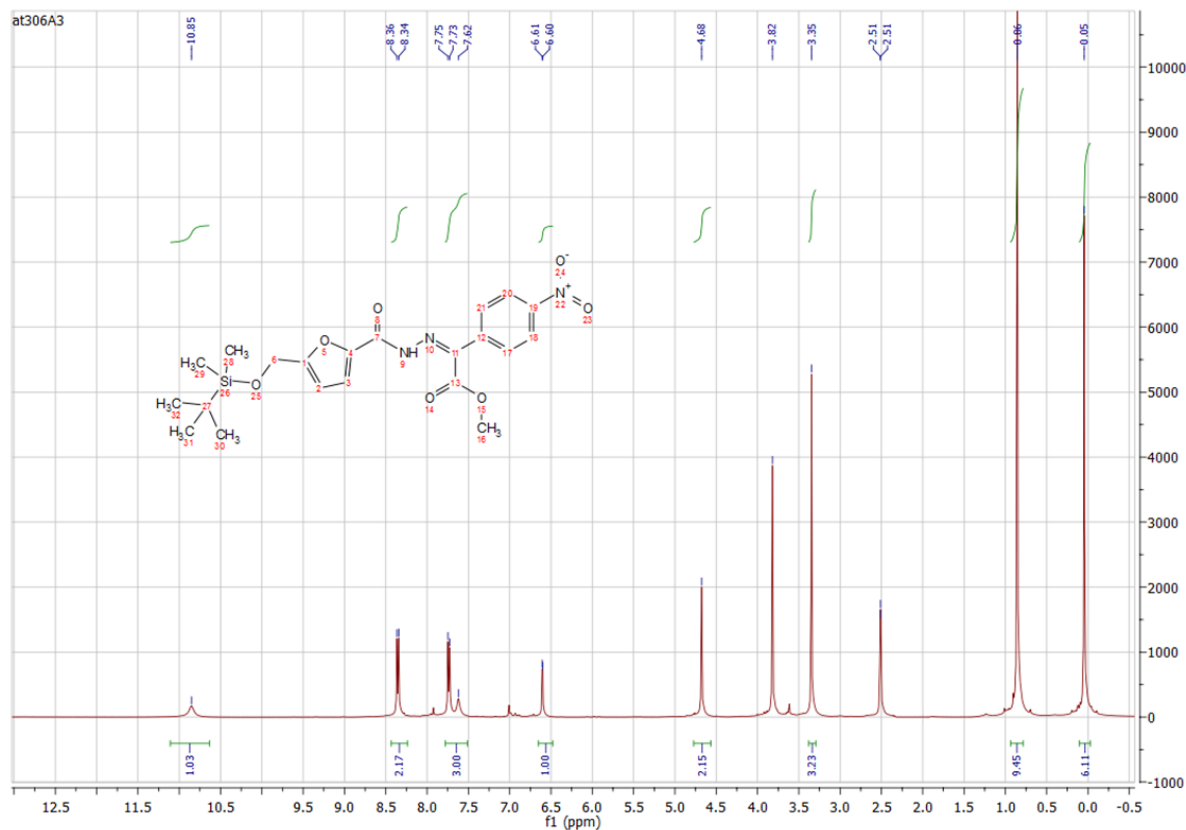

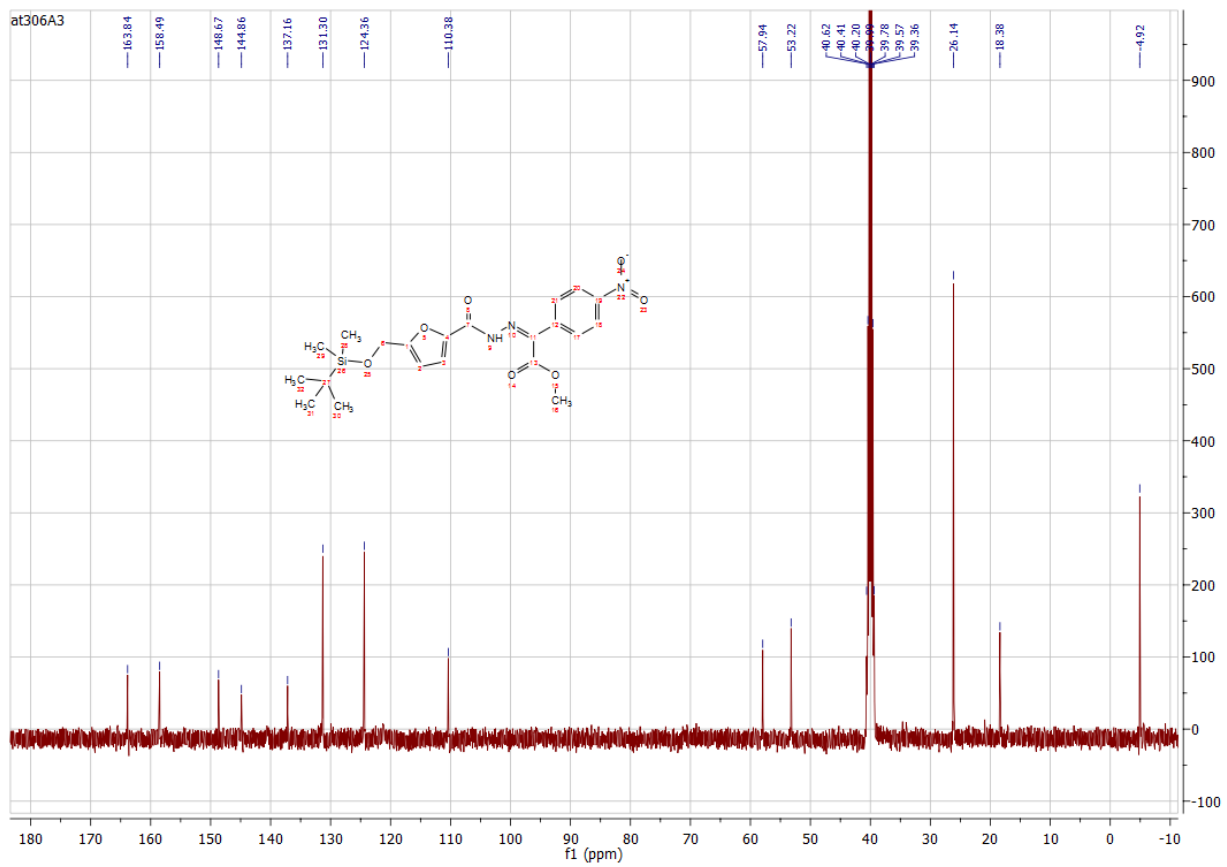

VT306A3 MS #1 RT: 0.00 AV: 1 NL: 1.54E4  
: ITMS + c ESI Full ms2 462.00@cid25.00 [125.00-700.00]

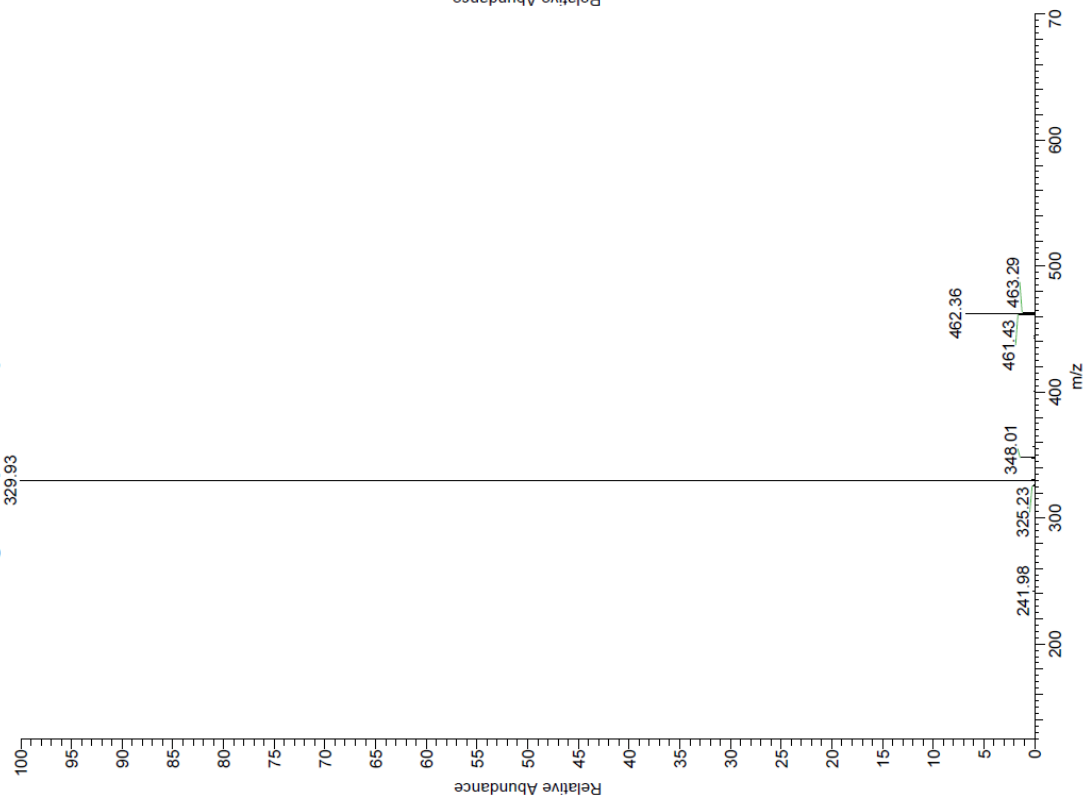

VT306A3 #1 RT: 0.00 AV: 1 NL: 6.57E4  
: ITMS + c ESI Full ms [55.00-700.00]

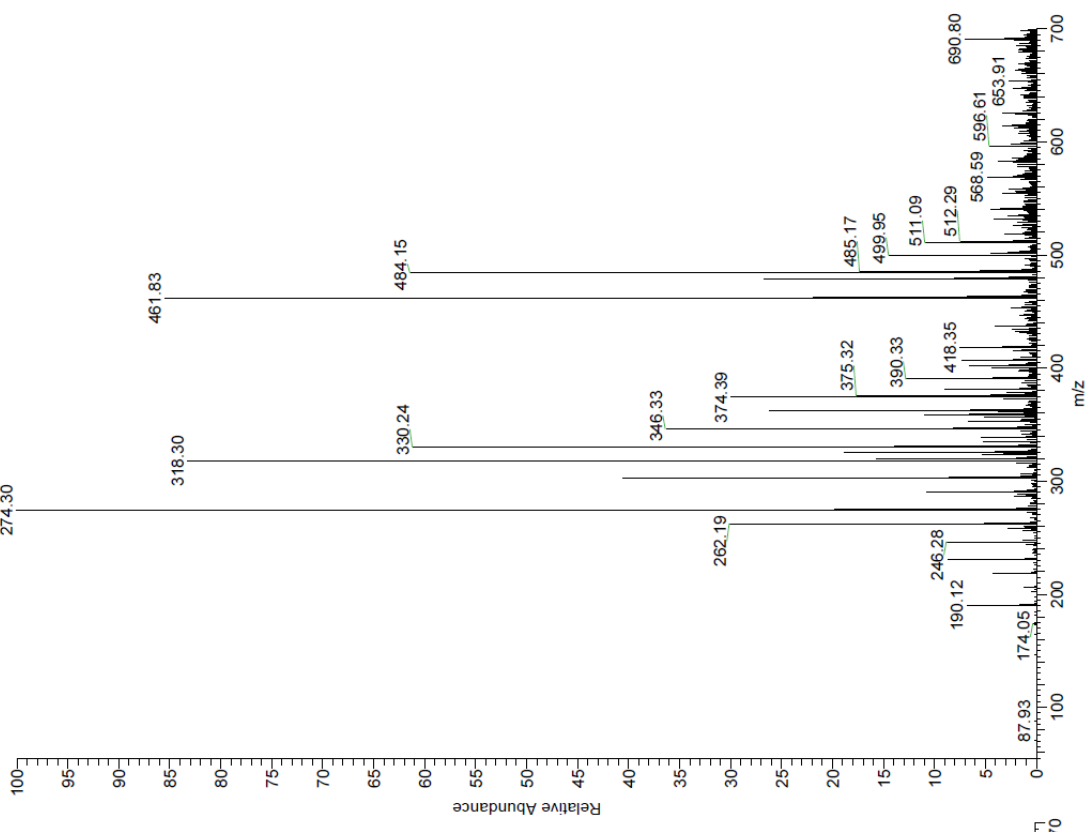

AT306A3\_MS3 #1 RT: 0.00 AV: 1 NL: 1.94E3  
T: ITMS + c ESI Full ms4 462.00@cid25.00@cid25.00 330.00 [65.00-700.00]

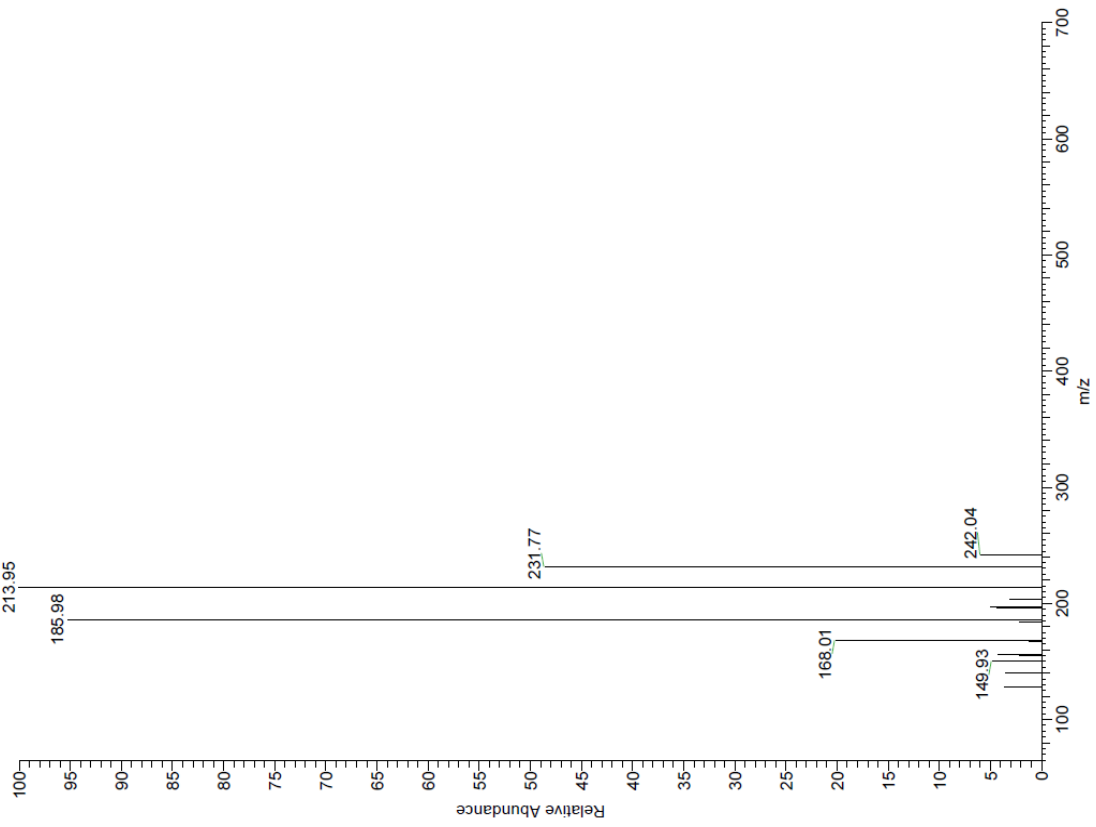

AT306A3\_MS2 #1 RT: 0.00 AV: 1 NL: 6.75E3  
F: ITMS + c ESI Full ms3 462.00@cid25.00 330.00 [90.00-700.00]

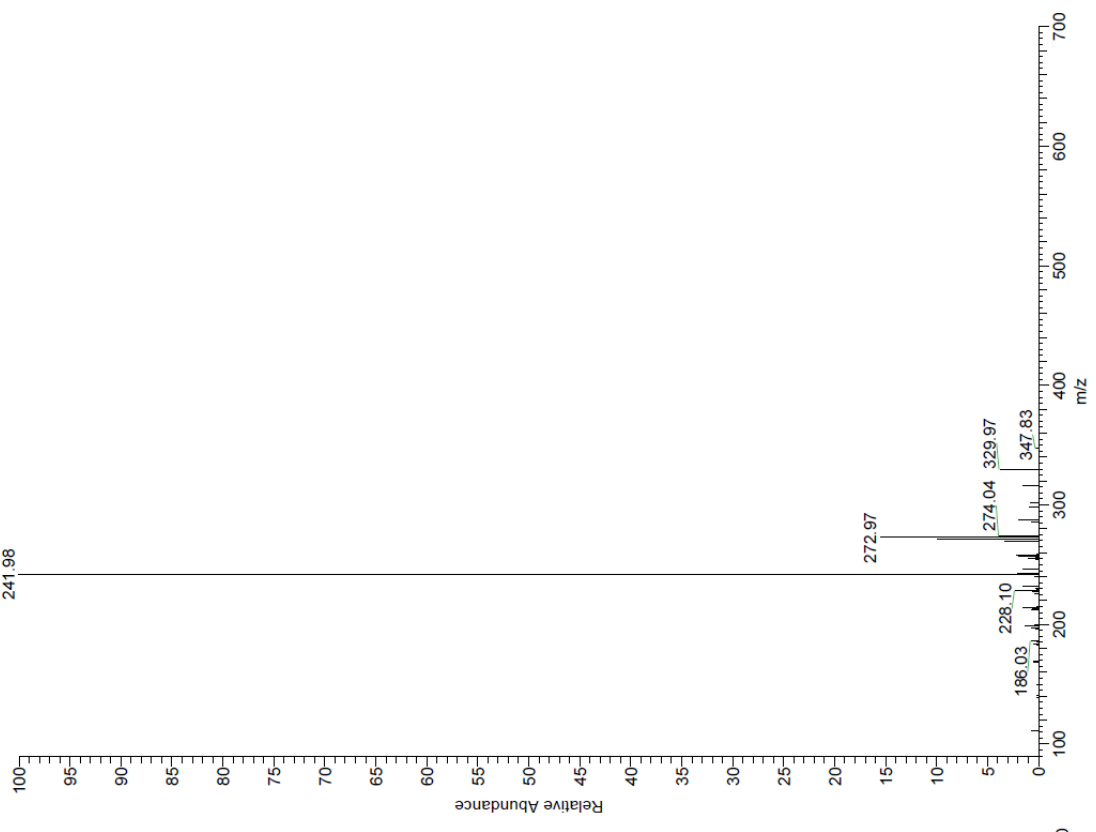



## ESPECTRO ESI-FIA-TOF-Medida de Masas Exactas

### Analysis Info

Sample Name AT306A3\_461\_1-C\_9\_01\_13192.d  
Method fia\_pos\_medio\_350-1500\_egf.m

Acquisition Date 3/18/2014 11:48:02 AM  
Instrument micrOTOF

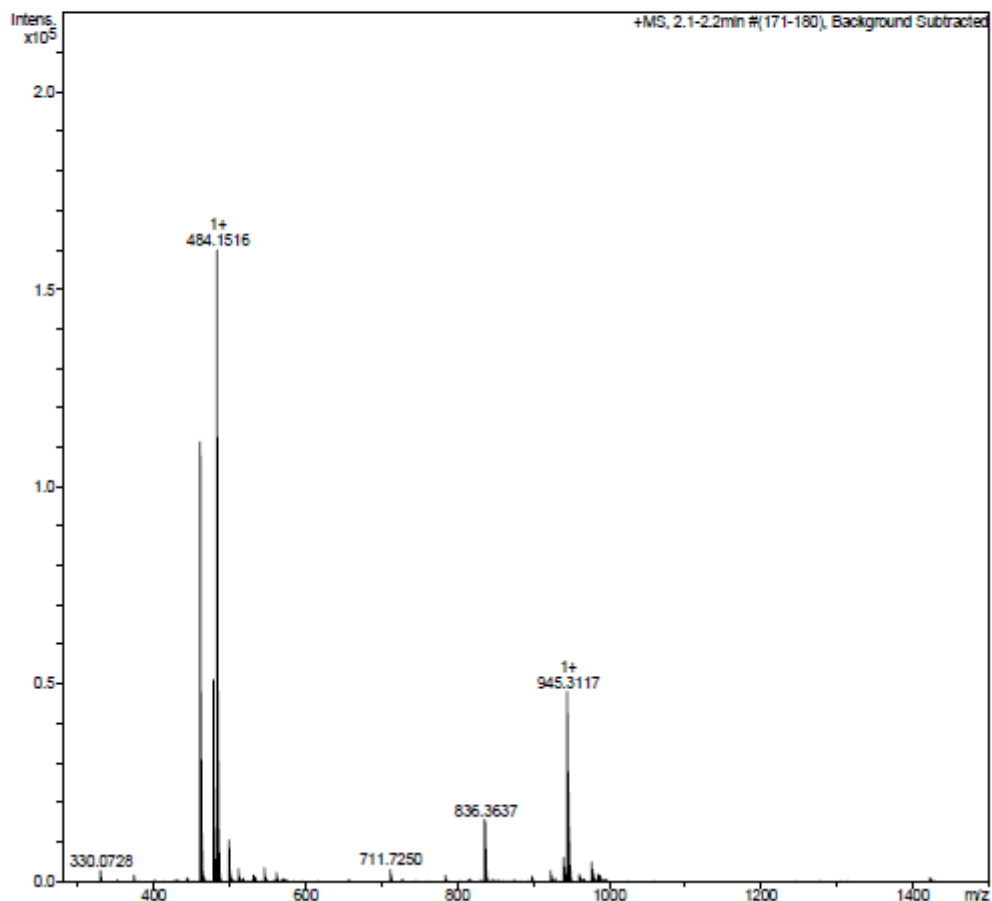

### (E)-ethyl 2-(2-(5-(((tert-butyldimethylsilyl)oxy)methyl)furan-2-carbonyl)hydrazono)-2-(pyridin-3-yl)acetate<sup>23</sup>

Isolated as a yellow oil (81 mg, 80 % yield) as a single isomer.

<sup>1</sup>H NMR (400 MHz, DMSO)  $\delta$  11.01 (1H, bs, N-H), 8.68-8.58 (2H, m, H22+H18), 7.84 (1H, d, H20), 7.67 (1H, bs, H3), 7.53 (1H, d, H19), 6.60 (1H, d, H2), 4.69 (2H, s, H6), 4.29-4.25 (2H, quartet, H16), 1.32-1.29 (3H, t, H17), 0.87 (9H, s, t-butyl TBDMS), 0.07 (6H, s, methyl TBDMS). <sup>13</sup>C NMR (101 MHz, DMSO)  $\delta$  163.81 (COOCH<sub>3</sub>), 158.42 (furan quaternary linked to HOCH<sub>2</sub>), 150.87 (C20), 149.72 (C22), 144.97 (C4), 137.38 (C18), 126.77 (C12), 124.20 (C19), 110.24 (furan C meta to carbonyl), 62.01 (TBDMSOCH<sub>2</sub>), 57.98 (CH<sub>2</sub>CH<sub>3</sub>), 26.18 (methyl carbon TBDMS), 18.42 (t-butyl carbons), 14.50 (CH<sub>2</sub>CH<sub>3</sub>), -4.87 (Quaternary from TBDMS).

Elementar analysis for C<sub>21</sub>H<sub>29</sub>N<sub>3</sub>O<sub>5</sub>Si calc. %C 58.45; %H 6.77; %N 9.74 found %C 58.55; %H 6.73; %N 9.53.

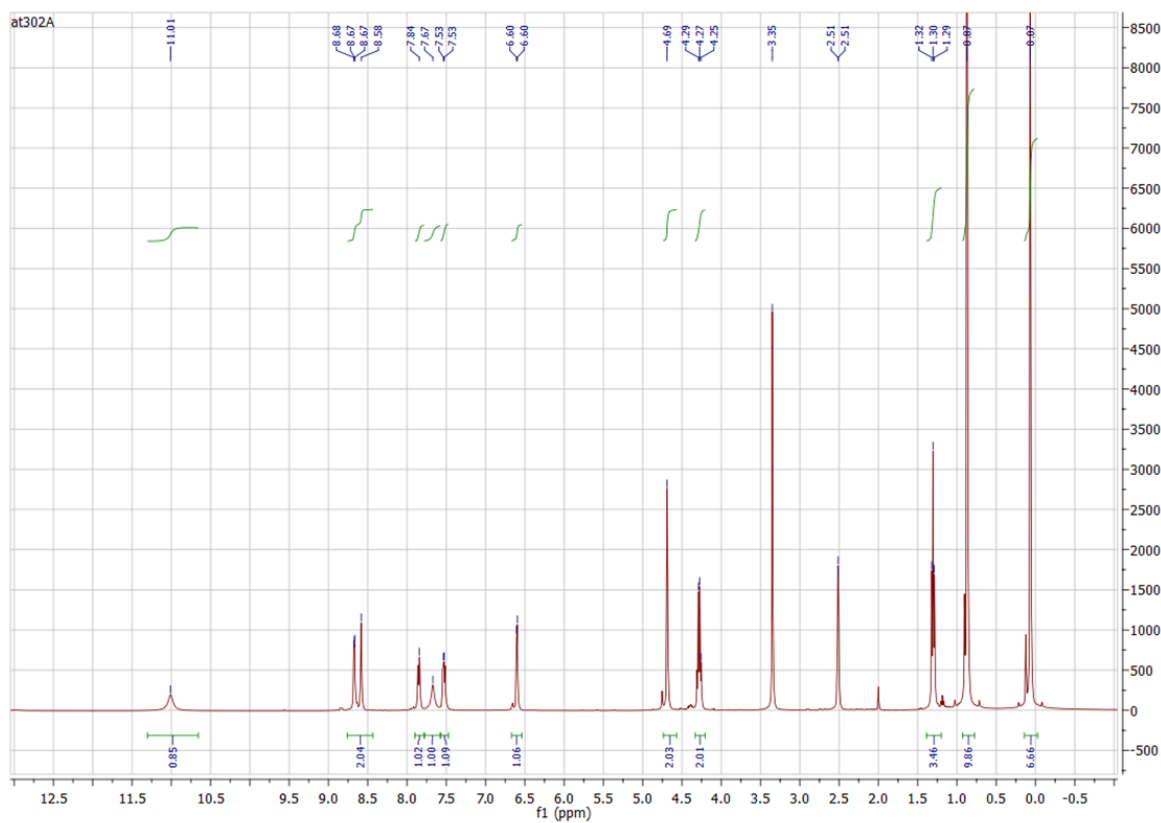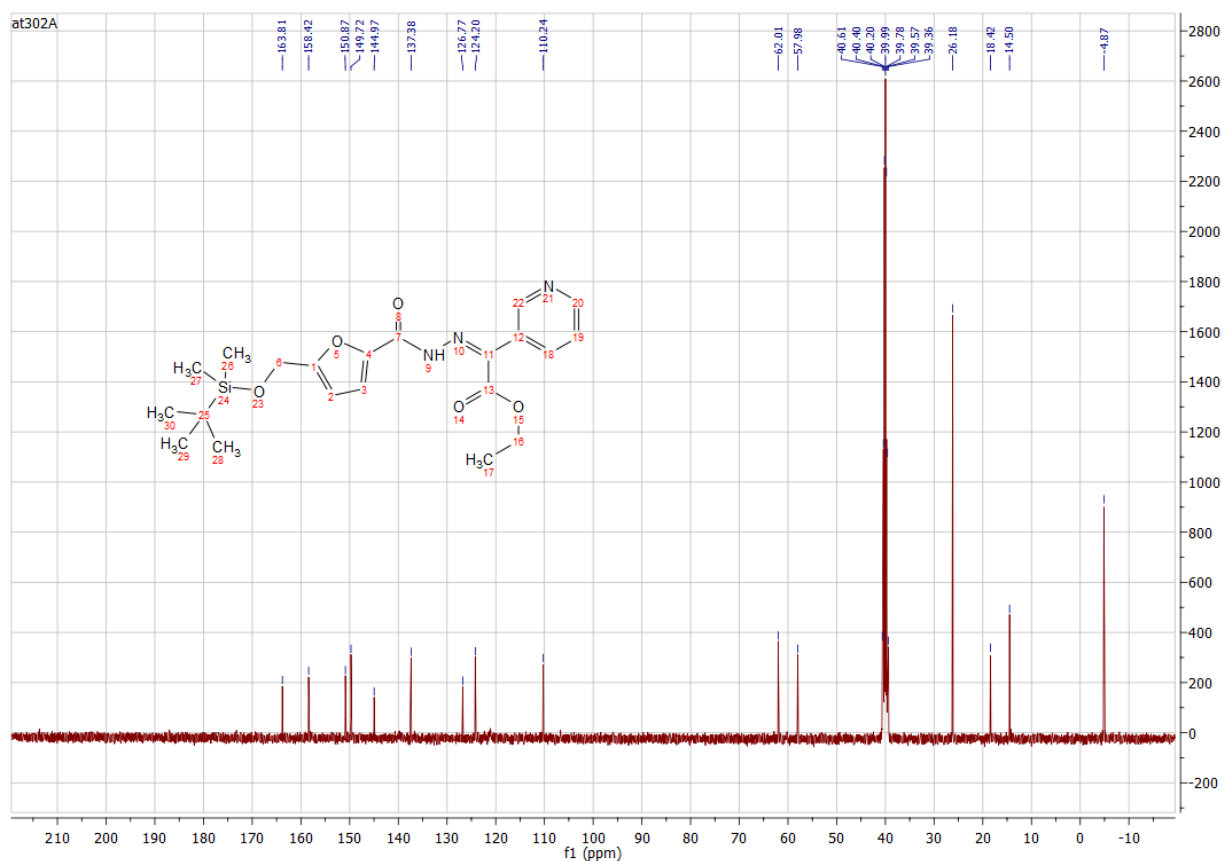

**(E)-ethyl 2-(2-(5-(((tert-butyl)dimethylsilyloxy)methyl) furan-2-carbonyl)hydrazono)-2-phenylacetate**

Isolated as a slightly yellow oil (74 mg, 73 % yield) as a single isomer.

$^1\text{H}$  NMR (400 MHz,  $\text{CDCl}_3$ )  $\delta$  7.57-7.37 (6H, m, Ph + furan H near to carbonyl), 6.44 (1H, bs, furan H  $\beta$  to carbonyl), 4.67 (2H, bm,  $\text{OCH}_2$ ), 4.42-4.37 (2H, quartet, H15), 1.43-1.39 (3H, t, H16), 0.90 (9H, s, t-

butyl TBDMS), 0.06 (6H, s, methyl TBDMS). <sup>13</sup>C NMR (75 MHz, CDCl<sub>3</sub>) δ 163.67 (COOCH<sub>3</sub>), 130.63 (Ph), 129.63 (Ph), 128.31 (Ph), 109.61 (C2), 62.20 (C4), 58.41 (C15), 25.77 (methyl carbon TBDMS), 18.29 (t-butyl carbons), 14.20 (C16), -5.34 (Quaternary from TBDMS).

Elementar analysis for C<sub>22</sub>H<sub>30</sub>N<sub>2</sub>O<sub>5</sub>Si calc. %C 61.37; %H 7.02; %N 6.51 found %C 61.10; %H 6.96; %N 6.30.

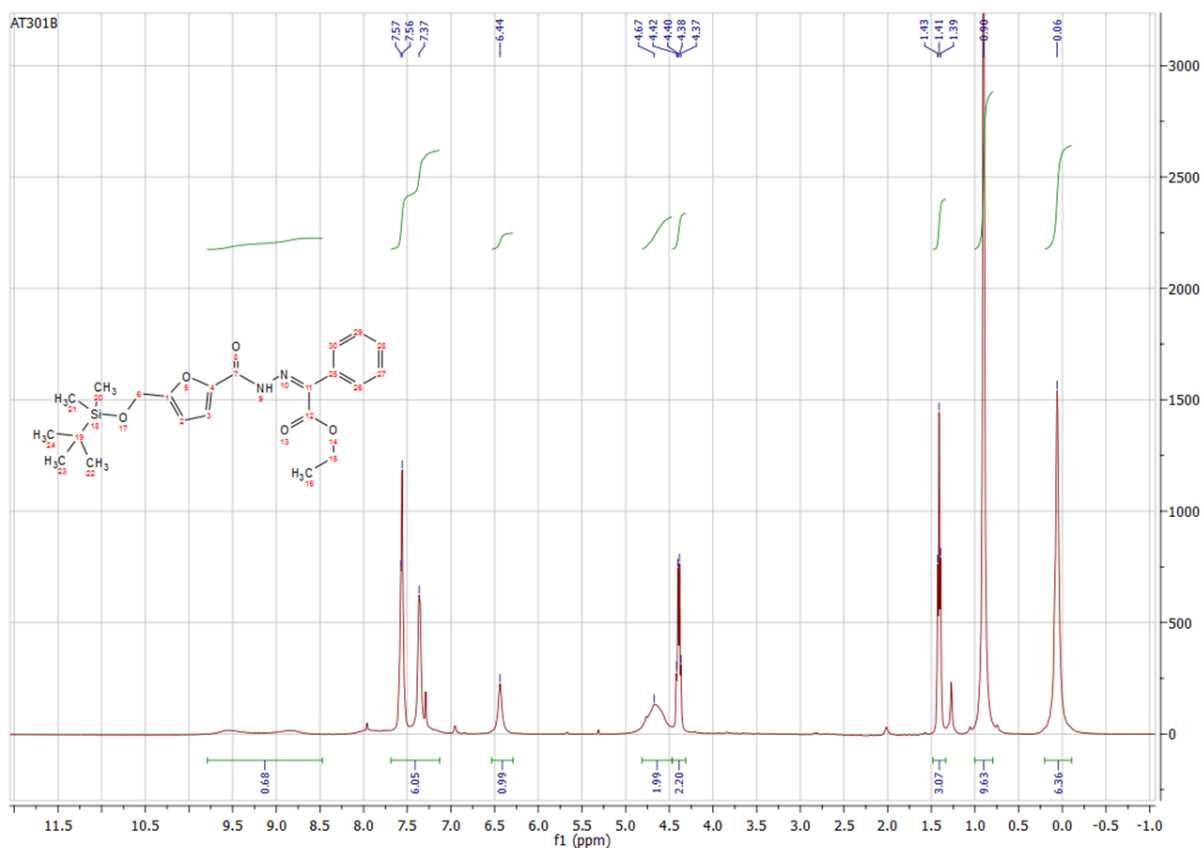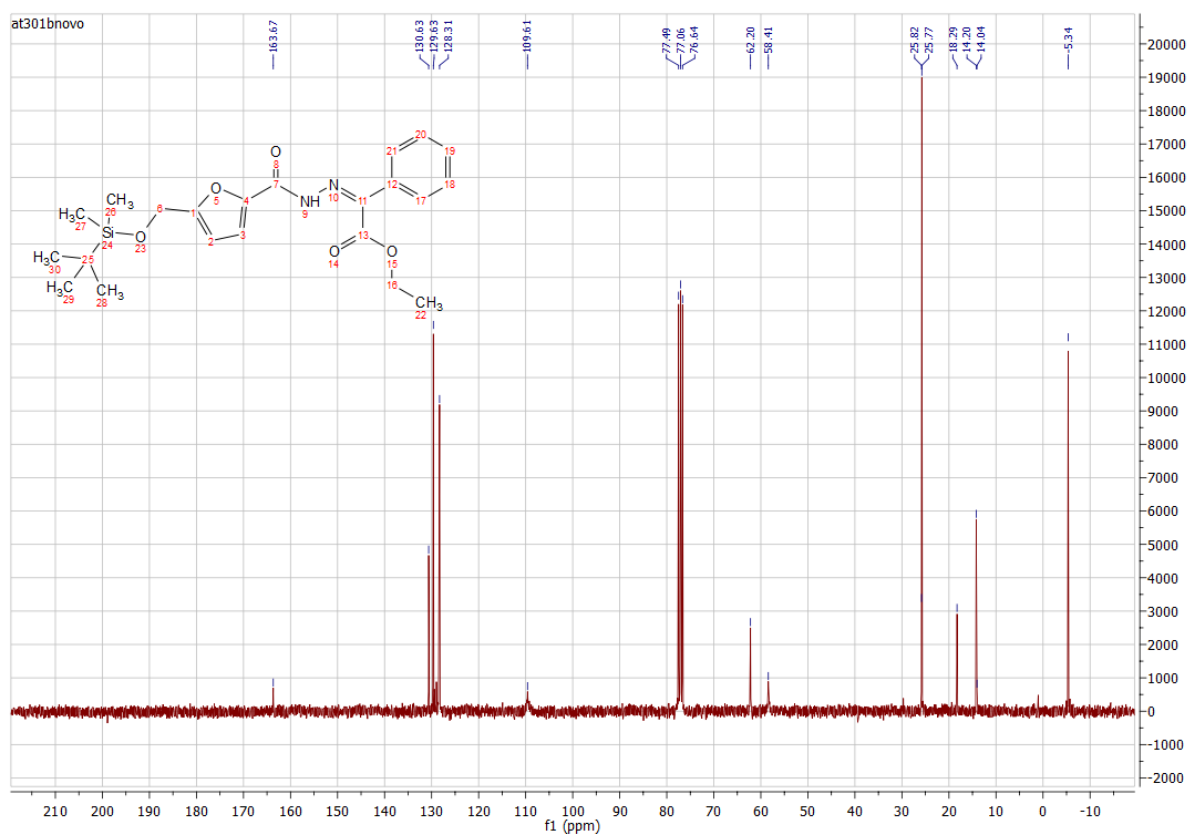

**(E)-isopropyl 2-(2-(5-((tert-butyldimethylsilyloxy)methyl)furan-2-carbonyl)hydrazono)-2-phenylacetate**

Isolated as a slightly yellow oil (77 mg, 73 % yield) as a single isomer.

$^1\text{H}$  NMR (400 MHz, DMSO)  $\delta$  10.26 (1H, bs, N-H), 7.56-7.41 (6H, m, Ph + furan H near to carbonyl), 6.60-6.59 (1H, d, furan H near to hydroxymethylene), 5.11-5.05 (1H, m,  $\text{CH}(\text{CH}_3)_2$ ), 4.64 (2H, s,  $\text{OCH}_2$ ), 1.31-1.29 (6H, d,  $\text{CH}(\text{CH}_3)_2$ ), 0.85 (9H, s, t-butyl TBDMS), 0.03 (6H, s, methyl TBDMS).  $^{13}\text{C}$  NMR (101 MHz, DMSO)  $\delta$  163.44 ( $\text{COOCH}_3$ ), 158.18 (quater. C furan at hydroxymethyl), 145.12 (quater. C furan at carbonyl), 130.49 (Ph), 129.66 (Ph), 129.44 (Ph), 129.08 (Ph), 110.45 (furan C near to hydroxymethyl), 69.64 ( $\text{OCH}_2$ ), 57.87 ( $\text{CH}(\text{CH}_3)_2$ ), 26.15 (methyl carbon TBDMS), 22.02 ( $\text{CH}(\text{CH}_3)_2$ ), 18.38 (t-butyl carbons), -4.89 (Quaternary from TBDMS).

Elementar analysis for  $\text{C}_{23}\text{H}_{32}\text{N}_2\text{O}_5\text{Si}$  calc. %C 62.13; %H 7.25; %N 6.30 found %C 62.51; %H 7.19; %N 6.43.

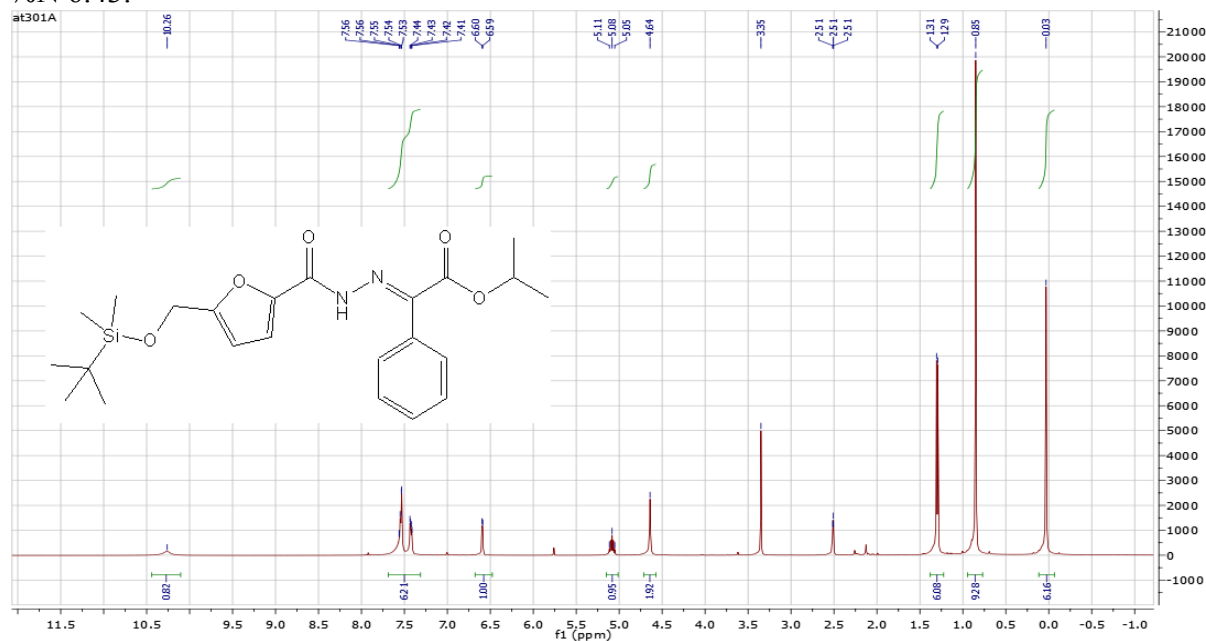

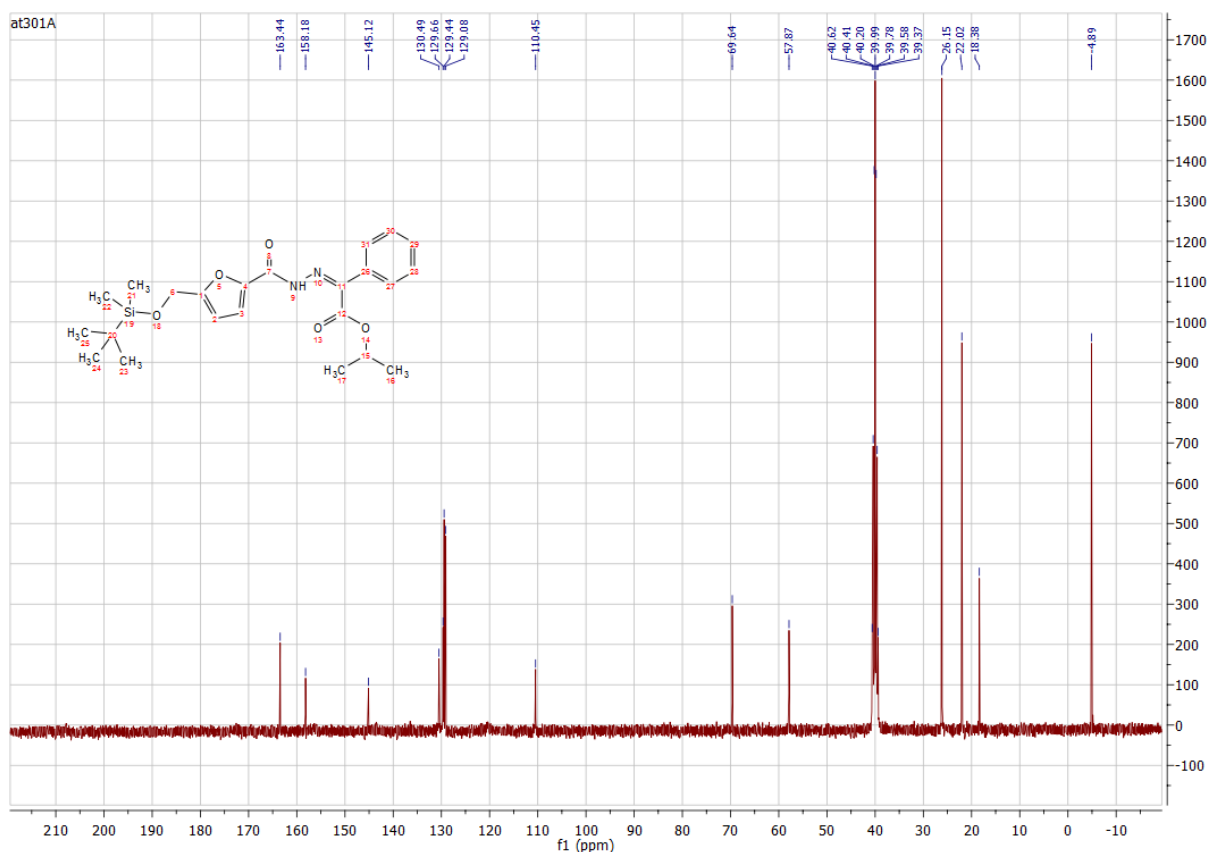

**(E)-ethyl 2-(2-(5-(((tert-butyl)dimethylsilyl)oxy)methyl)furan-2-carbonyl)hydrazono)-2-(p-tolyl)acetate 26**

Isolated as a slightly yellow oil (81 mg, 77 % yield) as a single isomer.

<sup>1</sup>H NMR (400 MHz, DMSO)  $\delta$  10.15 (1H, s, N-H), 7.35 (5H, m, Ph + furan H near to carbonyl), 6.60-6.59 (1H, d, furan H near to hydroxymethylene), 4.63 (2H, s, OCH<sub>2</sub>), 4.28 (2H, quartet, CH<sub>2</sub>CH<sub>3</sub>), 2.39 (3H, s, CH<sub>2</sub>CH<sub>3</sub>), 1.31-1.27 (3H, s, methyl at phenyl), 0.84 (9H, s, t-butyl TBDMS), 0.02 (6H, s, methyl TBDMS). <sup>13</sup>C NMR (101 MHz, DMSO)  $\delta$  163.99 (COOCH<sub>3</sub>), 158.08 (quater. C furan at hydroxymethyl), 145.21 (quater. C furan at carbonyl), 140.20 (Ph), 130.10 (Ph), 128.96 (Ph), 126.62 (Ph), 110.63 (furan C near to hydroxymethyl), 61.89 (OCH<sub>2</sub>), 57.80 (CH<sub>2</sub>CH<sub>3</sub>), 26.12 (methyl carbon TBDMS), 21.54 (methyl at phenyl), 18.36 (t-butyl carbons), 14.52 (CH<sub>2</sub>CH<sub>3</sub>), -4.96 (Quaternary from TBDMS).

Elementar analysis for C<sub>23</sub>H<sub>32</sub>N<sub>2</sub>O<sub>5</sub>Si calc. %C 62.13; %H 7.25; %N 6.30 found %C 62.35; %H 7.16; %N 6.42.

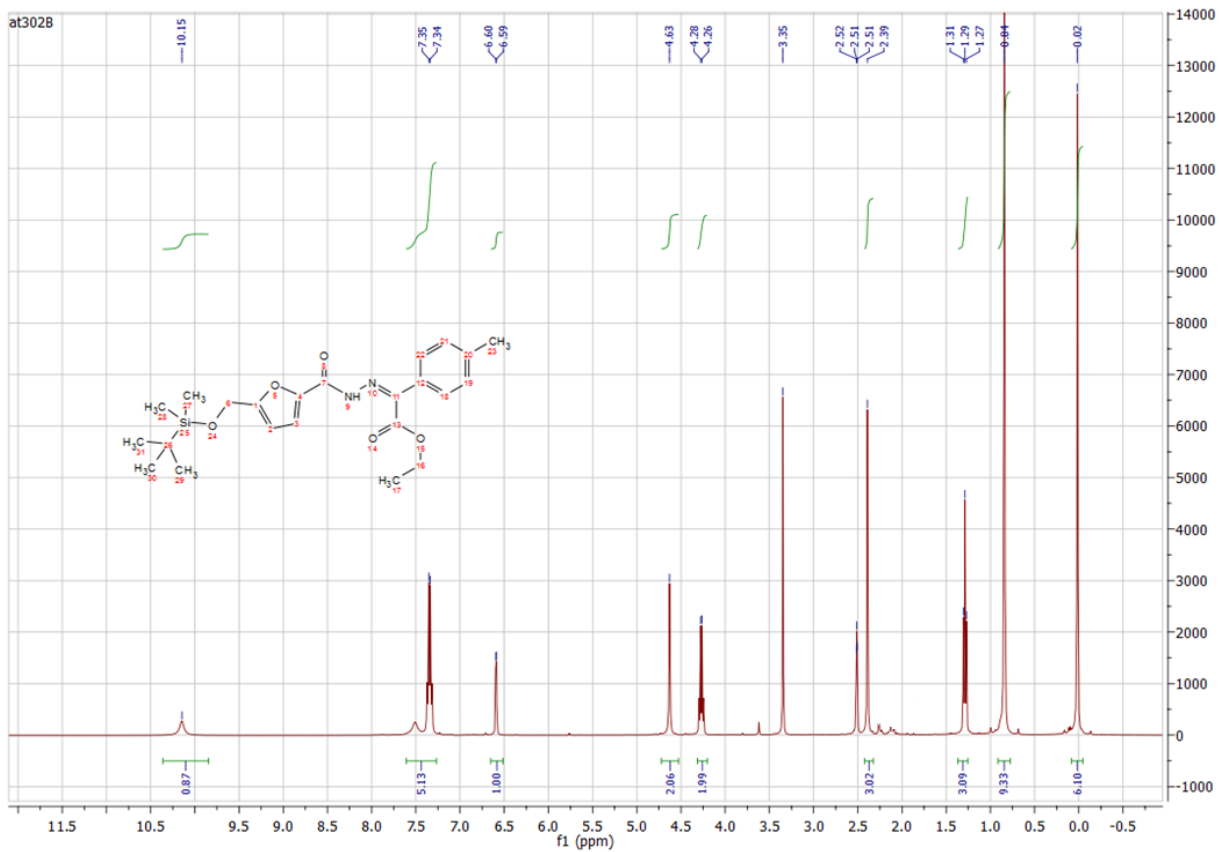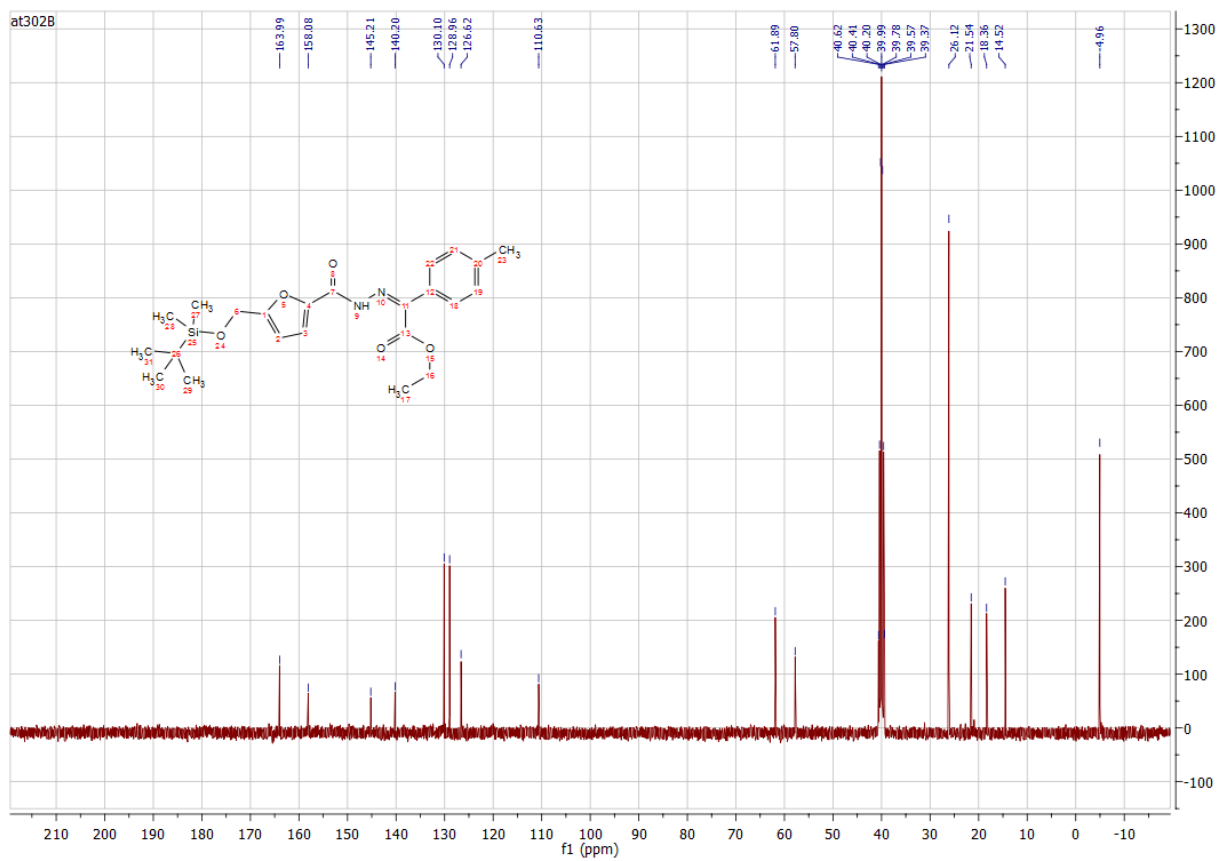

## Selectivity studies of reaction 1 table 2.

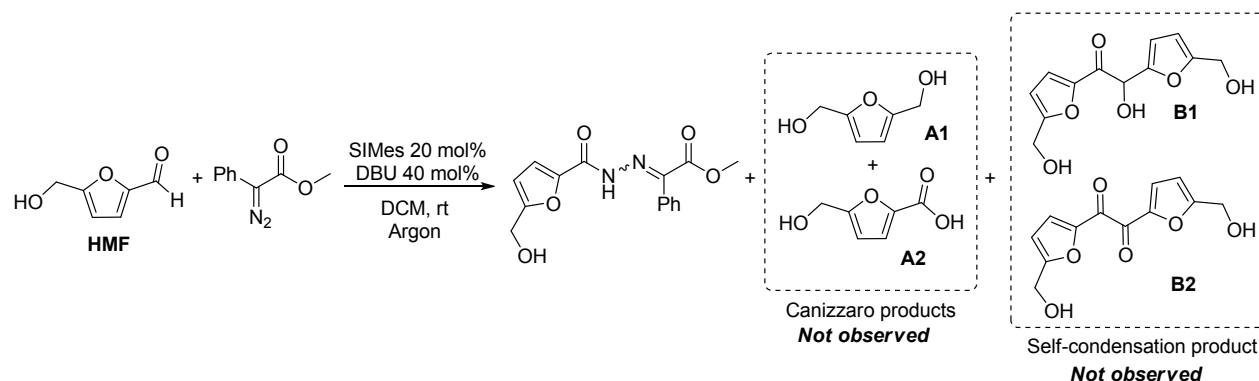

Products **A1**, **B1** and **B2** were not observed in the crude reaction mixture analysis by HPLC.

Canizzaro products **A1** and **A2** were prepared accordingly to Subbiah *et al.* [1]. HPLC result of acid **A2** is not shown.

Self-condensation products **B1** and **B2** were prepared using NHC catalysis as following: SIMes (10 mol %) and DBU (20 mol %) were dissolved in freshly dry DCM (0.5 mL) inside a round bottom flask under argon. The mixture was stirred for 15 minutes at room temperature. Then a solution of aldehyde (1 eq. in 0.5 mL of DCM) was added and the mixture was left reacting during four hours. The final product precipitates from the reaction medium. The reaction mixture is filtered off via canola and the crude analyzed by HPLC and  $^1\text{H}$  NMR.

**B1** -  $^1\text{H}$  NMR (DMSO- $d_6$ , 300 MHz):  $\delta$  7.50 (d,  $J = 3.6$  Hz, 1H), 6.51 (d,  $J = 3.6$  Hz, 1H), 6.35 (d,  $J = 3.2$  Hz, 1H), 6.22 (d,  $J = 3.2$  Hz, 1H), 5.74 (s, 1H), 4.46 (s, 2H), 4.31 (s, 2H). [2]

**B2** -  $^1\text{H}$  NMR (DMSO- $d_6$ , 300 MHz):  $\delta$  7.57 (d,  $J = 3.7$  Hz, 1H), 6.65 (d,  $J = 3.7$  Hz, 1H), 4.54 (s, 2H).

HPLC analysis was performed in a VWR Hitachi machine with a diode array detector L-2455 coupled to a pump L-2130 and using a KROMASIL 100 SIL 5.0 column, eluent: 99:1 to 80:20 (n-hexane/2-propanol) in 10 min then 80:20 (n-hexane/2-propanol) for the period showed in the chromatograms.

[1] Sowmiah Subbiah, Svilen P. Simeonov, José M. S. S. Esperança, Luís Paulo N. Rebelo, Carlos A. M. Afonso, *Green Chem.*, **2013**, 15, 2849-2853.

[2] NMR analysis is according to literature: Dajiang (D. J.) Liu and Eugene Y.-X. Chen, *ACS Catal.*, **2014**, 4, 1302–1310.

HPLC of reaction mixture (reaction conditions accordingly to Table 1, entry 1)

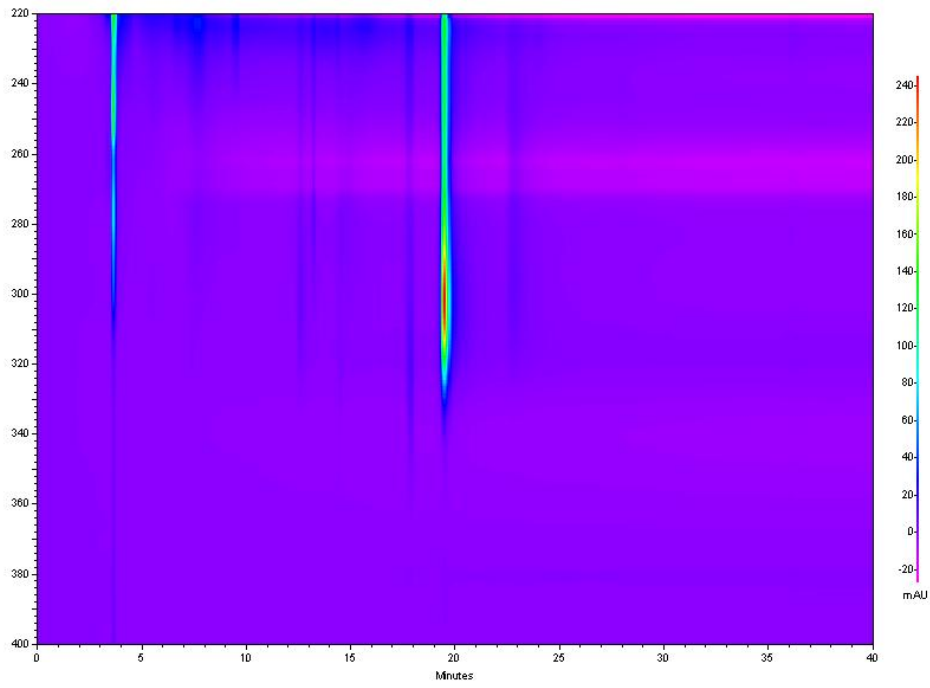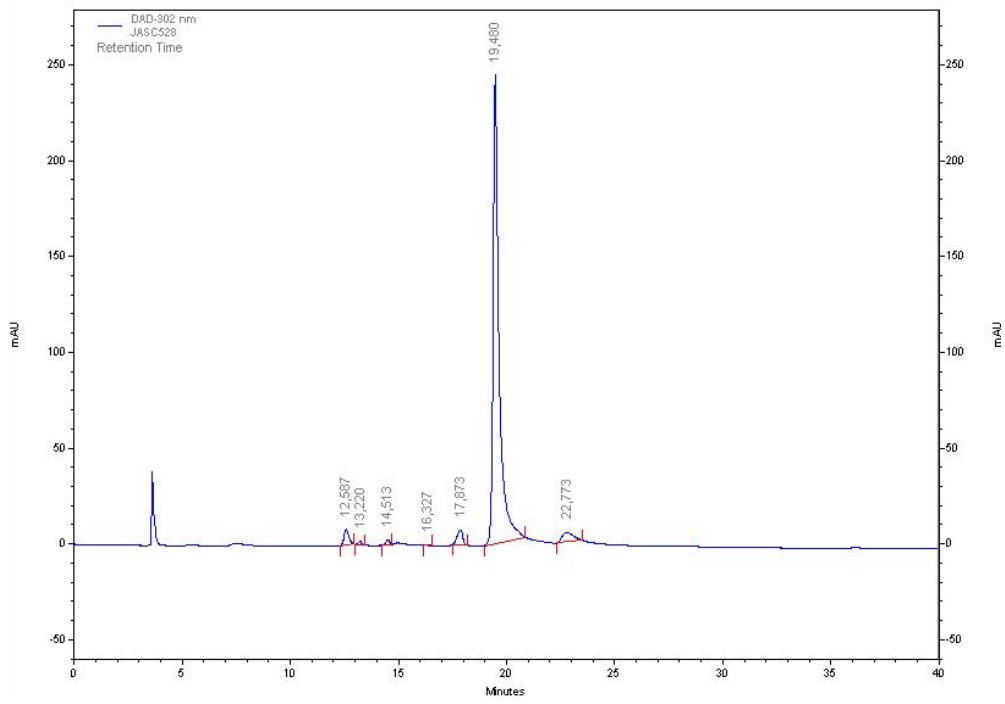



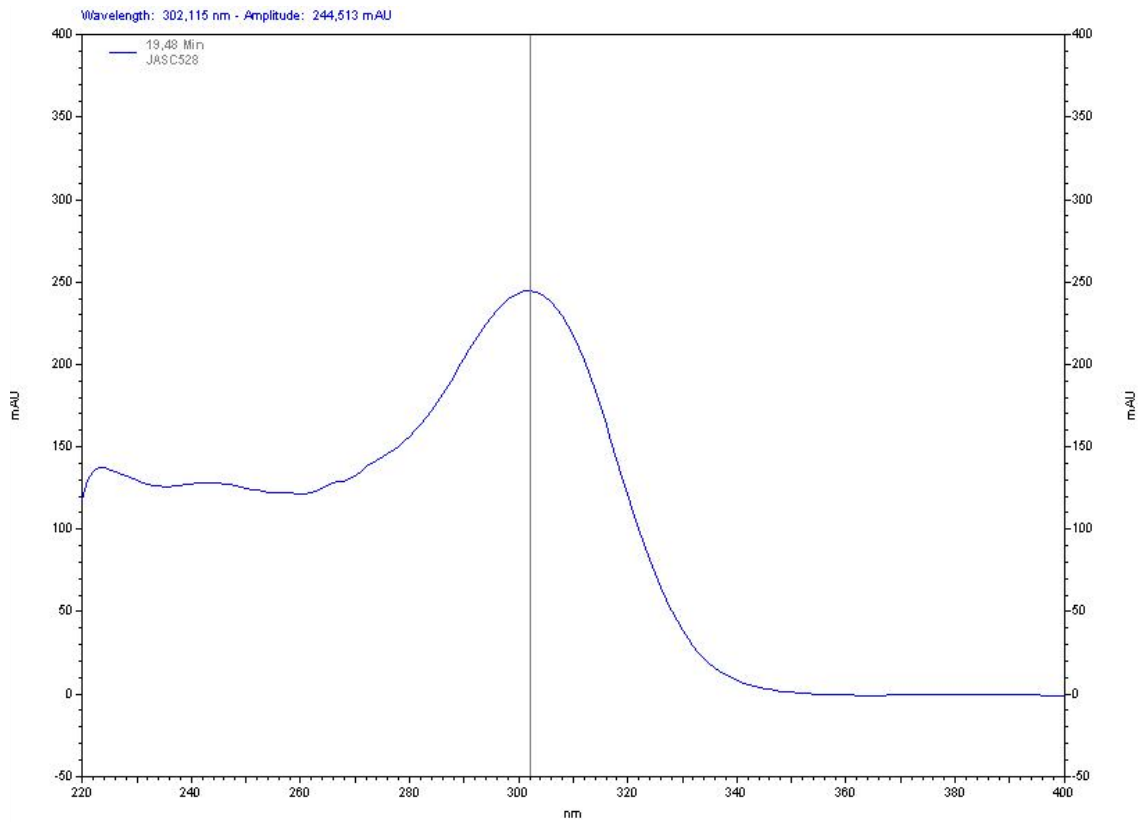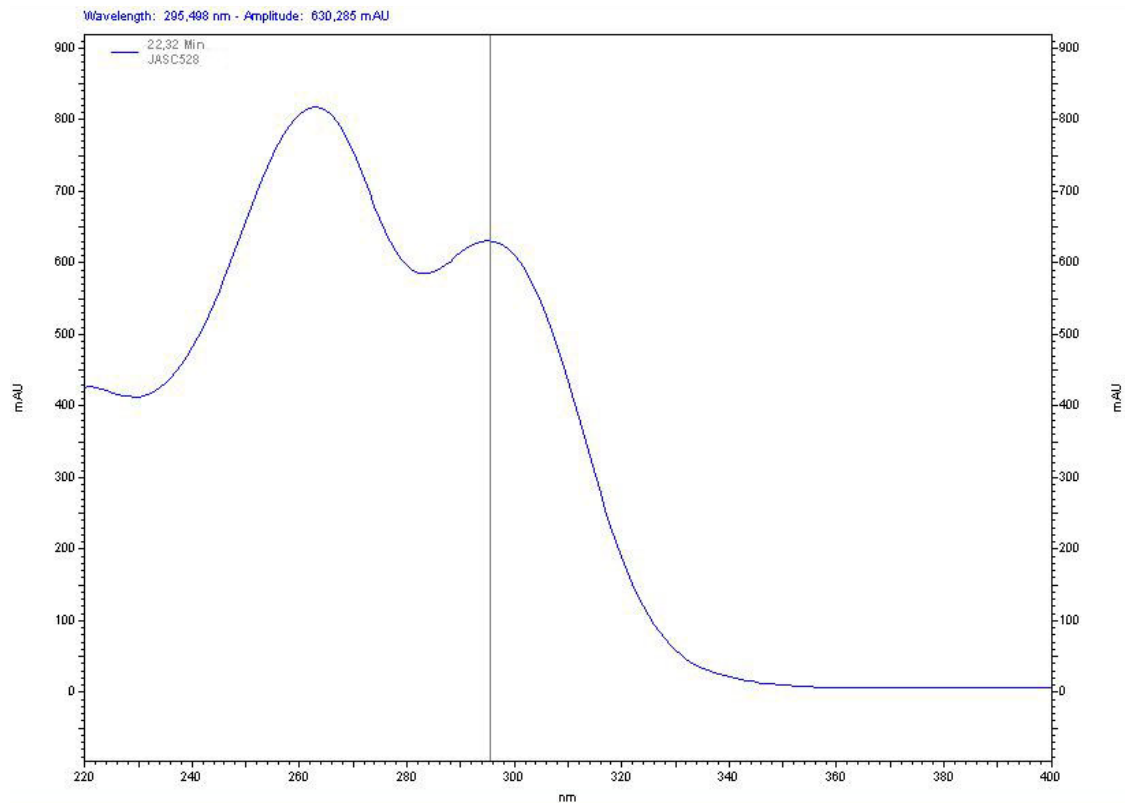

# HPLC of HMF

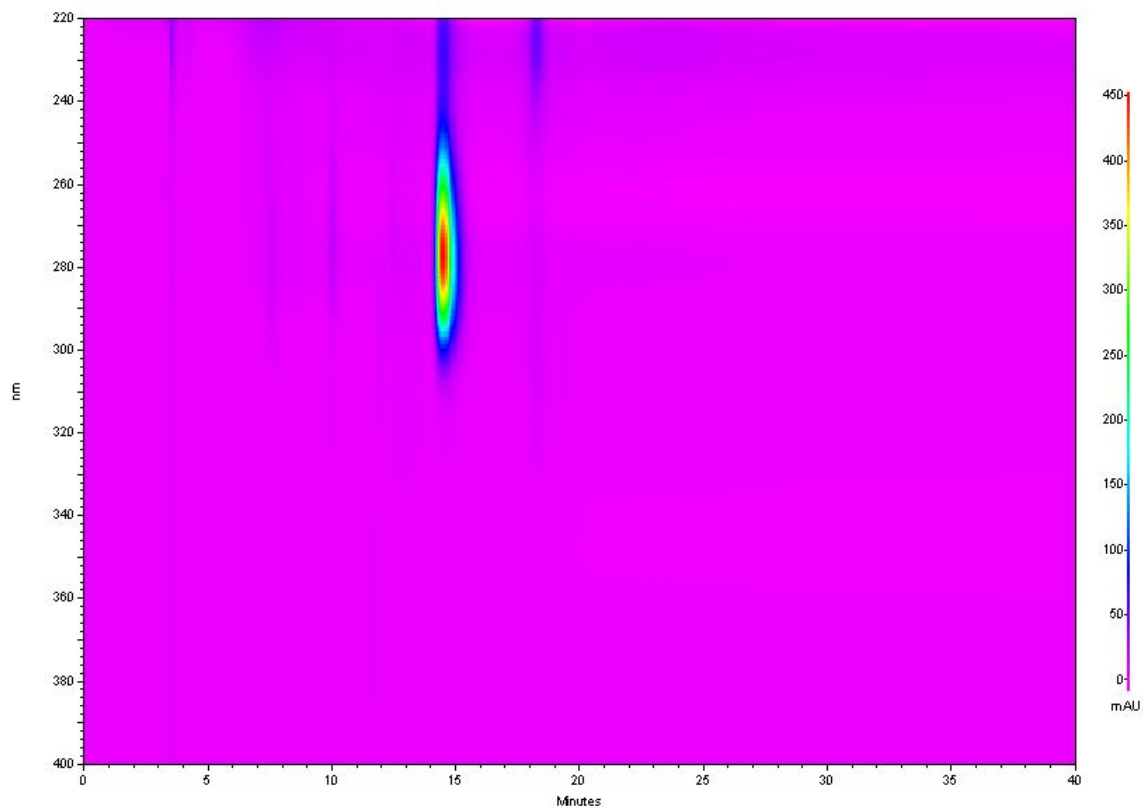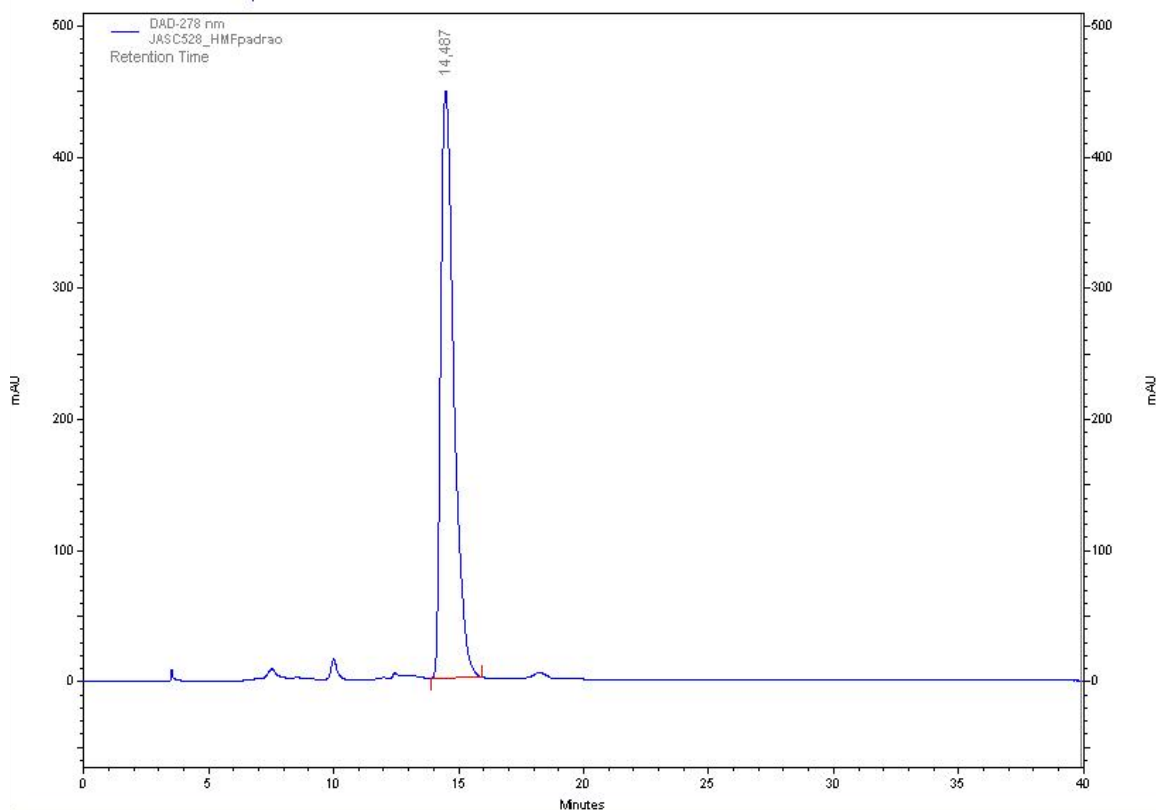

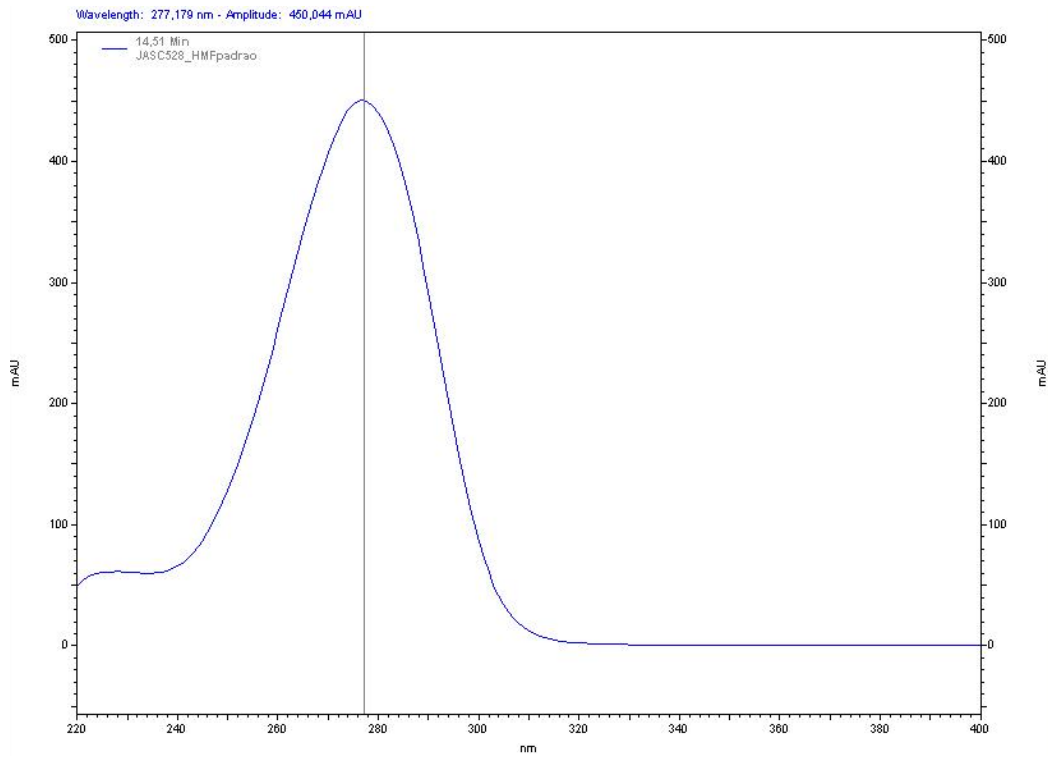

### HPLC of canizzaro product A1

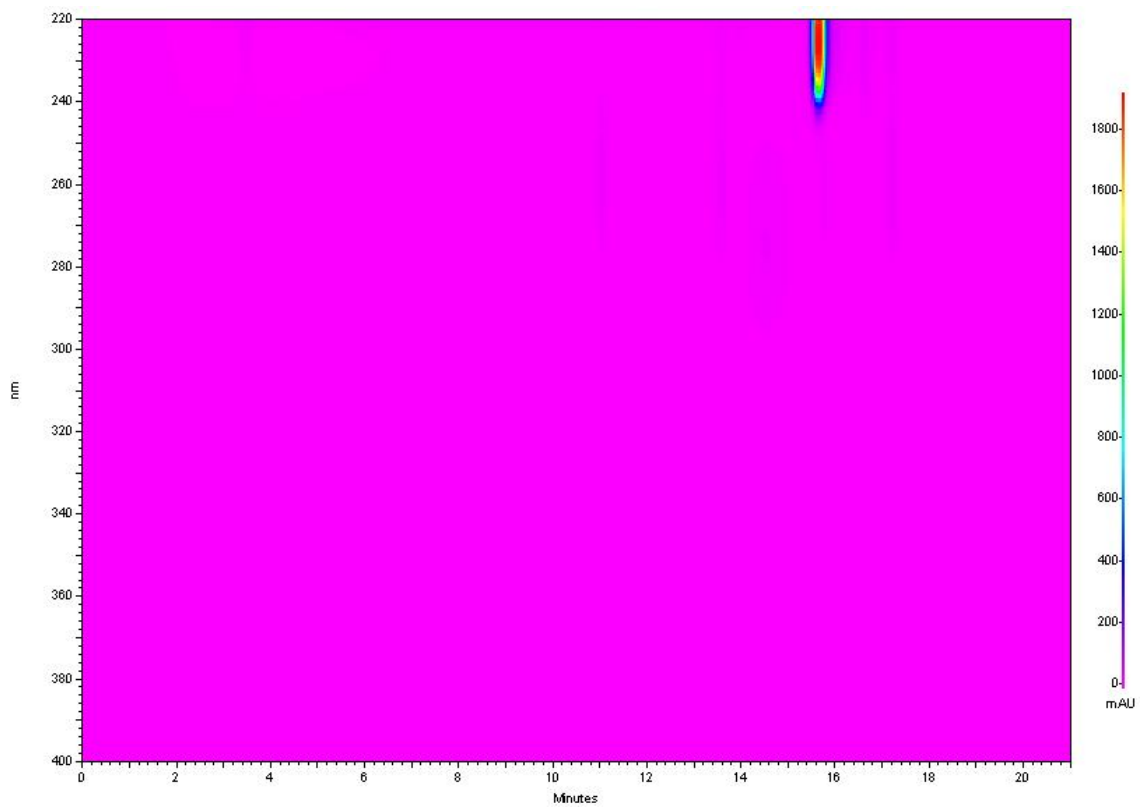

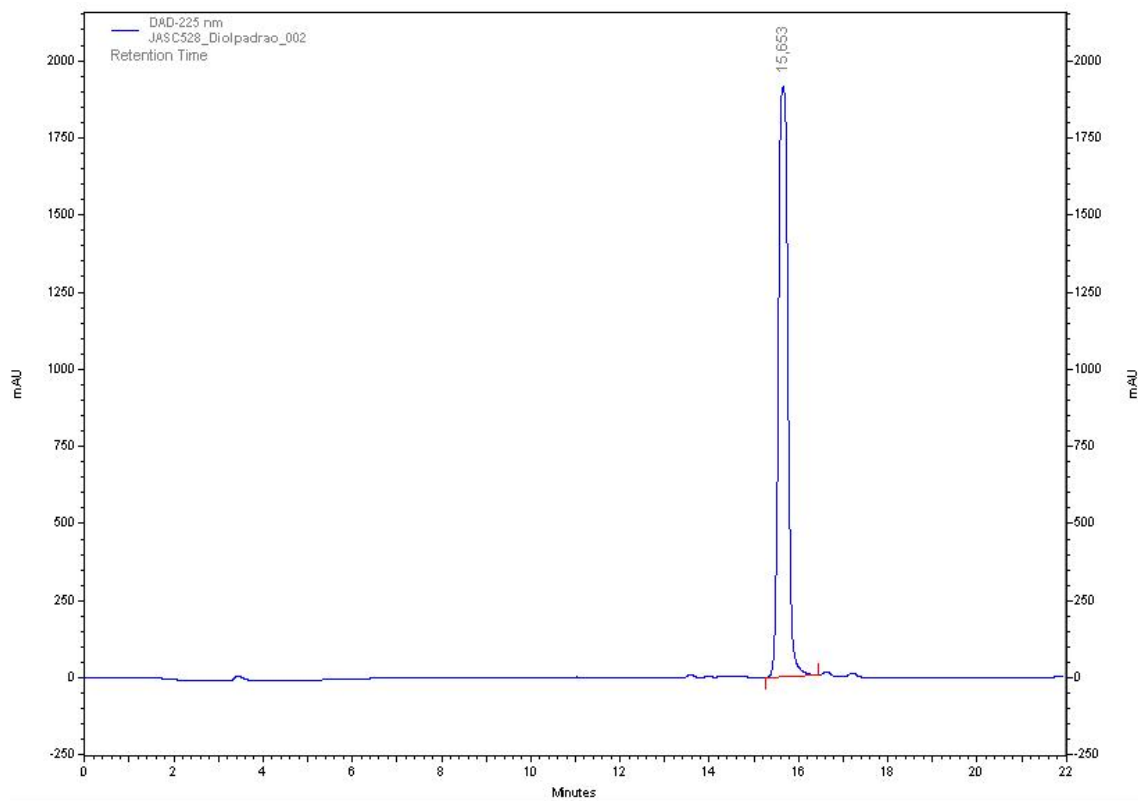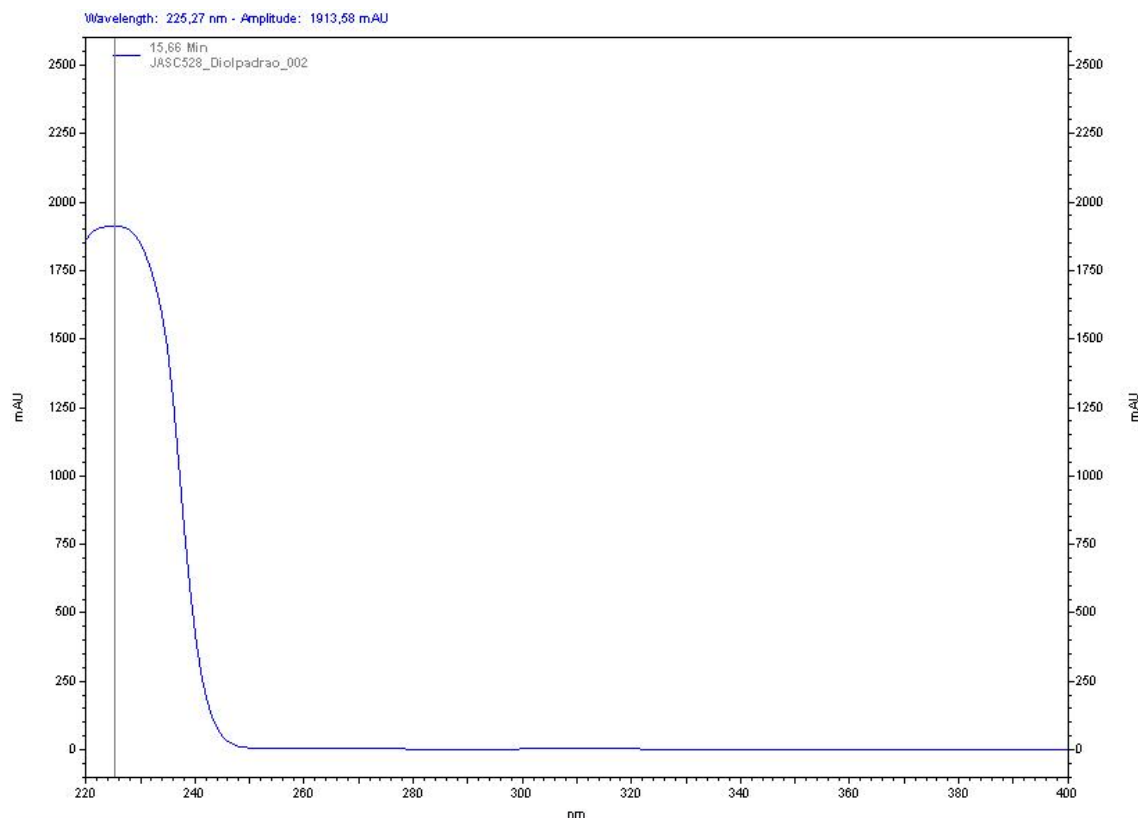

HPLC of self-condensation products **B1** ( $R_T = 23.867$  min) and **B2** ( $R_T = 19.553$  min)

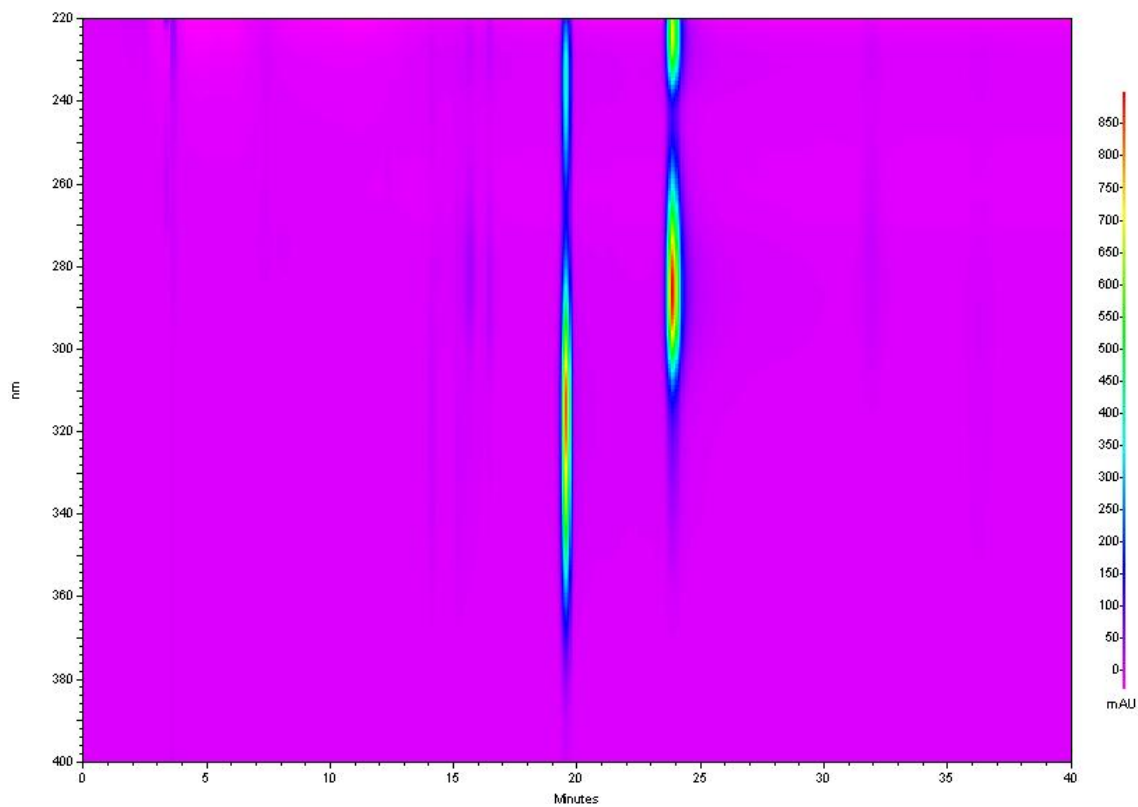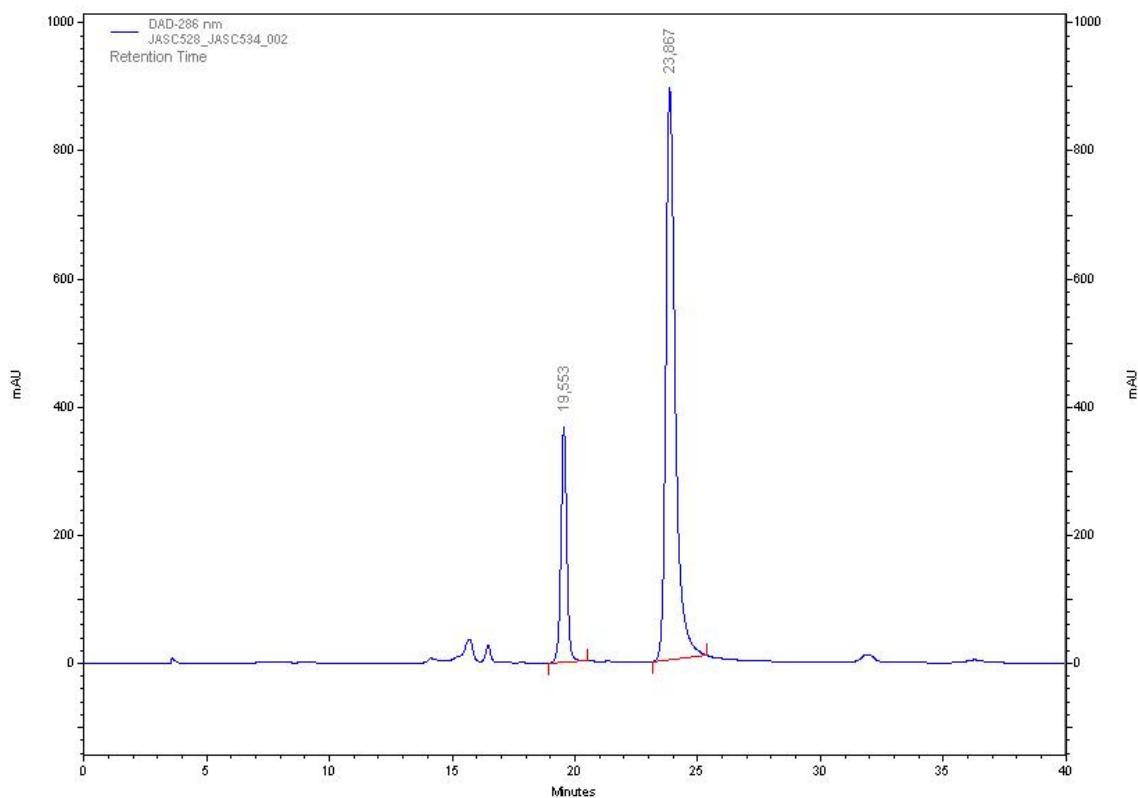

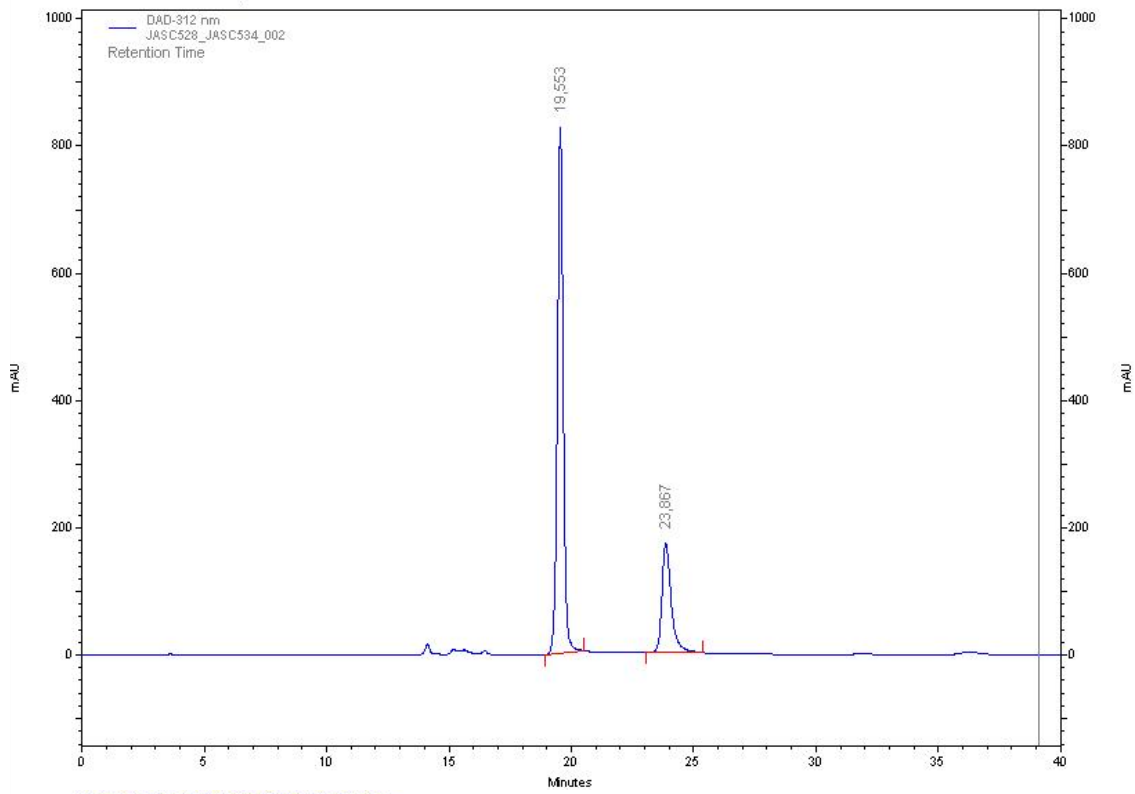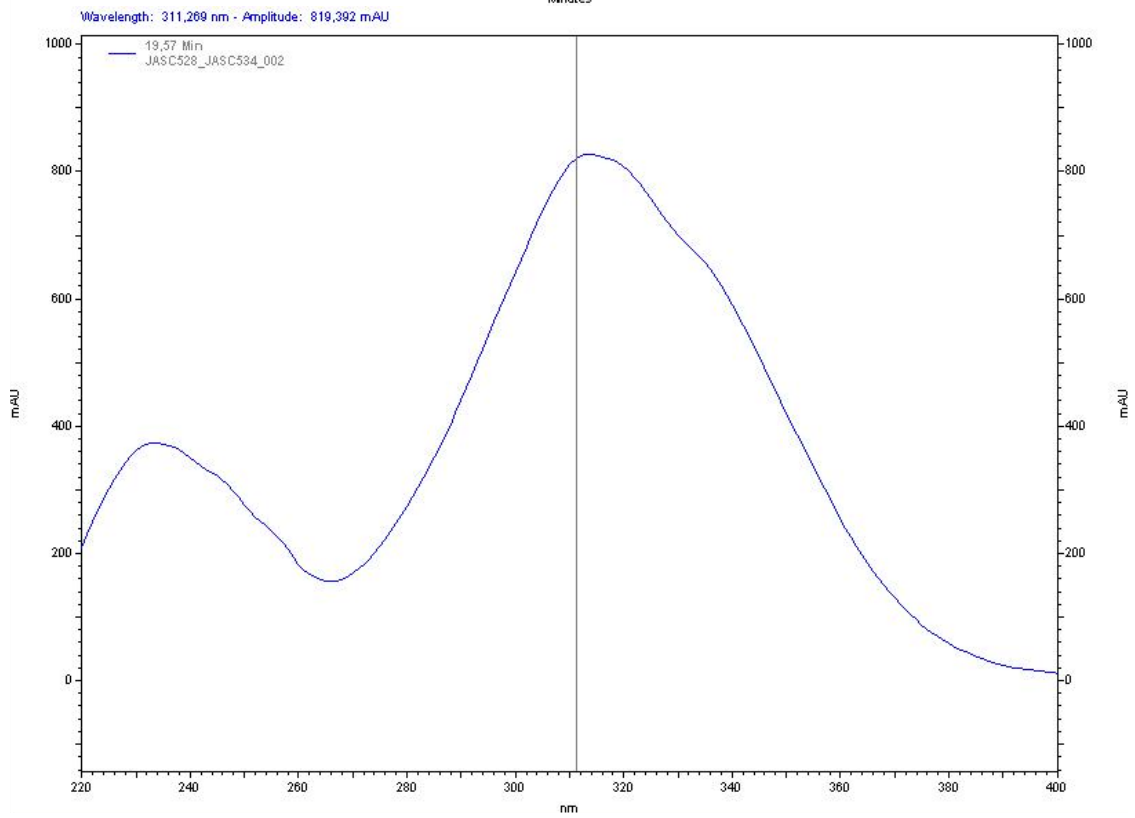

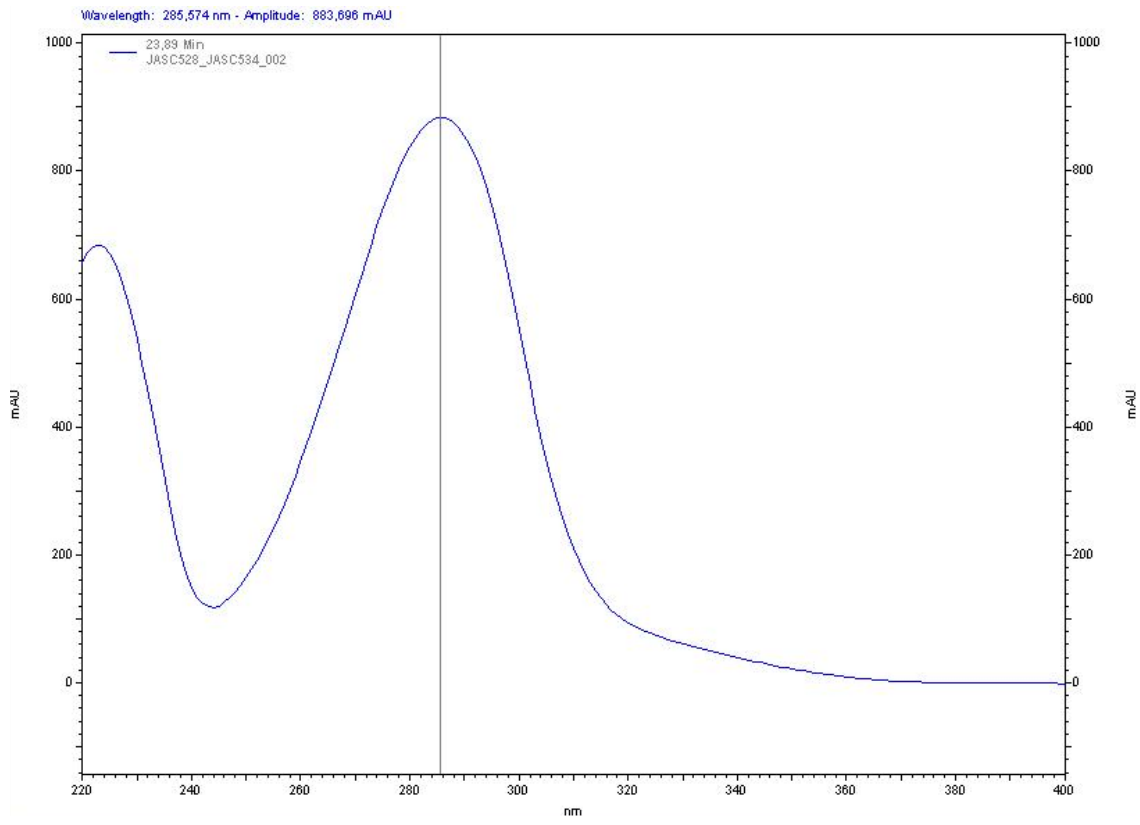

## **Biological Evaluation**

### **Cell Culture**

Human colon adenocarcinoma (CaCo-2 and HT-29), lung cancer (NCI-H460) and breast cancer (MCF-7) cell lines from ATCC were cultivated in RPMI-1640 media supplemented with L- glutamine, 10% fetal bovine serum (FBS) and antibiotic antimycotic solution (A5955, Sigma) and were grown in an incubator with a 5% CO<sub>2</sub> humidified atmosphere and at 37°C.

### **Anti-proliferative assay**

Each cell line was plated in 96-well plates with a density of approximately 5x10<sup>4</sup> (NCI-H460), 1x10<sup>5</sup> (HT-29) and 1,5x10<sup>5</sup> (MCF-7) cells/mL. Plates were incubated overnight and treated the next day with the samples to be tested. Compounds were pre-dissolved in DMSO to make a 5mM stock solution and then diluted with the cell culture media with only 0.5% FBS. The percentage of organic solvent is <1% (v/v) and at this concentrations organic solvent was seen not to affect the viability of these cell models. Concentrations used in the assay were in the range [0-15] μM. Cells were incubated for 24 hours before assessment of the viability. Media was removed and cells were washed with phosphate buffer saline (PBS) after 24 hours incubation. 0.5% FBS fresh cell culture media containing 50μg/ml neutral red was added to the plate. After 3 hours, cell monolayers were washed with PBS and the amount of neutral red retained by the cells extracted and dissolved with an organic solution (19.96 ml distilled water, 20 ml ethanol and 400 μl glacial acetic acid). Plate was gently shake and read at 540 nm in a plate reader. Viability was determined by the ratio of absorbance of treated cells and non-treated cells (control). For each experimental condition, 4 replicates were done and the average points were used to construct a fitting curve in excel. From these fitting curves, IC<sub>50</sub> was determined. Selectivity index was determined and defined as the IC<sub>50</sub> obtained for the differentiated CaCo-2 cell line, which is the studied model closest to human normal tissue, divided by the IC<sub>50</sub> determined for the cancer cell line used in the anti-proliferative assay (HT-29, MCF-7, NCI-H460).

### **Toxicity assay with CaCo-2 monolayer**

Cells were plated in 96-well plates and cultivated more 3-days after reaching total confluency. Differentiated monolayer was incubated with the tested compounds pre-dissolved in DMSO and diluted in the cell culture media with only 0.5% FBS. The percentage of organic solvent is 1% (v/v) and at this concentration viability was seen not to be affected. Cells were incubated with 10, 20 and 50 μM of each compound. Media was removed and cells were washed with phosphate buffer saline (PBS) after 24 hours incubation. Viability was determined likewise described previously, with the exception that, in this case, the neutral red solution was only incubated with the cells for 15 minutes in order to avoid absorbance values above 1. For each experimental condition, 4 replicates were done and the average points were used to construct a fitting curve in excel. From these fitting curves, IC<sub>50</sub> was determined.



## Toxicity curves of the most active compound

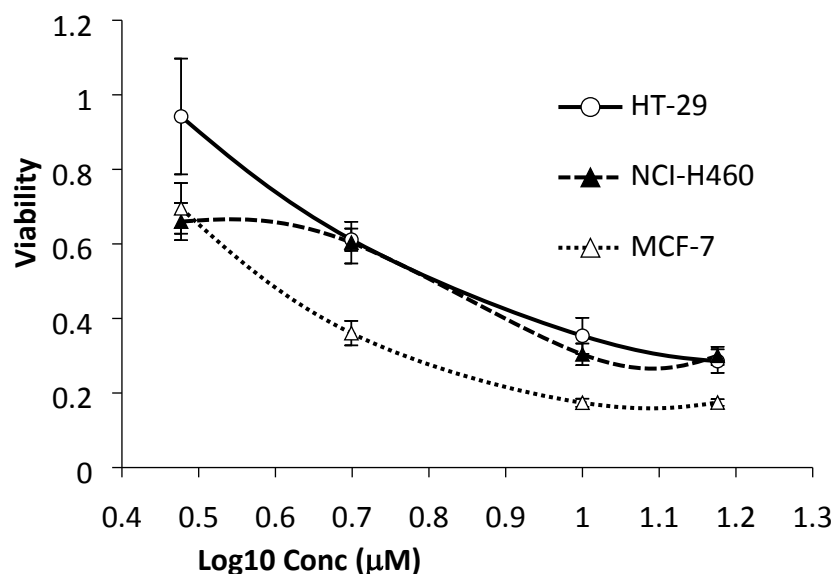

Figure 1: Cells lines were incubated with several concentrations of compound **23** for 24 hours before measurement of the viability with neutral red. Experimental points are an average of 4 replicues and error bars are  $\pm$  standard deviation.

## References

1. Arduengo III, A. J.; Krafczyk, R.; Schmutzler, R.; Craig, H. A.; Goerlich, J. R.; Marshall, W. J.; Unverzagt, M., *Tetrahedron* **1999**, 55, 14523-14534.
2. Hutt, J. T.; Aron, Z. D., *Org. Lett.* **2011**, 13, 5256-5259.
3. Kerr, M. S.; Read de Alaniz, J.; Rovis, T., *J. Org. Chem.* **2005**, 70, 5725-5728.
4. Chan, W.-W.; Yeung, S.-H.; Zhou, Z.; Chan, A. S. C.; Yu, W.-Y., *Org. Lett.* **2009**, 12, 604-607.
5. Davies, H. M. L.; Hansen, T.; Churchill, M. R., *J. Am. Chem. Soc.* **2000**, 122, 3063-3070.
6. Davies, H. M. L.; Townsend, R. J., *J. Org. Chem.* **2001**, 66, 6595-6603.
7. Hahn, N. D.; Nieger, M.; Dötz, K. H., *J. Organom. Chem.* **2004**, 689, 2662-2673.
8. Hu, M.; Ni, C.; Hu, J., *J. Am. Chem. Soc.* **2012**, 134, 15257-15260.
9. McMills, M. C.; Humes, R. J.; Pavlyuk, O. M., *Tetrahedron Lett.* **2012**, 53, 849-851.
10. Svilen, S.P.; Coelho, J. A. S. and Afonso, C. A. M., *Chemsuschem*, **2012**, 5, 1388-1391
11. Mehdi, H.; Bodor, A.; Lantos, D.; Horváth, I. T.; De Vos, D. E.; Binnemans, K. *J. Org. Chem.* **2006**, 72, 517
12. Cottier, L.; Descotes, G.; Eymard, L.; Rapp, K. *Synthesis* **1995**, 303
13. Cottier, L.; Descotes, G.; Soro, Y. J. *Carbohydr. Chem.* **2005**, 24, 55
14. Dai, H. L.; Shen, Q.; Zheng, J. B.; Li, J. Y.; Wen, R.; Li, J. *Lett. Org. Chem.* **2011**, 8, 526
15. Bogнар, R.; Herczegh, P.; Zsely, M.; Batta, G. *Carbohydr. Res.* **1987**, 164, 465
